# Supplementary material for: Cryogen-free comprehensive heartcut multidimensional gas chromatography using a Deans switch for improved analysis of petrochemical products derived from palmitic acid oxidation
Source: Royal Society of Chemistry journal article supplement (doi:10.1039/d0ay01527j), 2020-01-01
Supplement: d0ay01527j2.xlsx [file d0ay01527j2.xlsx]

## Sheet: Time recal
# injections	25	20	15	12	10	6	5	4	3	2	1	Corrected factor (Experimental-calculated # idenfied compounds (1inj))
Analysis time (h)	15.25	12.2	9.15	7.32	6.1	3.66	3.05	2.44	1.83	1.22	0.61	0
H/C window (min)	0.2	0.25	0.333333	0.416667	0.5	0.833333	1	1.25	1.66667	2.5	5
2wb,ave (min)	0.127	0.131	0.14	0.15	0.154267	0.158293	0.160305	0.165429	0.16732	0.171102	0.1733
# identified peaks	235	228	223	220	217	202	197	182	172	150	130	130	Experimental # identified peaks using 1 injection and auto integration by using Mass Hunter
Total peak capacity	7600	6786	5513	4386	3729	2442	1984	1581	1209	810	420		, see Sheet "Table S4"
0.2	min H/C window	2wb,ave (min)	0.127		0.25	min H/C window	2wb,ave (min)	0.131		0.333333	min H/C window	Baseline width (min)	0.14		0.416667	min H/C window	Baseline width (min)	0.15		0.5	min H/C window	Baseline width (min)	0.154267		0.833333	min H/C window	Baseline width (min)	0.158293		1	min H/C window	Baseline width (min)	0.160305		1.25	min H/C window	Baseline width (min)	0.165429		1.66667	min H/C window	Baseline width (min)	0.16732		2.5	min H/C window	Baseline width (min)	0.171102
		# identified peaks	235				# identified peaks	228				# identified peaks	223				# identified peaks	220				# identified peaks	217				# identified peaks	202				# identified peaks	197				# identified peaks	182				# identified peaks	172				# identified peaks	150
1tR,recal	2tR,recal	2tR,recal,grid-scale	Grid-scale coordinate		1tR,recal	2tR,recal	2tR,recal,grid-scale	Grid-scale coordinate		1tR,recal	2tR,recal	2tR,recal,grid-scale	Grid-scale coordinate		1tR,recal	2tR,recal	2tR,recal,grid-scale	Grid-scale coordinate		1tR,recal	2tR,recal	2tR,recal,grid-scale	Grid-scale coordinate		1tR,recal	2tR,recal	2tR,recal,grid-scale	Grid-scale coordinate		1tR,recal	2tR,recal	2tR,recal,grid-scale	Grid-scale coordinate		1tR,recal	2tR,recal	2tR,recal,grid-scale	Grid-scale coordinate		1tR,recal	2tR,recal	2tR,recal,grid-scale	Grid-scale coordinate		1tR,recal	2tR,recal	2tR,recal,grid-scale	Grid-scale coordinate
4.5	3.3	3.3	4.5,3.3		4.625	3.2	3.3	4.63,3.3		4.5	3.3	3.4	4.5,3.4		4.79167	3	3	4.79,3		4.75	3.1	3.2	4.75,3.2		4.58333	3.3	3.3	4.58,3.3		4.5	3.3	3.4	4.5,3.4		5.625	2.2	2.3	5.625,2.3		5.83333	2	2	5.83,2		6.25	1.6	1.7	6.25,1.7
4.5	3.5	3.6	4.5,3.6		4.625	3.4	3.4	4.63,3.4		4.5	3.5	3.5	4.5,3.5		4.79167	3.2	3.3	4.79,3.3		4.75	3.3	3.4	4.75,3.4		4.58333	3.4	3.5	4.58,3.5		4.5	3.5	3.5	4.5,3.5		5.625	2.4	2.5	5.625,2.5		5.83333	2.2	2.3	5.83,2.3		6.25	1.8	1.9	6.25,1.9
4.5	5.3	5.3	4.5,5.3		4.625	5.2	5.2	4.63,5.2		4.5	5.3	5.3	4.5,5.3		4.79167	5	5.1	4.79,5.1		4.75	5	5.1	4.75,5.1		4.58333	5.2	5.2	4.58,5.2		4.5	5.3	5.5	4.5,5.5		5.625	4.2	4.3	5.625,4.3		5.83333	4	4	5.83,4		6.25	3.5	3.6	6.25,3.6
4.7	5.1	5.2	4.7,5.2		4.875	5	5.1	4.88,5.1		4.83333	5	5	4.83,5		4.79167	5	5.1	4.79,5.1		4.75	5.1	5.2	4.75,5.2		5.41667	4.4	4.4	5.42,4.4		5.5	4.3	4.3	5.5,4.3		5.625	4.2	4.3	5.625,4.3		5.83333	4	4	5.83,4		6.25	3.6	3.8	6.25,3.8
4.7	6.6	6.6	4.7,6.6		4.875	6.4	6.4	4.88,6.4		4.83333	6.5	6.6	4.83,6.6		4.79167	6.5	6.6	4.79,6.6		4.75	6.6	6.6	4.75,6.6		5.41667	5.9	6	5.42,6		5.5	5.8	5.9	5.5,5.9		5.625	5.7	5.8	5.625,5.8		5.83333	5.5	5.5	5.83,5.5		6.25	5.1	5.1	6.25,5.1
5.1	4.2	4.3	5.1,4.3		5.125	4.2	4.3	5.13,4.3		5.16667	4.2	4.2	5.17,4.2		5.20833	4.1	4.2	5.21,4.2		5.25	4.1	4.2	5.25,4.2		5.41667	3.9	4	5.42,4		5.5	3.8	3.8	5.5,3.8		5.625	3.7	3.8	5.625,3.8		5.83333	3.5	3.5	5.83,3.5		6.25	3.1	3.3	6.25,3.3
5.1	5.8	5.8	5.1,5.8		5.125	5.7	5.8	5.13,5.8		5.16667	5.7	5.7	5.17,5.7		5.20833	5.7	5.7	5.21,5.7		5.25	5.6	5.7	5.25,5.7		5.41667	5.4	5.5	5.42,5.5		5.5	5.4	5.5	5.5,5.5		5.625	5.2	5.3	5.625,5.3		5.83333	5	5	5.83,5		6.25	4.6	4.6	6.25,4.6
5.1	5.9	6	5.1,6		5.125	5.9	6	5.13,6		5.16667	5.9	6	5.17,6		5.20833	5.8	5.9	5.21,5.9		5.25	5.8	5.9	5.25,5.9		5.41667	5.6	5.7	5.42,5.7		5.5	5.5	5.6	5.5,5.6		5.625	5.4	5.5	5.625,5.5		5.83333	5.2	5.4	5.83,5.4		6.25	4.8	5	6.25,5
5.1	6.9	7	5.1,7		5.125	6.8	6.8	5.13,6.8		5.16667	6.8	6.9	5.17,6.9		5.20833	6.7	6.8	5.21,6.8		5.25	6.7	6.8	5.25,6.8		5.41667	6.5	6.6	5.42,6.6		5.5	6.5	6.6	5.5,6.6		5.625	6.3	6.5	5.625,6.5		5.83333	6.1	6.2	5.83,6.2		6.25	5.7	5.8	6.25,5.8
5.3	4.1	4.2	5.3,4.2		5.375	4	4.1	5.38,4.1		5.5	3.9	3.9	5.5,3.9		5.625	3.8	3.9	5.63,3.9		5.75	3.7	3.7	5.75,3.7		5.41667	4	4.1	5.42,4.1		5.5	3.9	4	5.5,4		5.625	3.8	3.8	5.625,3.8		5.83333	3.6	3.7	5.83,3.7		6.25	3.2	3.3	6.25,3.3
5.3	5.8	5.8	5.3,5.8		5.375	5.7	5.8	5.38,5.8		5.5	5.6	5.6	5.5,5.6		5.625	5.5	5.6	5.63,5.6		5.75	5.3	5.4	5.75,5.4		5.41667	5.7	5.9	5.42,5.9		5.5	5.6	5.6	5.5,5.6		5.625	5.5	5.6	5.625,5.6		5.83333	5.2	5.4	5.83,5.4		6.25	4.8	5	6.25,5
5.7	6.1	6.2	5.7,6.2		5.875	5.9	6	5.88,6		5.83333	5.9	6	5.83,6		6.04167	5.7	5.7	6.04,5.7		5.75	6	6	5.75,6		6.25	5.5	5.5	6.25,5.5		6.5	5.3	5.5	6.5,5.5		6.875	4.9	5	6.875,5		5.83333	5.9	6	5.83,6		6.25	5.5	5.6	6.25,5.6
5.7	7.2	7.2	5.7,7.2		5.875	7	7.1	5.88,7.1		5.83333	7	7	5.83,7		6.04167	6.8	6.9	6.04,6.9		5.75	7.1	7.3	5.75,7.3		6.25	6.6	6.6	6.25,6.6		6.5	6.4	6.4	6.5,6.4		6.875	6	6.1	6.875,6.1		5.83333	7	7	5.83,7		6.25	6.6	6.7	6.25,6.7
5.9	4.3	4.3	5.9,4.3		6.125	4	4.1	6.13,4.1		6.16667	4	4.1	6.17,4.1		6.04167	4.1	4.2	6.04,4.2		6.25	3.9	4	6.25,4		6.25	3.9	4	6.25,4		6.5	3.7	3.8	6.5,3.8		6.875	3.3	3.3	6.875,3.3		7.5	2.7	2.8	7.5,2.8		6.25	3.9	3.9	6.25,3.9
5.9	5.5	5.6	5.9,5.6		6.125	5.3	5.4	6.13,5.4		6.16667	5.2	5.3	6.17,5.3		6.04167	5.3	5.4	6.04,5.4		6.25	5.1	5.2	6.25,5.2		6.25	5.1	5.2	6.25,5.2		6.5	4.9	5	6.5,5		6.875	4.5	4.6	6.875,4.6		7.5	3.9	4	7.5,4		6.25	5.1	5.1	6.25,5.1
5.9	5.9	6	5.9,6		6.125	5.7	5.8	6.13,5.8		6.16667	5.6	5.6	6.17,5.6		6.04167	5.8	5.9	6.04,5.9		6.25	5.6	5.7	6.25,5.7		6.25	5.6	5.7	6.25,5.7		6.5	5.3	5.5	6.5,5.5		6.875	4.9	5	6.875,5		7.5	4.3	4.4	7.5,4.4		6.25	5.6	5.6	6.25,5.6
6.1	4.4	4.4	6.1,4.4		6.125	4.3	4.3	6.13,4.3		6.16667	4.3	4.3	6.17,4.3		6.45833	4	4.1	6.46,4.1		6.25	4.2	4.3	6.25,4.3		6.25	4.2	4.3	6.25,4.3		6.5	4	4	6.5,4		6.875	3.6	3.6	6.875,3.6		7.5	3	3	7.5,3		6.25	4.2	4.3	6.25,4.3
6.1	5.9	6	6.1,6		6.125	5.9	6	6.13,6		6.16667	5.8	5.9	6.17,5.9		6.45833	5.6	5.7	6.46,5.7		6.25	5.8	5.9	6.25,5.9		6.25	5.8	5.9	6.25,5.9		6.5	5.5	5.6	6.5,5.6		6.875	5.1	5.1	6.875,5.1		7.5	4.5	4.5	7.5,4.5		6.25	5.8	5.8	6.25,5.8
6.1	6.9	7	6.1,7		6.125	6.9	6.9	6.13,6.9		6.16667	6.8	6.9	6.17,6.9		6.45833	6.5	6.6	6.46,6.6		6.25	6.7	6.8	6.25,6.8		6.25	6.7	6.8	6.25,6.8		6.5	6.5	6.6	6.5,6.6		6.875	6.1	6.1	6.875,6.1		7.5	5.5	5.5	7.5,5.5		6.25	6.7	6.8	6.25,6.8
6.3	7.6	7.6	6.3,7.6		6.375	7.5	7.6	6.38,7.6		6.5	7.4	7.4	6.5,7.4		6.45833	7.4	7.5	6.46,7.5		6.75	7.1	7.3	6.75,7.3		7.08333	6.8	6.8	7.08,6.8		6.5	7.4	7.5	6.5,7.5		6.875	7	7.1	6.875,7.1		7.5	6.4	6.5	7.5,6.5		8.75	5.1	5.1	8.75,5.1
6.5	4.5	4.6	6.5,4.6		6.625	4.4	4.5	6.63,4.5		6.5	4.5	4.6	6.5,4.6		6.875	4.2	4.2	6.88,4.2		6.75	4.3	4.3	6.75,4.3		7.08333	4	4.1	7.08,4.1		6.5	4.5	4.6	6.5,4.6		6.875	4.2	4.3	6.875,4.3		7.5	3.5	3.5	7.5,3.5		8.75	2.3	2.4	8.75,2.4
6.5	5.6	5.7	6.5,5.7		6.625	5.5	5.5	6.63,5.5		6.5	5.6	5.6	6.5,5.6		6.875	5.3	5.4	6.88,5.4		6.75	5.4	5.6	6.75,5.6		7.08333	5.1	5.2	7.08,5.2		6.5	5.6	5.6	6.5,5.6		6.875	5.3	5.5	6.875,5.5		7.5	4.6	4.7	7.5,4.7		8.75	3.4	3.4	8.75,3.4
6.5	6.8	6.9	6.5,6.9		6.625	6.7	6.8	6.63,6.8		6.5	6.8	6.9	6.5,6.9		6.875	6.4	6.5	6.88,6.5		6.75	6.5	6.6	6.75,6.6		7.08333	6.2	6.3	7.08,6.3		6.5	6.8	6.9	6.5,6.9		6.875	6.4	6.5	6.875,6.5		7.5	5.8	5.9	7.5,5.9		8.75	4.5	4.6	8.75,4.6
6.7	4.5	4.6	6.7,4.6		6.875	4.4	4.5	6.88,4.5		6.83333	4.4	4.5	6.83,4.5		6.875	4.4	4.5	6.88,4.5		6.75	4.5	4.6	6.75,4.6		7.08333	4.2	4.3	7.08,4.3		7.5	3.7	3.8	7.5,3.8		6.875	4.4	4.5	6.875,4.5		7.5	3.7	3.8	7.5,3.8		8.75	2.5	2.6	8.75,2.6
6.7	5	5.1	6.7,5.1		6.875	4.8	4.8	6.88,4.8		6.83333	4.8	4.9	6.83,4.9		6.875	4.8	4.8	6.88,4.8		6.75	4.9	4.9	6.75,4.9		7.08333	4.6	4.7	7.08,4.7		7.5	4.2	4.3	7.5,4.3		6.875	4.8	5	6.875,5		7.5	4.2	4.4	7.5,4.4		8.75	2.9	2.9	8.75,2.9
6.7	5.1	5.2	6.7,5.2		6.875	4.9	5	6.88,5		6.83333	5	5	6.83,5		6.875	4.9	5	6.88,5		6.75	5	5.1	6.75,5.1		7.08333	4.7	4.7	7.08,4.7		7.5	4.3	4.3	7.5,4.3		6.875	4.9	5	6.875,5		7.5	4.3	4.4	7.5,4.4		8.75	3	3.1	8.75,3.1
6.9	5.7	5.7	6.9,5.7		7.125	5.4	5.5	7.13,5.5		7.16667	5.4	5.5	7.17,5.5		7.29167	5.3	5.4	7.29,5.4		7.25	5.3	5.4	7.25,5.4		7.08333	5.5	5.5	7.08,5.5		7.5	5.1	5.1	7.5,5.1		8.125	4.4	4.5	8.125,4.5		7.5	5.1	5.2	7.5,5.2		8.75	3.8	3.9	8.75,3.9
6.9	6.2	6.2	6.9,6.2		7.125	6	6	7.13,6		7.16667	5.9	6	7.17,6		7.29167	5.8	5.9	7.29,5.9		7.25	5.9	6	7.25,6		7.08333	6	6	7.08,6		7.5	5.6	5.6	7.5,5.6		8.125	5	5.1	8.125,5.1		7.5	5.6	5.7	7.5,5.7		8.75	4.4	4.4	8.75,4.4
6.9	6.6	6.6	6.9,6.6		7.125	6.4	6.4	7.13,6.4		7.16667	6.3	6.3	7.17,6.3		7.29167	6.2	6.3	7.29,6.3		7.25	6.2	6.3	7.25,6.3		7.08333	6.4	6.5	7.08,6.5		7.5	6	6.1	7.5,6.1		8.125	5.4	5.5	8.125,5.5		7.5	6	6	7.5,6		8.75	4.7	4.8	8.75,4.8
7.1	3.7	3.8	7.1,3.8		7.125	3.7	3.8	7.13,3.8		7.16667	3.6	3.6	7.17,3.6		7.29167	3.5	3.6	7.29,3.6		7.25	3.6	3.7	7.25,3.7		7.91667	2.9	3	7.92,3		7.5	3.3	3.4	7.5,3.4		8.125	2.7	2.8	8.125,2.8		7.5	3.3	3.3	7.5,3.3		8.75	2.1	2.2	8.75,2.2
7.1	4.7	4.8	7.1,4.8		7.125	4.7	4.7	7.13,4.7		7.16667	4.7	4.8	7.17,4.8		7.29167	4.5	4.5	7.29,4.5		7.25	4.6	4.6	7.25,4.6		7.91667	3.9	4	7.92,4		7.5	4.3	4.3	7.5,4.3		8.125	3.7	3.8	8.125,3.8		7.5	4.3	4.4	7.5,4.4		8.75	3.1	3.3	8.75,3.3
7.1	5.5	5.6	7.1,5.6		7.125	5.5	5.5	7.13,5.5		7.16667	5.4	5.5	7.17,5.5		7.29167	5.3	5.4	7.29,5.4		7.25	5.3	5.4	7.25,5.4		7.91667	4.7	4.7	7.92,4.7		7.5	5.1	5.1	7.5,5.1		8.125	4.5	4.6	8.125,4.6		7.5	5.1	5.2	7.5,5.2		8.75	3.8	3.9	8.75,3.9
7.1	6.5	6.6	7.1,6.6		7.125	6.5	6.6	7.13,6.6		7.16667	6.4	6.4	7.17,6.4		7.29167	6.3	6.3	7.29,6.3		7.25	6.3	6.3	7.25,6.3		7.91667	5.7	5.9	7.92,5.9		7.5	6.1	6.3	7.5,6.3		8.125	5.5	5.6	8.125,5.6		7.5	6.1	6.2	7.5,6.2		8.75	4.8	5	8.75,5
7.5	2.7	2.8	7.5,2.8		7.625	2.5	2.6	7.63,2.6		7.5	2.7	2.8	7.5,2.8		7.70833	2.5	2.6	7.71,2.6		7.75	2.4	2.5	7.75,2.5		7.91667	2.2	2.2	7.92,2.2		7.5	2.7	2.7	7.5,2.7		8.125	2	2.2	8.125,2.2		7.5	2.7	2.8	7.5,2.8		8.75	1.4	1.5	8.75,1.5
7.5	5.7	5.7	7.5,5.7		7.625	5.5	5.5	7.63,5.5		7.5	5.7	5.7	7.5,5.7		7.70833	5.4	5.4	7.71,5.4		7.75	5.4	5.6	7.75,5.6		7.91667	5.2	5.2	7.92,5.2		7.5	5.7	5.8	7.5,5.8		8.125	5	5.1	8.125,5.1		7.5	5.7	5.9	7.5,5.9		8.75	4.4	4.4	8.75,4.4
7.7	6.2	6.2	7.7,6.2		7.875	6	6	7.88,6		7.83333	6	6	7.83,6		7.70833	6.2	6.3	7.71,6.3		7.75	6.1	6.2	7.75,6.2		7.91667	6	6	7.92,6		8.5	5.4	5.5	8.5,5.5		8.125	5.8	6	8.125,6		9.16667	4.7	4.9	9.17,4.9		8.75	5.1	5.1	8.75,5.1
7.9	4.7	4.8	7.9,4.8		8.125	4.4	4.5	8.13,4.5		8.16667	4.4	4.5	8.17,4.5		8.125	4.4	4.5	8.13,4.5		8.25	4.3	4.3	8.25,4.3		7.91667	4.7	4.7	7.92,4.7		8.5	4.1	4.2	8.5,4.2		8.125	4.4	4.5	8.125,4.5		9.16667	3.4	3.5	9.17,3.5		8.75	3.8	3.9	8.75,3.9
7.9	6.3	6.4	7.9,6.4		8.125	6	6	8.13,6		8.16667	6	6	8.17,6		8.125	6	6	8.13,6		8.25	5.9	6	8.25,6		7.91667	6.2	6.3	7.92,6.3		8.5	5.7	5.8	8.5,5.8		8.125	6	6.1	8.125,6.1		9.16667	5	5	9.17,5		8.75	5.4	5.5	8.75,5.5
7.9	6.4	6.5	7.9,6.5		8.125	6.1	6.2	8.13,6.2		8.16667	6.1	6.2	8.17,6.2		8.125	6.1	6.2	8.13,6.2		8.25	6	6	8.25,6		7.91667	6.4	6.5	7.92,6.5		8.5	5.8	5.9	8.5,5.9		8.125	6.1	6.1	8.125,6.1		9.16667	5.1	5.2	9.17,5.2		8.75	5.5	5.6	8.75,5.6
7.9	9.2	9.3	7.9,9.3		8.125	8.9	8.9	8.13,8.9		8.16667	8.9	9	8.17,9		8.125	8.9	9	8.13,9		8.25	8.8	8.9	8.25,8.9		7.91667	9.1	9.2	7.92,9.2		8.5	8.6	8.7	8.5,8.7		8.125	8.9	8.9	8.125,8.9		9.16667	7.9	8	9.17,8		8.75	8.3	8.4	8.75,8.4
8.1	4.7	4.8	8.1,4.8		8.125	4.7	4.7	8.13,4.7		8.16667	4.7	4.8	8.17,4.8		8.125	4.7	4.8	8.13,4.8		8.25	4.6	4.6	8.25,4.6		8.75	4.1	4.1	8.75,4.1		8.5	4.3	4.3	8.5,4.3		8.125	4.7	4.8	8.125,4.8		9.16667	3.7	3.8	9.17,3.8		8.75	4.1	4.1	8.75,4.1
8.1	4.9	5	8.1,5		8.125	4.9	5	8.13,5		8.16667	4.8	4.9	8.17,4.9		8.125	4.9	5	8.13,5		8.25	4.8	4.9	8.25,4.9		8.75	4.3	4.4	8.75,4.4		8.5	4.5	4.6	8.5,4.6		8.125	4.9	5	8.125,5		9.16667	3.8	3.8	9.17,3.8		8.75	4.3	4.4	8.75,4.4
8.1	6.5	6.6	8.1,6.6		8.125	6.5	6.6	8.13,6.6		8.16667	6.4	6.4	8.17,6.4		8.125	6.5	6.6	8.13,6.6		8.25	6.3	6.3	8.25,6.3		8.75	5.8	5.9	8.75,5.9		8.5	6.1	6.3	8.5,6.3		8.125	6.5	6.6	8.125,6.6		9.16667	5.4	5.5	9.17,5.5		8.75	5.8	5.8	8.75,5.8
8.3	5.1	5.2	8.3,5.2		8.375	5	5.1	8.38,5.1		8.5	4.9	4.9	8.5,4.9		8.54167	4.8	4.8	8.54,4.8		8.75	4.6	4.6	8.75,4.6		8.75	4.6	4.7	8.75,4.7		8.5	4.9	5	8.5,5		9.375	4	4.1	9.375,4.1		9.16667	4.2	4.4	9.17,4.4		8.75	4.6	4.6	8.75,4.6
8.3	6.2	6.2	8.3,6.2		8.375	6.2	6.3	8.38,6.3		8.5	6	6	8.5,6		8.54167	6	6	8.54,6		8.75	5.8	5.9	8.75,5.9		8.75	5.8	5.9	8.75,5.9		8.5	6	6.1	8.5,6.1		9.375	5.2	5.3	9.375,5.3		9.16667	5.4	5.5	9.17,5.5		8.75	5.8	5.8	8.75,5.8
8.5	4.3	4.3	8.5,4.3		8.625	4.2	4.3	8.63,4.3		8.5	4.3	4.3	8.5,4.3		8.54167	4.3	4.4	8.54,4.4		8.75	4.1	4.2	8.75,4.2		8.75	4.1	4.1	8.75,4.1		8.5	4.3	4.3	8.5,4.3		9.375	3.4	3.5	9.375,3.5		9.16667	3.6	3.7	9.17,3.7		8.75	4.1	4.1	8.75,4.1
8.5	5	5.1	8.5,5.1		8.625	4.9	5	8.63,5		8.5	5	5	8.5,5		8.54167	4.9	5	8.54,5		8.75	4.7	4.8	8.75,4.8		8.75	4.7	4.7	8.75,4.7		8.5	5	5.1	8.5,5.1		9.375	4.1	4.1	9.375,4.1		9.16667	4.3	4.4	9.17,4.4		8.75	4.7	4.8	8.75,4.8
8.5	8.1	8.1	8.5,8.1		8.625	7.9	8	8.63,8		8.5	8.1	8.1	8.5,8.1		8.54167	8	8.1	8.54,8.1		8.75	7.8	7.9	8.75,7.9		8.75	7.8	7.9	8.75,7.9		8.5	8.1	8.2	8.5,8.2		9.375	7.2	7.3	9.375,7.3		9.16667	7.4	7.5	9.17,7.5		8.75	7.8	7.9	8.75,7.9
8.7	4.1	4.2	8.7,4.2		8.875	4	4.1	8.88,4.1		8.83333	4	4.1	8.83,4.1		8.95833	3.9	3.9	8.96,3.9		8.75	4.1	4.2	8.75,4.2		8.75	4.1	4.1	8.75,4.1		9.5	3.3	3.4	9.5,3.4		9.375	3.5	3.6	9.375,3.6		9.16667	3.7	3.8	9.17,3.8		8.75	4.1	4.1	8.75,4.1
8.7	4.8	4.8	8.7,4.8		8.875	4.6	4.7	8.88,4.7		8.83333	4.6	4.6	8.83,4.6		8.95833	4.5	4.5	8.96,4.5		8.75	4.7	4.8	8.75,4.8		8.75	4.7	4.7	8.75,4.7		9.5	4	4	9.5,4		9.375	4.1	4.1	9.375,4.1		9.16667	4.3	4.4	9.17,4.4		8.75	4.7	4.8	8.75,4.8
8.7	6.1	6.2	8.7,6.2		8.875	5.9	6	8.88,6		8.83333	6	6	8.83,6		8.95833	5.9	6	8.96,6		8.75	6.1	6.2	8.75,6.2		8.75	6.1	6.2	8.75,6.2		9.5	5.3	5.5	9.5,5.5		9.375	5.4	5.5	9.375,5.5		9.16667	5.6	5.7	9.17,5.7		8.75	6.1	6.2	8.75,6.2
8.9	7.2	7.2	8.9,7.2		9.125	6.9	6.9	9.13,6.9		9.16667	6.9	7	9.17,7		8.95833	7.1	7.2	8.96,7.2		9.25	6.8	6.9	9.25,6.9		9.58333	6.5	6.6	9.58,6.6		9.5	6.6	6.7	9.5,6.7		9.375	6.7	6.8	9.375,6.8		9.16667	6.9	7	9.17,7		11.25	4.8	5	11.25,5
8.9	8.3	8.4	8.9,8.4		9.125	8.1	8.1	9.13,8.1		9.16667	8	8.1	9.17,8.1		8.95833	8.2	8.3	8.96,8.3		9.25	7.9	8	9.25,8		9.58333	7.6	7.8	9.58,7.8		9.5	7.7	7.9	9.5,7.9		9.375	7.8	7.9	9.375,7.9		9.16667	8	8	9.17,8		11.25	5.9	6	11.25,6
9.1	4.9	5	9.1,5		9.125	4.9	5	9.13,5		9.16667	4.9	4.9	9.17,4.9		9.375	4.6	4.7	9.38,4.7		9.25	4.8	4.9	9.25,4.9		9.58333	4.4	4.4	9.58,4.4		9.5	4.5	4.6	9.5,4.6		9.375	4.6	4.6	9.375,4.6		9.16667	4.9	5	9.17,5		11.25	2.8	2.9	11.25,2.9
9.1	5.3	5.3	9.1,5.3		9.125	5.3	5.4	9.13,5.4		9.16667	5.3	5.3	9.17,5.3		9.375	5.1	5.1	9.38,5.1		9.25	5.2	5.2	9.25,5.2		9.58333	4.9	4.9	9.58,4.9		9.5	4.9	5	9.5,5		9.375	5.1	5.1	9.375,5.1		9.16667	5.3	5.4	9.17,5.4		11.25	3.2	3.3	11.25,3.3
9.1	8.8	8.9	9.1,8.9		9.125	8.8	8.9	9.13,8.9		9.16667	8.7	8.8	9.17,8.8		9.375	8.5	8.6	9.38,8.6		9.25	8.7	8.8	9.25,8.8		9.58333	8.3	8.4	9.58,8.4		9.5	8.4	8.5	9.5,8.5		9.375	8.5	8.6	9.375,8.6		9.16667	8.7	8.7	9.17,8.7		11.25	6.7	6.8	11.25,6.8
9.3	5.2	5.2	9.3,5.2		9.375	5.1	5.1	9.38,5.1		9.5	5	5	9.5,5		9.375	5.1	5.1	9.38,5.1		9.75	4.7	4.8	9.75,4.8		9.58333	4.9	4.9	9.58,4.9		9.5	5	5.1	9.5,5.1		9.375	5.1	5.1	9.375,5.1		10.8333	3.6	3.7	10.83,3.7		11.25	3.2	3.3	11.25,3.3
9.3	6	6.1	9.3,6.1		9.375	6	6	9.38,6		9.5	5.8	5.9	9.5,5.9		9.375	6	6	9.38,6		9.75	5.6	5.7	9.75,5.7		9.58333	5.7	5.9	9.58,5.9		9.5	5.8	5.9	9.5,5.9		9.375	6	6.1	9.375,6.1		10.8333	4.5	4.5	10.83,4.5		11.25	4.1	4.1	11.25,4.1
9.3	6.3	6.4	9.3,6.4		9.375	6.2	6.3	9.38,6.3		9.5	6.1	6.2	9.5,6.2		9.375	6.2	6.3	9.38,6.3		9.75	5.8	5.9	9.75,5.9		9.58333	6	6	9.58,6		9.5	6.1	6.3	9.5,6.3		9.375	6.2	6.3	9.375,6.3		10.8333	4.7	4.9	10.83,4.9		11.25	4.3	4.4	11.25,4.4
9.3	6.5	6.6	9.3,6.6		9.375	6.4	6.4	9.38,6.4		9.5	6.3	6.3	9.5,6.3		9.375	6.4	6.5	9.38,6.5		9.75	6	6	9.75,6		9.58333	6.2	6.3	9.58,6.3		9.5	6.3	6.4	9.5,6.4		9.375	6.4	6.5	9.375,6.5		10.8333	4.9	5	10.83,5		11.25	4.5	4.6	11.25,4.6
9.3	6.9	7	9.3,7		9.375	6.8	6.8	9.38,6.8		9.5	6.7	6.7	9.5,6.7		9.375	6.8	6.9	9.38,6.9		9.75	6.5	6.6	9.75,6.6		9.58333	6.6	6.6	9.58,6.6		9.5	6.7	6.7	9.5,6.7		9.375	6.8	6.9	9.375,6.9		10.8333	5.4	5.5	10.83,5.5		11.25	5	5.1	11.25,5.1
9.3	7.3	7.4	9.3,7.4		9.375	7.2	7.2	9.38,7.2		9.5	7.1	7.1	9.5,7.1		9.375	7.2	7.2	9.38,7.2		9.75	6.8	6.9	9.75,6.9		9.58333	7	7.1	9.58,7.1		9.5	7.1	7.2	9.5,7.2		9.375	7.2	7.3	9.375,7.3		10.8333	5.7	5.9	10.83,5.9		11.25	5.3	5.3	11.25,5.3
9.3	8	8	9.3,8		9.375	7.9	8	9.38,8		9.5	7.8	7.8	9.5,7.8		9.375	7.9	8	9.38,8		9.75	7.5	7.6	9.75,7.6		9.58333	7.7	7.8	9.58,7.8		9.5	7.8	7.9	9.5,7.9		9.375	7.9	7.9	9.375,7.9		10.8333	6.4	6.5	10.83,6.5		11.25	6	6.2	11.25,6.2
9.5	3.9	3.9	9.5,3.9		9.625	3.7	3.8	9.63,3.8		9.5	3.9	3.9	9.5,3.9		9.79167	3.6	3.6	9.79,3.6		9.75	3.6	3.7	9.75,3.7		9.58333	3.8	4	9.58,4		9.5	3.9	4	9.5,4		10.625	2.7	2.8	10.625,2.8		10.8333	2.5	2.5	10.83,2.5		11.25	2.1	2.2	11.25,2.2
9.5	5.1	5.2	9.5,5.2		9.625	5	5.1	9.63,5.1		9.5	5.1	5.2	9.5,5.2		9.79167	4.8	4.8	9.79,4.8		9.75	4.9	4.9	9.75,4.9		9.58333	5.1	5.2	9.58,5.2		9.5	5.1	5.1	9.5,5.1		10.625	4	4.1	10.625,4.1		10.8333	3.8	3.8	10.83,3.8		11.25	3.4	3.4	11.25,3.4
9.7	8.2	8.3	9.7,8.3		9.875	8	8.1	9.88,8.1		9.83333	8	8.1	9.83,8.1		9.79167	8.1	8.1	9.79,8.1		9.75	8.1	8.2	9.75,8.2		10.4167	7.4	7.4	10.42,7.4		10.5	7.4	7.5	10.5,7.5		10.625	7.2	7.3	10.625,7.3		10.8333	7	7	10.83,7		11.25	6.6	6.7	11.25,6.7
9.9	3.6	3.7	9.9,3.7		10.125	3.3	3.4	10.13,3.4		10.1667	3.3	3.4	10.17,3.4		10.2083	3.3	3.3	10.21,3.3		10.25	3.2	3.2	10.25,3.2		10.4167	3.1	3.2	10.42,3.2		10.5	3	3	10.5,3		10.625	2.8	2.8	10.625,2.8		10.8333	2.6	2.7	10.83,2.7		11.25	2.2	2.2	11.25,2.2
9.9	6.1	6.2	9.9,6.2		10.125	5.9	6	10.13,6		10.1667	5.8	5.9	10.17,5.9		10.2083	5.8	5.9	10.21,5.9		10.25	5.8	5.9	10.25,5.9		10.4167	5.6	5.7	10.42,5.7		10.5	5.5	5.6	10.5,5.6		10.625	5.4	5.5	10.625,5.5		10.8333	5.2	5.4	10.83,5.4		11.25	4.8	5	11.25,5
9.9	7.4	7.5	9.9,7.5		10.125	7.2	7.2	10.13,7.2		10.1667	7.2	7.3	10.17,7.3		10.2083	7.1	7.2	10.21,7.2		10.25	7.1	7.3	10.25,7.3		10.4167	6.9	7	10.42,7		10.5	6.8	6.9	10.5,6.9		10.625	6.7	6.8	10.625,6.8		10.8333	6.5	6.5	10.83,6.5		11.25	6.1	6.2	11.25,6.2
10.3	6	6.1	10.3,6.1		10.375	5.9	6	10.38,6		10.5	5.8	5.9	10.5,5.9		10.625	5.7	5.7	10.63,5.7		10.75	5.6	5.7	10.75,5.7		10.4167	5.9	6	10.42,6		10.5	5.8	5.9	10.5,5.9		10.625	5.7	5.8	10.625,5.8		10.8333	5.5	5.5	10.83,5.5		11.25	5.1	5.1	11.25,5.1
10.3	6.3	6.4	10.3,6.4		10.375	6.2	6.3	10.38,6.3		10.5	6.1	6.2	10.5,6.2		10.625	5.9	6	10.63,6		10.75	5.8	5.9	10.75,5.9		10.4167	6.1	6.2	10.42,6.2		10.5	6.1	6.3	10.5,6.3		10.625	5.9	6	10.625,6		10.8333	5.7	5.9	10.83,5.9		11.25	5.3	5.3	11.25,5.3
10.3	6.5	6.6	10.3,6.6		10.375	6.4	6.4	10.38,6.4		10.5	6.3	6.3	10.5,6.3		10.625	6.2	6.3	10.63,6.3		10.75	6.1	6.2	10.75,6.2		10.4167	6.4	6.5	10.42,6.5		10.5	6.3	6.4	10.5,6.4		10.625	6.2	6.3	10.625,6.3		10.8333	6	6	10.83,6		11.25	5.6	5.6	11.25,5.6
10.3	9.2	9.3	10.3,9.3		10.375	9.1	9.2	10.38,9.2		10.5	9	9.1	10.5,9.1		10.625	8.8	8.9	10.63,8.9		10.75	8.7	8.8	10.75,8.8		10.4167	9	9	10.42,9		10.5	9	9.1	10.5,9.1		10.625	8.8	8.9	10.625,8.9		10.8333	8.6	8.7	10.83,8.7		11.25	8.2	8.2	11.25,8.2
10.5	5	5.1	10.5,5.1		10.625	4.9	5	10.63,5		10.5	5	5	10.5,5		10.625	4.9	5	10.63,5		10.75	4.8	4.9	10.75,4.9		11.25	4.3	4.4	11.25,4.4		10.5	5	5.1	10.5,5.1		10.625	4.9	5	10.625,5		10.8333	4.7	4.9	10.83,4.9		11.25	4.3	4.4	11.25,4.4
10.5	6.3	6.4	10.5,6.4		10.625	6.1	6.2	10.63,6.2		10.5	6.3	6.3	10.5,6.3		10.625	6.1	6.2	10.63,6.2		10.75	6	6	10.75,6		11.25	5.5	5.5	11.25,5.5		10.5	6.3	6.4	10.5,6.4		10.625	6.1	6.1	10.625,6.1		10.8333	5.9	6	10.83,6		11.25	5.5	5.6	11.25,5.6
10.5	7.1	7.1	10.5,7.1		10.625	7	7.1	10.63,7.1		10.5	7.1	7.1	10.5,7.1		10.625	7	7.1	10.63,7.1		10.75	6.9	6.9	10.75,6.9		11.25	6.4	6.5	11.25,6.5		10.5	7.1	7.2	10.5,7.2		10.625	7	7.1	10.625,7.1		10.8333	6.8	6.9	10.83,6.9		11.25	6.4	6.5	11.25,6.5
10.7	4.3	4.3	10.7,4.3		10.875	4.1	4.2	10.88,4.2		10.8333	4.2	4.2	10.83,4.2		11.0417	4	4.1	11.04,4.1		10.75	4.3	4.3	10.75,4.3		11.25	3.8	4	11.25,4		11.5	3.5	3.5	11.5,3.5		11.875	3.1	3.1	11.875,3.1		10.8333	4.2	4.4	10.83,4.4		11.25	3.8	3.9	11.25,3.9
10.7	4.9	5	10.7,5		10.875	4.8	4.8	10.88,4.8		10.8333	4.8	4.9	10.83,4.9		11.0417	4.6	4.7	11.04,4.7		10.75	4.9	4.9	10.75,4.9		11.25	4.4	4.4	11.25,4.4		11.5	4.1	4.2	11.5,4.2		11.875	3.8	3.8	11.875,3.8		10.8333	4.8	4.9	10.83,4.9		11.25	4.4	4.4	11.25,4.4
10.7	6.7	6.7	10.7,6.7		10.875	6.6	6.7	10.88,6.7		10.8333	6.6	6.7	10.83,6.7		11.0417	6.4	6.5	11.04,6.5		10.75	6.7	6.8	10.75,6.8		11.25	6.2	6.3	11.25,6.3		11.5	5.9	5.9	11.5,5.9		11.875	5.6	5.6	11.875,5.6		10.8333	6.6	6.7	10.83,6.7		11.25	6.2	6.3	11.25,6.3
10.7	7.1	7.1	10.7,7.1		10.875	6.9	6.9	10.88,6.9		10.8333	7	7	10.83,7		11.0417	6.8	6.9	11.04,6.9		10.75	7.1	7.3	10.75,7.3		11.25	6.6	6.6	11.25,6.6		11.5	6.3	6.4	11.5,6.4		11.875	5.9	6	11.875,6		10.8333	7	7	10.83,7		11.25	6.6	6.7	11.25,6.7
10.9	4.1	4.2	10.9,4.2		11.125	3.9	3.9	11.13,3.9		11.1667	3.9	3.9	11.17,3.9		11.0417	4	4.1	11.04,4.1		11.25	3.8	3.9	11.25,3.9		11.25	3.8	4	11.25,4		11.5	3.5	3.5	11.5,3.5		11.875	3.1	3.1	11.875,3.1		12.5	2.5	2.5	12.5,2.5		11.25	3.8	3.9	11.25,3.9
10.9	5.3	5.3	10.9,5.3		11.125	5	5.1	11.13,5.1		11.1667	5	5	11.17,5		11.0417	5.1	5.1	11.04,5.1		11.25	4.9	4.9	11.25,4.9		11.25	4.9	4.9	11.25,4.9		11.5	4.7	4.8	11.5,4.8		11.875	4.3	4.3	11.875,4.3		12.5	3.7	3.8	12.5,3.8		11.25	4.9	5	11.25,5
10.9	7	7.1	10.9,7.1		11.125	6.7	6.8	11.13,6.8		11.1667	6.7	6.7	11.17,6.7		11.0417	6.8	6.9	11.04,6.9		11.25	6.6	6.6	11.25,6.6		11.25	6.6	6.6	11.25,6.6		11.5	6.4	6.4	11.5,6.4		11.875	6	6.1	11.875,6.1		12.5	5.4	5.5	12.5,5.5		11.25	6.6	6.7	11.25,6.7
11.1	5.5	5.6	11.1,5.6		11.125	5.4	5.5	11.13,5.5		11.1667	5.4	5.5	11.17,5.5		11.4583	5.1	5.1	11.46,5.1		11.25	5.3	5.4	11.25,5.4		11.25	5.3	5.4	11.25,5.4		11.5	5.1	5.1	11.5,5.1		11.875	4.7	4.8	11.875,4.8		12.5	4.1	4.2	12.5,4.2		11.25	5.3	5.3	11.25,5.3
11.1	5.6	5.7	11.1,5.7		11.125	5.6	5.6	11.13,5.6		11.1667	5.5	5.6	11.17,5.6		11.4583	5.2	5.3	11.46,5.3		11.25	5.4	5.6	11.25,5.6		11.25	5.4	5.5	11.25,5.5		11.5	5.2	5.3	11.5,5.3		11.875	4.8	5	11.875,5		12.5	4.2	4.4	12.5,4.4		11.25	5.4	5.5	11.25,5.5
11.1	6.4	6.5	11.1,6.5		11.125	6.4	6.4	11.13,6.4		11.1667	6.4	6.4	11.17,6.4		11.4583	6.1	6.2	11.46,6.2		11.25	6.3	6.3	11.25,6.3		11.25	6.3	6.3	11.25,6.3		11.5	6	6.1	11.5,6.1		11.875	5.6	5.6	11.875,5.6		12.5	5	5	12.5,5		11.25	6.3	6.3	11.25,6.3
11.1	6.8	6.9	11.1,6.9		11.125	6.8	6.8	11.13,6.8		11.1667	6.7	6.7	11.17,6.7		11.4583	6.4	6.5	11.46,6.5		11.25	6.6	6.6	11.25,6.6		11.25	6.6	6.6	11.25,6.6		11.5	6.4	6.4	11.5,6.4		11.875	6	6.1	11.875,6.1		12.5	5.4	5.5	12.5,5.5		11.25	6.6	6.7	11.25,6.7
11.3	4.6	4.7	11.3,4.7		11.375	4.5	4.6	11.38,4.6		11.5	4.4	4.5	11.5,4.5		11.4583	4.4	4.5	11.46,4.5		11.75	4.1	4.2	11.75,4.2		12.0833	3.8	4	12.08,4		11.5	4.4	4.5	11.5,4.5		11.875	4	4.1	11.875,4.1		12.5	3.4	3.5	12.5,3.5		13.75	2.1	2.2	13.75,2.2
11.3	6	6.1	11.3,6.1		11.375	5.9	6	11.38,6		11.5	5.8	5.9	11.5,5.9		11.4583	5.8	5.9	11.46,5.9		11.75	5.5	5.6	11.75,5.6		12.0833	5.2	5.2	12.08,5.2		11.5	5.8	5.9	11.5,5.9		11.875	5.4	5.5	11.875,5.5		12.5	4.8	4.9	12.5,4.9		13.75	3.5	3.6	13.75,3.6
11.3	6.1	6.2	11.3,6.2		11.375	6.1	6.2	11.38,6.2		11.5	5.9	6	11.5,6		11.4583	6	6	11.46,6		11.75	5.7	5.7	11.75,5.7		12.0833	5.4	5.5	12.08,5.5		11.5	5.9	5.9	11.5,5.9		11.875	5.6	5.6	11.875,5.6		12.5	4.9	5	12.5,5		13.75	3.7	3.8	13.75,3.8
11.3	7.9	8	11.3,8		11.375	7.9	8	11.38,8		11.5	7.7	7.7	11.5,7.7		11.4583	7.8	7.8	11.46,7.8		11.75	7.5	7.6	11.75,7.6		12.0833	7.2	7.3	12.08,7.3		11.5	7.7	7.9	11.5,7.9		11.875	7.4	7.4	11.875,7.4		12.5	6.7	6.9	12.5,6.9		13.75	5.5	5.6	13.75,5.6
11.5	4.9	5	11.5,5		11.625	4.8	4.8	11.63,4.8		11.5	4.9	4.9	11.5,4.9		11.875	4.5	4.5	11.88,4.5		11.75	4.7	4.8	11.75,4.8		12.0833	4.3	4.4	12.08,4.4		11.5	4.9	5	11.5,5		11.875	4.5	4.6	11.875,4.6		12.5	3.9	4	12.5,4		13.75	2.7	2.7	13.75,2.7
11.5	5.8	5.8	11.5,5.8		11.625	5.7	5.8	11.63,5.8		11.5	5.8	5.9	11.5,5.9		11.875	5.4	5.4	11.88,5.4		11.75	5.5	5.6	11.75,5.6		12.0833	5.2	5.2	12.08,5.2		11.5	5.8	5.9	11.5,5.9		11.875	5.4	5.5	11.875,5.5		12.5	4.8	4.9	12.5,4.9		13.75	3.5	3.6	13.75,3.6
11.5	7	7.1	11.5,7.1		11.625	6.9	6.9	11.63,6.9		11.5	7	7	11.5,7		11.875	6.6	6.6	11.88,6.6		11.75	6.7	6.8	11.75,6.8		12.0833	6.4	6.5	12.08,6.5		11.5	7	7.1	11.5,7.1		11.875	6.6	6.6	11.875,6.6		12.5	6	6	12.5,6		13.75	4.7	4.8	13.75,4.8
11.5	7.4	7.5	11.5,7.5		11.625	7.3	7.3	11.63,7.3		11.5	7.4	7.4	11.5,7.4		11.875	7	7.1	11.88,7.1		11.75	7.2	7.3	11.75,7.3		12.0833	6.8	6.8	12.08,6.8		11.5	7.4	7.5	11.5,7.5		11.875	7	7.1	11.875,7.1		12.5	6.4	6.5	12.5,6.5		13.75	5.2	5.3	13.75,5.3
11.5	7.7	7.7	11.5,7.7		11.625	7.6	7.7	11.63,7.7		11.5	7.7	7.7	11.5,7.7		11.875	7.3	7.4	11.88,7.4		11.75	7.4	7.4	11.75,7.4		12.0833	7.1	7.1	12.08,7.1		11.5	7.7	7.9	11.5,7.9		11.875	7.3	7.4	11.875,7.4		12.5	6.7	6.9	12.5,6.9		13.75	5.4	5.5	13.75,5.5
11.7	5.2	5.2	11.7,5.2		11.875	5.1	5.1	11.88,5.1		11.8333	5.1	5.2	11.83,5.2		11.875	5.1	5.1	11.88,5.1		11.75	5.2	5.2	11.75,5.2		12.0833	4.9	4.9	12.08,4.9		12.5	4.4	4.5	12.5,4.5		11.875	5.1	5.1	11.875,5.1		12.5	4.4	4.5	12.5,4.5		13.75	3.2	3.3	13.75,3.3
11.7	7.7	7.7	11.7,7.7		11.875	7.5	7.6	11.88,7.6		11.8333	7.6	7.7	11.83,7.7		11.875	7.5	7.5	11.88,7.5		11.75	7.7	7.7	11.75,7.7		12.0833	7.3	7.4	12.08,7.4		12.5	6.9	7.1	12.5,7.1		11.875	7.5	7.6	11.875,7.6		12.5	6.9	7	12.5,7		13.75	5.7	5.8	13.75,5.8
11.7	8	8	11.7,8		11.875	7.8	7.9	11.88,7.9		11.8333	7.9	8	11.83,8		11.875	7.8	7.8	11.88,7.8		11.75	8	8	11.75,8		12.0833	7.6	7.8	12.08,7.8		12.5	7.2	7.2	12.5,7.2		11.875	7.8	7.9	11.875,7.9		12.5	7.2	7.4	12.5,7.4		13.75	6	6.2	13.75,6.2
11.9	5.5	5.6	11.9,5.6		12.125	5.2	5.2	12.13,5.2		12.1667	5.2	5.3	12.17,5.3		12.2917	5.1	5.1	12.29,5.1		12.25	5.1	5.2	12.25,5.2		12.0833	5.3	5.4	12.08,5.4		12.5	4.9	5	12.5,5		13.125	4.2	4.3	13.125,4.3		12.5	4.9	5	12.5,5		13.75	3.6	3.8	13.75,3.8
11.9	5.8	5.8	11.9,5.8		12.125	5.6	5.6	12.13,5.6		12.1667	5.5	5.6	12.17,5.6		12.2917	5.4	5.4	12.29,5.4		12.25	5.5	5.6	12.25,5.6		12.0833	5.6	5.7	12.08,5.7		12.5	5.2	5.3	12.5,5.3		13.125	4.6	4.6	13.125,4.6		12.5	5.2	5.4	12.5,5.4		13.75	4	4.1	13.75,4.1
11.9	6.2	6.2	11.9,6.2		12.125	6	6	12.13,6		12.1667	5.9	6	12.17,6		12.2917	5.8	5.9	12.29,5.9		12.25	5.8	5.9	12.25,5.9		12.0833	6	6	12.08,6		12.5	5.6	5.6	12.5,5.6		13.125	5	5.1	13.125,5.1		12.5	5.6	5.7	12.5,5.7		13.75	4.3	4.4	13.75,4.4
11.9	6.4	6.5	11.9,6.5		12.125	6.1	6.2	12.13,6.2		12.1667	6.1	6.2	12.17,6.2		12.2917	6	6	12.29,6		12.25	6	6	12.25,6		12.0833	6.2	6.3	12.08,6.3		12.5	5.8	5.9	12.5,5.9		13.125	5.1	5.1	13.125,5.1		12.5	5.8	5.9	12.5,5.9		13.75	4.5	4.6	13.75,4.6
11.9	7.1	7.1	11.9,7.1		12.125	6.9	6.9	12.13,6.9		12.1667	6.8	6.9	12.17,6.9		12.2917	6.7	6.8	12.29,6.8		12.25	6.8	6.9	12.25,6.9		12.0833	6.9	7	12.08,7		12.5	6.5	6.6	12.5,6.6		13.125	5.9	6	13.125,6		12.5	6.5	6.5	12.5,6.5		13.75	5.3	5.3	13.75,5.3
12.1	4.3	4.3	12.1,4.3		12.125	4.2	4.3	12.13,4.3		12.1667	4.2	4.2	12.17,4.2		12.2917	4.1	4.2	12.29,4.2		12.25	4.1	4.2	12.25,4.2		12.9167	3.4	3.5	12.92,3.5		12.5	3.9	4	12.5,4		13.125	3.2	3.3	13.125,3.3		12.5	3.9	4	12.5,4		13.75	2.6	2.7	13.75,2.7
12.1	6	6.1	12.1,6.1		12.125	6	6	12.13,6		12.1667	5.9	6	12.17,6		12.2917	5.8	5.9	12.29,5.9		12.25	5.8	5.9	12.25,5.9		12.9167	5.2	5.2	12.92,5.2		12.5	5.6	5.6	12.5,5.6		13.125	5	5.1	13.125,5.1		12.5	5.6	5.7	12.5,5.7		13.75	4.3	4.4	13.75,4.4
12.1	6.1	6.2	12.1,6.2		12.125	6.1	6.2	12.13,6.2		12.1667	6	6	12.17,6		12.2917	5.9	6	12.29,6		12.25	5.9	6	12.25,6		12.9167	5.3	5.4	12.92,5.4		12.5	5.7	5.8	12.5,5.8		13.125	5.1	5.1	13.125,5.1		12.5	5.7	5.9	12.5,5.9		13.75	4.4	4.4	13.75,4.4
12.1	6.4	6.5	12.1,6.5		12.125	6.4	6.4	12.13,6.4		12.1667	6.4	6.4	12.17,6.4		12.2917	6.2	6.3	12.29,6.3		12.25	6.3	6.3	12.25,6.3		12.9167	5.6	5.7	12.92,5.7		12.5	6	6.1	12.5,6.1		13.125	5.4	5.5	13.125,5.5		12.5	6	6	12.5,6		13.75	4.8	5	13.75,5
12.1	6.8	6.9	12.1,6.9		12.125	6.8	6.8	12.13,6.8		12.1667	6.8	6.9	12.17,6.9		12.2917	6.6	6.6	12.29,6.6		12.25	6.7	6.8	12.25,6.8		12.9167	6	6	12.92,6		12.5	6.4	6.4	12.5,6.4		13.125	5.8	6	13.125,6		12.5	6.4	6.5	12.5,6.5		13.75	5.2	5.3	13.75,5.3
12.1	8	8	12.1,8		12.125	7.9	8	12.13,8		12.1667	7.9	8	12.17,8		12.2917	7.8	7.8	12.29,7.8		12.25	7.8	7.9	12.25,7.9		12.9167	7.1	7.1	12.92,7.1		12.5	7.6	7.7	12.5,7.7		13.125	6.9	6.9	13.125,6.9		12.5	7.6	7.7	12.5,7.7		13.75	6.3	6.3	13.75,6.3
12.3	5.3	5.3	12.3,5.3		12.375	5.2	5.2	12.38,5.2		12.5	5.1	5.2	12.5,5.2		12.7083	4.9	5	12.71,5		12.75	4.9	4.9	12.75,4.9		12.9167	4.7	4.7	12.92,4.7		12.5	5.1	5.1	12.5,5.1		13.125	4.5	4.6	13.125,4.6		12.5	5.1	5.2	12.5,5.2		13.75	3.9	3.9	13.75,3.9
12.3	7	7.1	12.3,7.1		12.375	6.9	6.9	12.38,6.9		12.5	6.8	6.9	12.5,6.9		12.7083	6.6	6.6	12.71,6.6		12.75	6.5	6.6	12.75,6.6		12.9167	6.4	6.5	12.92,6.5		12.5	6.8	6.9	12.5,6.9		13.125	6.1	6.1	13.125,6.1		12.5	6.8	6.9	12.5,6.9		13.75	5.5	5.6	13.75,5.6
12.3	8	8	12.3,8		12.375	7.9	8	12.38,8		12.5	7.8	7.8	12.5,7.8		12.7083	7.5	7.5	12.71,7.5		12.75	7.5	7.6	12.75,7.6		12.9167	7.3	7.4	12.92,7.4		12.5	7.8	7.9	12.5,7.9		13.125	7.1	7.1	13.125,7.1		12.5	7.8	7.9	12.5,7.9		13.75	6.5	6.5	13.75,6.5
12.3	8.7	8.8	12.3,8.8		12.375	8.6	8.6	12.38,8.6		12.5	8.5	8.5	12.5,8.5		12.7083	8.3	8.4	12.71,8.4		12.75	8.3	8.3	12.75,8.3		12.9167	8.1	8.2	12.92,8.2		12.5	8.5	8.7	12.5,8.7		13.125	7.9	7.9	13.125,7.9		12.5	8.5	8.5	12.5,8.5		13.75	7.3	7.4	13.75,7.4
12.5	3.7	3.8	12.5,3.8		12.625	3.5	3.5	12.63,3.5		12.5	3.7	3.8	12.5,3.8		12.7083	3.5	3.6	12.71,3.6		12.75	3.4	3.5	12.75,3.5		12.9167	3.3	3.3	12.92,3.3		12.5	3.7	3.8	12.5,3.8		13.125	3	3.1	13.125,3.1		12.5	3.7	3.8	12.5,3.8		13.75	2.4	2.6	13.75,2.6
12.5	6.9	7	12.5,7		12.625	6.8	6.8	12.63,6.8		12.5	6.9	7	12.5,7		12.7083	6.7	6.8	12.71,6.8		12.75	6.7	6.8	12.75,6.8		12.9167	6.5	6.6	12.92,6.6		12.5	6.9	7.1	12.5,7.1		13.125	6.3	6.5	13.125,6.5		12.5	6.9	7	12.5,7		13.75	5.7	5.8	13.75,5.8
12.5	7.7	7.7	12.5,7.7		12.625	7.6	7.7	12.63,7.7		12.5	7.7	7.7	12.5,7.7		12.7083	7.5	7.5	12.71,7.5		12.75	7.4	7.4	12.75,7.4		12.9167	7.3	7.4	12.92,7.4		12.5	7.7	7.9	12.5,7.9		13.125	7.1	7.1	13.125,7.1		12.5	7.7	7.9	12.5,7.9		13.75	6.4	6.5	13.75,6.5
12.7	5.2	5.2	12.7,5.2		12.875	5	5.1	12.88,5.1		12.8333	5	5	12.83,5		12.7083	5.2	5.3	12.71,5.3		12.75	5.1	5.2	12.75,5.2		12.9167	4.9	4.9	12.92,4.9		13.5	4.4	4.5	13.5,4.5		13.125	4.7	4.8	13.125,4.8		14.1667	3.7	3.8	14.17,3.8		13.75	4.1	4.1	13.75,4.1
12.7	5.9	6	12.7,6		12.875	5.7	5.8	12.88,5.8		12.8333	5.8	5.9	12.83,5.9		12.7083	5.9	6	12.71,6		12.75	5.9	6	12.75,6		12.9167	5.7	5.9	12.92,5.9		13.5	5.1	5.1	13.5,5.1		13.125	5.5	5.6	13.125,5.6		14.1667	4.4	4.5	14.17,4.5		13.75	4.9	5	13.75,5
12.7	7.3	7.4	12.7,7.4		12.875	7.1	7.2	12.88,7.2		12.8333	7.1	7.1	12.83,7.1		12.7083	7.3	7.4	12.71,7.4		12.75	7.2	7.3	12.75,7.3		12.9167	7.1	7.1	12.92,7.1		13.5	6.5	6.6	13.5,6.6		13.125	6.9	6.9	13.125,6.9		14.1667	5.8	5.9	14.17,5.9		13.75	6.2	6.3	13.75,6.3
12.7	8	8	12.7,8		12.875	7.8	7.9	12.88,7.9		12.8333	7.8	7.8	12.83,7.8		12.7083	7.9	8	12.71,8		12.75	7.9	8	12.75,8		12.9167	7.7	7.8	12.92,7.8		13.5	7.2	7.2	13.5,7.2		13.125	7.5	7.6	13.125,7.6		14.1667	6.5	6.5	14.17,6.5		13.75	6.9	7	13.75,7
12.9	6	6.1	12.9,6.1		13.125	5.8	5.9	13.13,5.9		13.1667	5.7	5.7	13.17,5.7		13.125	5.8	5.9	13.13,5.9		13.25	5.6	5.7	13.25,5.7		12.9167	6	6	12.92,6		13.5	5.4	5.5	13.5,5.5		13.125	5.8	6	13.125,6		14.1667	4.7	4.9	14.17,4.9		13.75	5.1	5.1	13.75,5.1
12.9	6.2	6.2	12.9,6.2		13.125	6	6	13.13,6		13.1667	5.9	6	13.17,6		13.125	6	6	13.13,6		13.25	5.9	6	13.25,6		12.9167	6.2	6.3	12.92,6.3		13.5	5.6	5.6	13.5,5.6		13.125	6	6.1	13.125,6.1		14.1667	4.9	5	14.17,5		13.75	5.4	5.5	13.75,5.5
12.9	6.5	6.6	12.9,6.6		13.125	6.3	6.4	13.13,6.4		13.1667	6.3	6.3	13.17,6.3		13.125	6.3	6.3	13.13,6.3		13.25	6.2	6.3	13.25,6.3		12.9167	6.5	6.6	12.92,6.6		13.5	5.9	5.9	13.5,5.9		13.125	6.3	6.5	13.125,6.5		14.1667	5.3	5.4	14.17,5.4		13.75	5.7	5.8	13.75,5.8
12.9	6.9	7	12.9,7		13.125	6.7	6.8	13.13,6.8		13.1667	6.6	6.7	13.17,6.7		13.125	6.7	6.8	13.13,6.8		13.25	6.6	6.6	13.25,6.6		12.9167	6.9	7	12.92,7		13.5	6.3	6.4	13.5,6.4		13.125	6.7	6.8	13.125,6.8		14.1667	5.6	5.7	14.17,5.7		13.75	6.1	6.2	13.75,6.2
12.9	7.5	7.6	12.9,7.6		13.125	7.3	7.3	13.13,7.3		13.1667	7.2	7.3	13.17,7.3		13.125	7.3	7.4	13.13,7.4		13.25	7.1	7.3	13.25,7.3		12.9167	7.5	7.6	12.92,7.6		13.5	6.9	7.1	13.5,7.1		13.125	7.3	7.4	13.125,7.4		14.1667	6.2	6.4	14.17,6.4		13.75	6.6	6.7	13.75,6.7
13.1	6.7	6.7	13.1,6.7		13.125	6.7	6.8	13.13,6.8		13.1667	6.7	6.7	13.17,6.7		13.125	6.7	6.8	13.13,6.8		13.25	6.6	6.6	13.25,6.6		13.75	6.1	6.2	13.75,6.2		13.5	6.3	6.4	13.5,6.4		13.125	6.7	6.8	13.125,6.8		14.1667	5.7	5.9	14.17,5.9		13.75	6.1	6.2	13.75,6.2
13.1	7.1	7.1	13.1,7.1		13.125	7.1	7.2	13.13,7.2		13.1667	7	7	13.17,7		13.125	7.1	7.2	13.13,7.2		13.25	6.9	6.9	13.25,6.9		13.75	6.4	6.5	13.75,6.5		13.5	6.7	6.7	13.5,6.7		13.125	7.1	7.1	13.125,7.1		14.1667	6	6	14.17,6		13.75	6.4	6.5	13.75,6.5
13.3	7.2	7.2	13.3,7.2		13.375	7.1	7.2	13.38,7.2		13.5	7	7	13.5,7		13.5417	6.9	6.9	13.54,6.9		13.75	6.7	6.8	13.75,6.8		13.75	6.7	6.8	13.75,6.8		13.5	7	7.1	13.5,7.1		14.375	6.1	6.1	14.375,6.1		14.1667	6.3	6.4	14.17,6.4		13.75	6.7	6.8	13.75,6.8
13.3	8.8	8.9	13.3,8.9		13.375	8.8	8.9	13.38,8.9		13.5	8.6	8.7	13.5,8.7		13.5417	8.6	8.7	13.54,8.7		13.75	8.4	8.5	13.75,8.5		13.75	8.4	8.5	13.75,8.5		13.5	8.6	8.7	13.5,8.7		14.375	7.8	7.9	14.375,7.9		14.1667	8	8	14.17,8		13.75	8.4	8.6	13.75,8.6
13.5	7.5	7.6	13.5,7.6		13.625	7.3	7.3	13.63,7.3		13.5	7.5	7.6	13.5,7.6		13.5417	7.4	7.5	13.54,7.5		13.75	7.2	7.3	13.75,7.3		13.75	7.2	7.3	13.75,7.3		13.5	7.5	7.5	13.5,7.5		14.375	6.6	6.6	14.375,6.6		14.1667	6.8	6.9	14.17,6.9		13.75	7.2	7.4	13.75,7.4
13.5	7.9	8	13.5,8		13.625	7.7	7.7	13.63,7.7		13.5	7.9	8	13.5,8		13.5417	7.8	7.8	13.54,7.8		13.75	7.6	7.7	13.75,7.7		13.75	7.6	7.8	13.75,7.8		13.5	7.9	8	13.5,8		14.375	7	7.1	14.375,7.1		14.1667	7.2	7.4	14.17,7.4		13.75	7.6	7.7	13.75,7.7
13.7	3.1	3.2	13.7,3.2		13.875	2.9	3	13.88,3		13.8333	3	3.1	13.83,3.1		13.9583	2.9	3	13.96,3		13.75	3.1	3.2	13.75,3.2		13.75	3.1	3.2	13.75,3.2		14.5	2.3	2.4	14.5,2.4		14.375	2.4	2.5	14.375,2.5		14.1667	2.6	2.7	14.17,2.7		13.75	3.1	3.3	13.75,3.3
13.7	5.4	5.5	13.7,5.5		13.875	5.2	5.2	13.88,5.2		13.8333	5.3	5.3	13.83,5.3		13.9583	5.2	5.3	13.96,5.3		13.75	5.4	5.6	13.75,5.6		13.75	5.4	5.5	13.75,5.5		14.5	4.6	4.6	14.5,4.6		14.375	4.7	4.8	14.375,4.8		14.1667	5	5	14.17,5		13.75	5.4	5.5	13.75,5.5
13.7	6.5	6.6	13.7,6.6		13.875	6.3	6.4	13.88,6.4		13.8333	6.4	6.4	13.83,6.4		13.9583	6.3	6.3	13.96,6.3		13.75	6.5	6.6	13.75,6.6		13.75	6.5	6.6	13.75,6.6		14.5	5.7	5.8	14.5,5.8		14.375	5.8	6	14.375,6		14.1667	6.1	6.2	14.17,6.2		13.75	6.5	6.5	13.75,6.5
13.7	6.7	6.7	13.7,6.7		13.875	6.5	6.6	13.88,6.6		13.8333	6.5	6.6	13.83,6.6		13.9583	6.4	6.5	13.96,6.5		13.75	6.6	6.6	13.75,6.6		13.75	6.6	6.6	13.75,6.6		14.5	5.9	5.9	14.5,5.9		14.375	6	6.1	14.375,6.1		14.1667	6.2	6.4	14.17,6.4		13.75	6.6	6.7	13.75,6.7
13.7	7.7	7.7	13.7,7.7		13.875	7.5	7.6	13.88,7.6		13.8333	7.5	7.6	13.83,7.6		13.9583	7.4	7.5	13.96,7.5		13.75	7.6	7.7	13.75,7.7		13.75	7.6	7.8	13.75,7.8		14.5	6.9	7.1	14.5,7.1		14.375	7	7.1	14.375,7.1		14.1667	7.2	7.4	14.17,7.4		13.75	7.6	7.7	13.75,7.7
13.9	5.2	5.2	13.9,5.2		14.125	5	5.1	14.13,5.1		14.1667	4.9	4.9	14.17,4.9		13.9583	5.1	5.1	13.96,5.1		14.25	4.8	4.9	14.25,4.9		14.5833	4.5	4.6	14.58,4.6		14.5	4.6	4.6	14.5,4.6		14.375	4.7	4.8	14.375,4.8		14.1667	4.9	5	14.17,5		16.25	2.8	2.9	16.25,2.9
13.9	5.6	5.7	13.9,5.7		14.125	5.4	5.5	14.13,5.5		14.1667	5.3	5.3	14.17,5.3		13.9583	5.5	5.6	13.96,5.6		14.25	5.3	5.4	14.25,5.4		14.5833	4.9	4.9	14.58,4.9		14.5	5	5.1	14.5,5.1		14.375	5.1	5.1	14.375,5.1		14.1667	5.3	5.4	14.17,5.4		16.25	3.3	3.4	16.25,3.4
13.9	6.8	6.9	13.9,6.9		14.125	6.6	6.7	14.13,6.7		14.1667	6.6	6.7	14.17,6.7		13.9583	6.8	6.9	13.96,6.9		14.25	6.5	6.6	14.25,6.6		14.5833	6.1	6.2	14.58,6.2		14.5	6.2	6.3	14.5,6.3		14.375	6.3	6.5	14.375,6.5		14.1667	6.6	6.7	14.17,6.7		16.25	4.5	4.6	16.25,4.6
13.9	7.7	7.7	13.9,7.7		14.125	7.5	7.6	14.13,7.6		14.1667	7.5	7.6	14.17,7.6		13.9583	7.7	7.8	13.96,7.8		14.25	7.4	7.4	14.25,7.4		14.5833	7	7.1	14.58,7.1		14.5	7.1	7.2	14.5,7.2		14.375	7.3	7.4	14.375,7.4		14.1667	7.5	7.5	14.17,7.5		16.25	5.4	5.5	16.25,5.5
14.1	4.7	4.8	14.1,4.8		14.125	4.7	4.7	14.13,4.7		14.1667	4.7	4.8	14.17,4.8		14.375	4.5	4.5	14.38,4.5		14.25	4.6	4.6	14.25,4.6		14.5833	4.3	4.4	14.58,4.4		14.5	4.3	4.3	14.5,4.3		14.375	4.5	4.6	14.375,4.6		14.1667	4.7	4.9	14.17,4.9		16.25	2.6	2.7	16.25,2.7
14.1	6.1	6.2	14.1,6.2		14.125	6.1	6.2	14.13,6.2		14.1667	6.1	6.2	14.17,6.2		14.375	5.9	6	14.38,6		14.25	6	6	14.25,6		14.5833	5.7	5.9	14.58,5.9		14.5	5.7	5.8	14.5,5.8		14.375	5.9	6	14.375,6		14.1667	6.1	6.2	14.17,6.2		16.25	4	4.1	16.25,4.1
14.1	6.3	6.4	14.1,6.4		14.125	6.3	6.4	14.13,6.4		14.1667	6.2	6.3	14.17,6.3		14.375	6	6	14.38,6		14.25	6.2	6.3	14.25,6.3		14.5833	5.8	5.9	14.58,5.9		14.5	5.9	5.9	14.5,5.9		14.375	6	6.1	14.375,6.1		14.1667	6.2	6.4	14.17,6.4		16.25	4.2	4.3	16.25,4.3
14.1	6.5	6.6	14.1,6.6		14.125	6.4	6.4	14.13,6.4		14.1667	6.4	6.4	14.17,6.4		14.375	6.2	6.3	14.38,6.3		14.25	6.3	6.3	14.25,6.3		14.5833	6	6	14.58,6		14.5	6.1	6.3	14.5,6.3		14.375	6.2	6.3	14.375,6.3		14.1667	6.4	6.5	14.17,6.5		16.25	4.3	4.4	16.25,4.4
14.1	7.5	7.6	14.1,7.6		14.125	7.5	7.6	14.13,7.6		14.1667	7.4	7.4	14.17,7.4		14.375	7.2	7.2	14.38,7.2		14.25	7.4	7.4	14.25,7.4		14.5833	7	7.1	14.58,7.1		14.5	7.1	7.2	14.5,7.2		14.375	7.2	7.3	14.375,7.3		14.1667	7.4	7.5	14.17,7.5		16.25	5.4	5.5	16.25,5.5
14.1	7.8	7.9	14.1,7.9		14.125	7.7	7.7	14.13,7.7		14.1667	7.7	7.7	14.17,7.7		14.375	7.5	7.5	14.38,7.5		14.25	7.6	7.7	14.25,7.7		14.5833	7.3	7.4	14.58,7.4		14.5	7.4	7.5	14.5,7.5		14.375	7.5	7.6	14.375,7.6		14.1667	7.7	7.9	14.17,7.9		16.25	5.6	5.6	16.25,5.6
14.1	8.7	8.8	14.1,8.8		14.125	8.6	8.6	14.13,8.6		14.1667	8.6	8.7	14.17,8.7		14.375	8.4	8.4	14.38,8.4		14.25	8.5	8.6	14.25,8.6		14.5833	8.2	8.2	14.58,8.2		14.5	8.3	8.3	14.5,8.3		14.375	8.4	8.4	14.375,8.4		14.1667	8.6	8.7	14.17,8.7		16.25	6.5	6.5	16.25,6.5
14.1	9.5	9.5	14.1,9.5		14.125	9.5	9.6	14.13,9.6		14.1667	9.5	9.5	14.17,9.5		14.375	9.3	9.3	14.38,9.3		14.25	9.4	9.4	14.25,9.4		14.5833	9	9	14.58,9		14.5	9.1	9.1	14.5,9.1		14.375	9.3	9.4	14.375,9.4		14.1667	9.5	9.5	14.17,9.5		16.25	7.4	7.5	16.25,7.5
14.1	9.6	9.7	14.1,9.7		14.125	9.6	9.7	14.13,9.7		14.1667	9.5	9.5	14.17,9.5		14.375	9.3	9.3	14.38,9.3		14.25	9.4	9.4	14.25,9.4		14.5833	9.1	9.2	14.58,9.2		14.5	9.2	9.3	14.5,9.3		14.375	9.3	9.4	14.375,9.4		14.1667	9.5	9.5	14.17,9.5		16.25	7.4	7.5	16.25,7.5
14.3	4.6	4.7	14.3,4.7		14.375	4.5	4.6	14.38,4.6		14.5	4.4	4.5	14.5,4.5		14.375	4.5	4.5	14.38,4.5		14.75	4.1	4.2	14.75,4.2		14.5833	4.3	4.4	14.58,4.4		14.5	4.4	4.5	14.5,4.5		14.375	4.5	4.6	14.375,4.6		15.8333	3	3	15.83,3		16.25	2.6	2.7	16.25,2.7
14.3	5	5.1	14.3,5.1		14.375	4.9	5	14.38,5		14.5	4.8	4.9	14.5,4.9		14.375	4.9	5	14.38,5		14.75	4.5	4.6	14.75,4.6		14.5833	4.7	4.7	14.58,4.7		14.5	4.8	4.8	14.5,4.8		14.375	4.9	5	14.375,5		15.8333	3.5	3.5	15.83,3.5		16.25	3	3.1	16.25,3.1
14.3	5.9	6	14.3,6		14.375	5.8	5.9	14.38,5.9		14.5	5.7	5.7	14.5,5.7		14.375	5.8	5.9	14.38,5.9		14.75	5.4	5.6	14.75,5.6		14.5833	5.6	5.7	14.58,5.7		14.5	5.7	5.8	14.5,5.8		14.375	5.8	6	14.375,6		15.8333	4.3	4.4	15.83,4.4		16.25	3.9	3.9	16.25,3.9
14.3	6.3	6.4	14.3,6.4		14.375	6.2	6.3	14.38,6.3		14.5	6.1	6.2	14.5,6.2		14.375	6.2	6.3	14.38,6.3		14.75	5.8	5.9	14.75,5.9		14.5833	6	6	14.58,6		14.5	6.1	6.3	14.5,6.3		14.375	6.2	6.3	14.375,6.3		15.8333	4.7	4.9	15.83,4.9		16.25	4.3	4.4	16.25,4.4
14.5	3.7	3.8	14.5,3.8		14.625	3.6	3.7	14.63,3.7		14.5	3.7	3.8	14.5,3.8		14.7917	3.4	3.5	14.79,3.5		14.75	3.5	3.5	14.75,3.5		14.5833	3.7	3.8	14.58,3.8		14.5	3.7	3.8	14.5,3.8		15.625	2.6	2.6	15.625,2.6		15.8333	2.4	2.5	15.83,2.5		16.25	2	2.1	16.25,2.1
14.5	6.3	6.4	14.5,6.4		14.625	6.1	6.2	14.63,6.2		14.5	6.3	6.3	14.5,6.3		14.7917	6	6	14.79,6		14.75	6	6	14.75,6		14.5833	6.2	6.3	14.58,6.3		14.5	6.3	6.4	14.5,6.4		15.625	5.1	5.1	15.625,5.1		15.8333	4.9	5	15.83,5		16.25	4.5	4.6	16.25,4.6
14.5	7.1	7.1	14.5,7.1		14.625	7	7.1	14.63,7.1		14.5	7.1	7.1	14.5,7.1		14.7917	6.8	6.9	14.79,6.9		14.75	6.9	6.9	14.75,6.9		14.5833	7	7.1	14.58,7.1		14.5	7.1	7.2	14.5,7.2		15.625	6	6.1	15.625,6.1		15.8333	5.8	5.9	15.83,5.9		16.25	5.4	5.5	16.25,5.5
14.5	7.3	7.4	14.5,7.4		14.625	7.1	7.2	14.63,7.2		14.5	7.3	7.4	14.5,7.4		14.7917	7	7.1	14.79,7.1		14.75	7	7.1	14.75,7.1		14.5833	7.2	7.3	14.58,7.3		14.5	7.3	7.4	14.5,7.4		15.625	6.1	6.1	15.625,6.1		15.8333	5.9	6	15.83,6		16.25	5.5	5.6	16.25,5.6
14.7	5.2	5.2	14.7,5.2		14.875	5	5.1	14.88,5.1		14.8333	5	5	14.83,5		14.7917	5.1	5.1	14.79,5.1		14.75	5.1	5.2	14.75,5.2		15.4167	4.4	4.4	15.42,4.4		15.5	4.4	4.5	15.5,4.5		15.625	4.2	4.3	15.625,4.3		15.8333	4	4	15.83,4		16.25	3.6	3.8	16.25,3.8
14.7	5.6	5.7	14.7,5.7		14.875	5.4	5.5	14.88,5.5		14.8333	5.4	5.5	14.83,5.5		14.7917	5.5	5.6	14.79,5.6		14.75	5.5	5.6	14.75,5.6		15.4167	4.8	4.9	15.42,4.9		15.5	4.8	4.8	15.5,4.8		15.625	4.6	4.6	15.625,4.6		15.8333	4.4	4.5	15.83,4.5		16.25	4	4.1	16.25,4.1
14.7	7.8	7.9	14.7,7.9		14.875	7.6	7.7	14.88,7.7		14.8333	7.6	7.7	14.83,7.7		14.7917	7.7	7.8	14.79,7.8		14.75	7.7	7.7	14.75,7.7		15.4167	7	7.1	15.42,7.1		15.5	7	7.1	15.5,7.1		15.625	6.8	6.9	15.625,6.9		15.8333	6.6	6.7	15.83,6.7		16.25	6.2	6.3	16.25,6.3
14.9	3.3	3.3	14.9,3.3		15.125	3.1	3.1	15.13,3.1		15.1667	3	3.1	15.17,3.1		15.2083	3	3	15.21,3		15.25	3	3.1	15.25,3.1		15.4167	2.8	2.8	15.42,2.8		15.5	2.7	2.7	15.5,2.7		15.625	2.6	2.6	15.625,2.6		15.8333	2.4	2.5	15.83,2.5		16.25	2	2.1	16.25,2.1
14.9	4.4	4.4	14.9,4.4		15.125	4.1	4.2	15.13,4.2		15.1667	4.1	4.2	15.17,4.2		15.2083	4.1	4.2	15.21,4.2		15.25	4	4	15.25,4		15.4167	3.9	4	15.42,4		15.5	3.8	3.8	15.5,3.8		15.625	3.6	3.6	15.625,3.6		15.8333	3.4	3.5	15.83,3.5		16.25	3	3.1	16.25,3.1
14.9	6.5	6.6	14.9,6.6		15.125	6.3	6.4	15.13,6.4		15.1667	6.3	6.3	15.17,6.3		15.2083	6.2	6.3	15.21,6.3		15.25	6.2	6.3	15.25,6.3		15.4167	6	6	15.42,6		15.5	5.9	5.9	15.5,5.9		15.625	5.8	6	15.625,6		15.8333	5.6	5.7	15.83,5.7		16.25	5.2	5.3	16.25,5.3
14.9	7.1	7.1	14.9,7.1		15.125	6.9	6.9	15.13,6.9		15.1667	6.8	6.9	15.17,6.9		15.2083	6.8	6.9	15.21,6.9		15.25	6.8	6.9	15.25,6.9		15.4167	6.6	6.6	15.42,6.6		15.5	6.5	6.6	15.5,6.6		15.625	6.4	6.5	15.625,6.5		15.8333	6.2	6.4	15.83,6.4		16.25	5.8	5.8	16.25,5.8
14.9	7.6	7.6	14.9,7.6		15.125	7.4	7.5	15.13,7.5		15.1667	7.3	7.4	15.17,7.4		15.2083	7.3	7.4	15.21,7.4		15.25	7.3	7.4	15.25,7.4		15.4167	7.1	7.1	15.42,7.1		15.5	7	7.1	15.5,7.1		15.625	6.9	6.9	15.625,6.9		15.8333	6.7	6.9	15.83,6.9		16.25	6.3	6.3	16.25,6.3
15.1	5.4	5.5	15.1,5.5		15.125	5.4	5.5	15.13,5.5		15.1667	5.4	5.5	15.17,5.5		15.2083	5.3	5.4	15.21,5.4		15.25	5.3	5.4	15.25,5.4		15.4167	5.1	5.2	15.42,5.2		15.5	5	5.1	15.5,5.1		15.625	4.9	5	15.625,5		15.8333	4.7	4.9	15.83,4.9		16.25	4.3	4.4	16.25,4.4
15.1	6.2	6.2	15.1,6.2		15.125	6.2	6.3	15.13,6.3		15.1667	6.1	6.2	15.17,6.2		15.2083	6.1	6.2	15.21,6.2		15.25	6.1	6.2	15.25,6.2		15.4167	5.9	6	15.42,6		15.5	5.8	5.9	15.5,5.9		15.625	5.7	5.8	15.625,5.8		15.8333	5.5	5.5	15.83,5.5		16.25	5.1	5.1	16.25,5.1
15.3	5.8	5.8	15.3,5.8		15.375	5.8	5.9	15.38,5.9		15.5	5.6	5.6	15.5,5.6		15.625	5.5	5.6	15.63,5.6		15.75	5.4	5.6	15.75,5.6		15.4167	5.7	5.9	15.42,5.9		15.5	5.6	5.6	15.5,5.6		15.625	5.5	5.6	15.625,5.6		15.8333	5.3	5.4	15.83,5.4		16.25	4.9	5	16.25,5
15.3	6.8	6.9	15.3,6.9		15.375	6.8	6.8	15.38,6.8		15.5	6.6	6.7	15.5,6.7		15.625	6.5	6.6	15.63,6.6		15.75	6.4	6.5	15.75,6.5		15.4167	6.7	6.8	15.42,6.8		15.5	6.6	6.7	15.5,6.7		15.625	6.5	6.6	15.625,6.6		15.8333	6.3	6.4	15.83,6.4		16.25	5.9	6	16.25,6
15.3	7.9	8	15.3,8		15.375	7.8	7.9	15.38,7.9		15.5	7.7	7.7	15.5,7.7		15.625	7.6	7.7	15.63,7.7		15.75	7.4	7.4	15.75,7.4		15.4167	7.8	7.9	15.42,7.9		15.5	7.7	7.9	15.5,7.9		15.625	7.6	7.6	15.625,7.6		15.8333	7.3	7.4	15.83,7.4		16.25	6.9	7	16.25,7
15.3	8.3	8.4	15.3,8.4		15.375	8.3	8.4	15.38,8.4		15.5	8.1	8.1	15.5,8.1		15.625	8	8.1	15.63,8.1		15.75	7.9	8	15.75,8		15.4167	8.2	8.2	15.42,8.2		15.5	8.1	8.2	15.5,8.2		15.625	8	8.1	15.625,8.1		15.8333	7.8	7.9	15.83,7.9		16.25	7.4	7.5	16.25,7.5
15.5	5.2	5.2	15.5,5.2		15.625	5.1	5.1	15.63,5.1		15.5	5.2	5.3	15.5,5.3		15.625	5.1	5.1	15.63,5.1		15.75	5	5.1	15.75,5.1		16.25	4.5	4.6	16.25,4.6		15.5	5.2	5.3	15.5,5.3		15.625	5.1	5.1	15.625,5.1		15.8333	4.9	5	15.83,5		16.25	4.5	4.6	16.25,4.6
15.5	5.7	5.7	15.5,5.7		15.625	5.5	5.5	15.63,5.5		15.5	5.7	5.7	15.5,5.7		15.625	5.5	5.6	15.63,5.6		15.75	5.4	5.6	15.75,5.6		16.25	4.9	4.9	16.25,4.9		15.5	5.7	5.8	15.5,5.8		15.625	5.5	5.6	15.625,5.6		15.8333	5.3	5.4	15.83,5.4		16.25	4.9	5	16.25,5
15.5	6.8	6.9	15.5,6.9		15.625	6.7	6.8	15.63,6.8		15.5	6.8	6.9	15.5,6.9		15.625	6.7	6.8	15.63,6.8		15.75	6.6	6.6	15.75,6.6		16.25	6.1	6.2	16.25,6.2		15.5	6.8	6.9	15.5,6.9		15.625	6.7	6.8	15.625,6.8		15.8333	6.5	6.5	15.83,6.5		16.25	6.1	6.2	16.25,6.2
15.7	6.2	6.2	15.7,6.2		15.875	6	6	15.88,6		15.8333	6.1	6.2	15.83,6.2		16.0417	5.9	6	16.04,6		15.75	6.2	6.3	15.75,6.3		16.25	5.7	5.9	16.25,5.9		16.5	5.4	5.5	16.5,5.5		16.875	5	5.1	16.875,5.1		15.8333	6.1	6.2	15.83,6.2		16.25	5.7	5.8	16.25,5.8
16.1	6.4	6.5	16.1,6.5		16.125	6.4	6.4	16.13,6.4		16.1667	6.4	6.4	16.17,6.4		16.4583	6.1	6.2	16.46,6.2		16.25	6.3	6.3	16.25,6.3		16.25	6.3	6.3	16.25,6.3		16.5	6	6.1	16.5,6.1		16.875	5.7	5.8	16.875,5.8		17.5	5	5	17.5,5		16.25	6.3	6.3	16.25,6.3
16.1	7.2	7.2	16.1,7.2		16.125	7.2	7.2	16.13,7.2		16.1667	7.1	7.1	16.17,7.1		16.4583	6.8	6.9	16.46,6.9		16.25	7.1	7.3	16.25,7.3		16.25	7.1	7.1	16.25,7.1		16.5	6.8	6.9	16.5,6.9		16.875	6.4	6.5	16.875,6.5		17.5	5.8	5.9	17.5,5.9		16.25	7.1	7.2	16.25,7.2
16.3	4.8	4.8	16.3,4.8		16.375	4.7	4.7	16.38,4.7		16.5	4.6	4.6	16.5,4.6		16.4583	4.6	4.7	16.46,4.7		16.75	4.3	4.3	16.75,4.3		17.0833	4	4.1	17.08,4.1		16.5	4.6	4.6	16.5,4.6		16.875	4.2	4.3	16.875,4.3		17.5	3.6	3.7	17.5,3.7		18.75	2.3	2.4	18.75,2.4
16.3	6.7	6.7	16.3,6.7		16.375	6.7	6.8	16.38,6.8		16.5	6.5	6.6	16.5,6.6		16.4583	6.6	6.6	16.46,6.6		16.75	6.3	6.3	16.75,6.3		17.0833	5.9	6	17.08,6		16.5	6.5	6.6	16.5,6.6		16.875	6.2	6.3	16.875,6.3		17.5	5.5	5.5	17.5,5.5		18.75	4.3	4.4	18.75,4.4
16.5	4.6	4.7	16.5,4.7		16.625	4.5	4.6	16.63,4.6		16.5	4.6	4.6	16.5,4.6		16.875	4.3	4.4	16.88,4.4		16.75	4.4	4.5	16.75,4.5		17.0833	4.1	4.1	17.08,4.1		16.5	4.6	4.6	16.5,4.6		16.875	4.3	4.3	16.875,4.3		17.5	3.6	3.7	17.5,3.7		18.75	2.4	2.6	18.75,2.6
16.5	6.7	6.7	16.5,6.7		16.625	6.5	6.6	16.63,6.6		16.5	6.7	6.7	16.5,6.7		16.875	6.3	6.3	16.88,6.3		16.75	6.4	6.5	16.75,6.5		17.0833	6.1	6.2	17.08,6.2		16.5	6.7	6.7	16.5,6.7		16.875	6.3	6.5	16.875,6.5		17.5	5.7	5.9	17.5,5.9		18.75	4.4	4.4	18.75,4.4
16.7	7.4	7.5	16.7,7.5		16.875	7.2	7.2	16.88,7.2		16.8333	7.3	7.4	16.83,7.4		16.875	7.2	7.2	16.88,7.2		16.75	7.4	7.4	16.75,7.4		17.0833	7	7.1	17.08,7.1		17.5	6.6	6.7	17.5,6.7		16.875	7.2	7.3	16.875,7.3		17.5	6.6	6.7	17.5,6.7		18.75	5.4	5.5	18.75,5.5
16.9	6.8	6.9	16.9,6.9		17.125	6.5	6.6	17.13,6.6		17.1667	6.5	6.6	17.17,6.6		17.2917	6.4	6.5	17.29,6.5		17.25	6.4	6.5	17.25,6.5		17.0833	6.6	6.6	17.08,6.6		17.5	6.2	6.3	17.5,6.3		18.125	5.5	5.6	18.125,5.6		17.5	6.2	6.4	17.5,6.4		18.75	4.9	5	18.75,5
16.9	7	7.1	16.9,7.1		17.125	6.8	6.8	17.13,6.8		17.1667	6.7	6.7	17.17,6.7		17.2917	6.6	6.6	17.29,6.6		17.25	6.6	6.6	17.25,6.6		17.0833	6.8	6.8	17.08,6.8		17.5	6.4	6.4	17.5,6.4		18.125	5.8	6	18.125,6		17.5	6.4	6.5	17.5,6.5		18.75	5.1	5.1	18.75,5.1
16.9	7.5	7.6	16.9,7.6		17.125	7.3	7.3	17.13,7.3		17.1667	7.3	7.4	17.17,7.4		17.2917	7.1	7.2	17.29,7.2		17.25	7.2	7.3	17.25,7.3		17.0833	7.3	7.4	17.08,7.4		17.5	6.9	7.1	17.5,7.1		18.125	6.3	6.5	18.125,6.5		17.5	6.9	7	17.5,7		18.75	5.7	5.8	18.75,5.8
17.1	6	6.1	17.1,6.1		17.125	5.9	6	17.13,6		17.1667	5.9	6	17.17,6		17.2917	5.8	5.9	17.29,5.9		17.25	5.8	5.9	17.25,5.9		17.9167	5.1	5.2	17.92,5.2		17.5	5.6	5.6	17.5,5.6		18.125	4.9	5	18.125,5		17.5	5.6	5.7	17.5,5.7		18.75	4.3	4.4	18.75,4.4
17.1	6.2	6.2	17.1,6.2		17.125	6.1	6.2	17.13,6.2		17.1667	6.1	6.2	17.17,6.2		17.2917	6	6	17.29,6		17.25	6	6	17.25,6		17.9167	5.4	5.5	17.92,5.5		17.5	5.8	5.9	17.5,5.9		18.125	5.1	5.1	18.125,5.1		17.5	5.8	5.9	17.5,5.9		18.75	4.5	4.6	18.75,4.6
17.1	7.5	7.6	17.1,7.6		17.125	7.4	7.5	17.13,7.5		17.1667	7.4	7.4	17.17,7.4		17.2917	7.3	7.4	17.29,7.4		17.25	7.3	7.4	17.25,7.4		17.9167	6.6	6.6	17.92,6.6		17.5	7.1	7.2	17.5,7.2		18.125	6.4	6.5	18.125,6.5		17.5	7.1	7.2	17.5,7.2		18.75	5.8	5.8	18.75,5.8
17.1	9.5	9.5	17.1,9.5		17.125	9.5	9.6	17.13,9.6		17.1667	9.4	9.5	17.17,9.5		17.2917	9.3	9.3	17.29,9.3		17.25	9.3	9.4	17.25,9.4		17.9167	8.7	8.7	17.92,8.7		17.5	9.1	9.1	17.5,9.1		18.125	8.5	8.6	18.125,8.6		17.5	9.1	9.2	17.5,9.2		18.75	7.8	7.9	18.75,7.9
17.5	5.5	5.6	17.5,5.6		17.625	5.4	5.5	17.63,5.5		17.5	5.5	5.6	17.5,5.6		17.7083	5.3	5.4	17.71,5.4		17.75	5.3	5.4	17.75,5.4		17.9167	5.1	5.2	17.92,5.2		17.5	5.5	5.6	17.5,5.6		18.125	4.9	5	18.125,5		17.5	5.5	5.5	17.5,5.5		18.75	4.3	4.4	18.75,4.4
17.5	6.3	6.4	17.5,6.4		17.625	6.2	6.3	17.63,6.3		17.5	6.3	6.3	17.5,6.3		17.7083	6.1	6.2	17.71,6.2		17.75	6	6	17.75,6		17.9167	5.9	6	17.92,6		17.5	6.3	6.4	17.5,6.4		18.125	5.7	5.8	18.125,5.8		17.5	6.3	6.4	17.5,6.4		18.75	5	5.1	18.75,5.1
17.5	9.3	9.4	17.5,9.4		17.625	9.2	9.3	17.63,9.3		17.5	9.3	9.4	17.5,9.4		17.7083	9.1	9.2	17.71,9.2		17.75	9.1	9.1	17.75,9.1		17.9167	8.9	9	17.92,9		17.5	9.3	9.5	17.5,9.5		18.125	8.7	8.8	18.125,8.8		17.5	9.3	9.4	17.5,9.4		18.75	8.1	8.2	18.75,8.2
17.5	9.6	9.7	17.5,9.7		17.625	9.4	9.4	17.63,9.4		17.5	9.6	9.7	17.5,9.7		17.7083	9.4	9.5	17.71,9.5		17.75	9.3	9.4	17.75,9.4		17.9167	9.1	9.2	17.92,9.2		17.5	9.6	9.6	17.5,9.6		18.125	8.9	8.9	18.125,8.9		17.5	9.6	9.7	17.5,9.7		18.75	8.3	8.4	18.75,8.4
17.7	3.3	3.3	17.7,3.3		17.875	3.2	3.3	17.88,3.3		17.8333	3.2	3.2	17.83,3.2		17.7083	3.3	3.3	17.71,3.3		17.75	3.3	3.4	17.75,3.4		17.9167	3.1	3.2	17.92,3.2		18.5	2.5	2.6	18.5,2.6		18.125	2.9	3	18.125,3		19.1667	1.9	2	19.17,2		18.75	2.3	2.4	18.75,2.4
17.9	5.4	5.5	17.9,5.5		18.125	5.2	5.2	18.13,5.2		18.1667	5.2	5.3	18.17,5.3		18.125	5.2	5.3	18.13,5.3		18.25	5.1	5.2	18.25,5.2		17.9167	5.4	5.5	17.92,5.5		18.5	4.8	4.8	18.5,4.8		18.125	5.2	5.3	18.125,5.3		19.1667	4.2	4.4	19.17,4.4		18.75	4.6	4.6	18.75,4.6
17.9	6.3	6.4	17.9,6.4		18.125	6.1	6.2	18.13,6.2		18.1667	6	6	18.17,6		18.125	6.1	6.2	18.13,6.2		18.25	5.9	6	18.25,6		17.9167	6.3	6.3	17.92,6.3		18.5	5.7	5.8	18.5,5.8		18.125	6.1	6.1	18.125,6.1		19.1667	5	5	19.17,5		18.75	5.4	5.5	18.75,5.5
18.1	7.2	7.2	18.1,7.2		18.125	7.1	7.2	18.13,7.2		18.1667	7.1	7.1	18.17,7.1		18.125	7.1	7.2	18.13,7.2		18.25	7	7.1	18.25,7.1		18.75	6.5	6.6	18.75,6.6		18.5	6.8	6.9	18.5,6.9		18.125	7.1	7.1	18.125,7.1		19.1667	6.1	6.2	19.17,6.2		18.75	6.5	6.5	18.75,6.5
18.3	5.9	6	18.3,6		18.375	5.9	6	18.38,6		18.5	5.7	5.7	18.5,5.7		18.5417	5.7	5.7	18.54,5.7		18.75	5.5	5.6	18.75,5.6		18.75	5.5	5.5	18.75,5.5		18.5	5.7	5.8	18.5,5.8		19.375	4.9	5	19.375,5		19.1667	5.1	5.2	19.17,5.2		18.75	5.5	5.6	18.75,5.6
18.3	8.3	8.4	18.3,8.4		18.375	8.2	8.3	18.38,8.3		18.5	8.1	8.1	18.5,8.1		18.5417	8	8.1	18.54,8.1		18.75	7.8	7.9	18.75,7.9		18.75	7.8	7.9	18.75,7.9		18.5	8.1	8.2	18.5,8.2		19.375	7.2	7.3	19.375,7.3		19.1667	7.4	7.5	19.17,7.5		18.75	7.8	7.9	18.75,7.9
18.5	3.3	3.3	18.5,3.3		18.625	3.2	3.3	18.63,3.3		18.5	3.3	3.4	18.5,3.4		18.5417	3.3	3.3	18.54,3.3		18.75	3.1	3.2	18.75,3.2		18.75	3.1	3.2	18.75,3.2		18.5	3.3	3.4	18.5,3.4		19.375	2.4	2.5	19.375,2.5		19.1667	2.6	2.7	19.17,2.7		18.75	3.1	3.3	18.75,3.3
18.5	6.3	6.4	18.5,6.4		18.625	6.2	6.3	18.63,6.3		18.5	6.3	6.3	18.5,6.3		18.5417	6.2	6.3	18.54,6.3		18.75	6	6	18.75,6		18.75	6	6	18.75,6		18.5	6.3	6.4	18.5,6.4		19.375	5.4	5.5	19.375,5.5		19.1667	5.6	5.7	19.17,5.7		18.75	6	6.2	18.75,6.2
18.9	5.9	6	18.9,6		19.125	5.7	5.8	19.13,5.8		19.1667	5.6	5.6	19.17,5.6		18.9583	5.8	5.9	18.96,5.9		19.25	5.5	5.6	19.25,5.6		19.5833	5.2	5.2	19.58,5.2		19.5	5.3	5.5	19.5,5.5		19.375	5.4	5.5	19.375,5.5		19.1667	5.6	5.7	19.17,5.7		21.25	3.5	3.6	21.25,3.6
18.9	7.9	8	18.9,8		19.125	7.7	7.7	19.13,7.7		19.1667	7.6	7.7	19.17,7.7		18.9583	7.8	7.8	18.96,7.8		19.25	7.6	7.7	19.25,7.7		19.5833	7.2	7.3	19.58,7.3		19.5	7.3	7.4	19.5,7.4		19.375	7.4	7.4	19.375,7.4		19.1667	7.6	7.7	19.17,7.7		21.25	5.6	5.6	21.25,5.6
19.3	4.4	4.4	19.3,4.4		19.375	4.3	4.3	19.38,4.3		19.5	4.2	4.2	19.5,4.2		19.375	4.3	4.4	19.38,4.4		19.75	3.9	4	19.75,4		19.5833	4.1	4.1	19.58,4.1		19.5	4.2	4.3	19.5,4.3		19.375	4.3	4.3	19.375,4.3		20.8333	2.9	3	20.83,3		21.25	2.4	2.6	21.25,2.6
19.3	6.5	6.6	19.3,6.6		19.375	6.4	6.4	19.38,6.4		19.5	6.3	6.3	19.5,6.3		19.375	6.4	6.5	19.38,6.5		19.75	6.1	6.2	19.75,6.2		19.5833	6.2	6.3	19.58,6.3		19.5	6.3	6.4	19.5,6.4		19.375	6.4	6.5	19.375,6.5		20.8333	5	5	20.83,5		21.25	4.6	4.6	21.25,4.6
19.3	7	7.1	19.3,7.1		19.375	6.9	6.9	19.38,6.9		19.5	6.8	6.9	19.5,6.9		19.375	6.9	6.9	19.38,6.9		19.75	6.6	6.6	19.75,6.6		19.5833	6.7	6.8	19.58,6.8		19.5	6.8	6.9	19.5,6.9		19.375	6.9	6.9	19.375,6.9		20.8333	5.5	5.5	20.83,5.5		21.25	5.1	5.1	21.25,5.1
19.3	7.7	7.7	19.3,7.7		19.375	7.6	7.7	19.38,7.7		19.5	7.5	7.6	19.5,7.6		19.375	7.6	7.7	19.38,7.7		19.75	7.2	7.3	19.75,7.3		19.5833	7.4	7.4	19.58,7.4		19.5	7.5	7.5	19.5,7.5		19.375	7.6	7.6	19.375,7.6		20.8333	6.1	6.2	20.83,6.2		21.25	5.7	5.8	21.25,5.8
19.3	8.6	8.6	19.3,8.6		19.375	8.5	8.5	19.38,8.5		19.5	8.4	8.4	19.5,8.4		19.375	8.5	8.6	19.38,8.6		19.75	8.1	8.2	19.75,8.2		19.5833	8.3	8.4	19.58,8.4		19.5	8.4	8.5	19.5,8.5		19.375	8.5	8.6	19.375,8.6		20.8333	7	7	20.83,7		21.25	6.6	6.7	21.25,6.7
19.5	9.1	9.1	19.5,9.1		19.625	9	9	19.63,9		19.5	9.1	9.1	19.5,9.1		19.7917	8.8	8.9	19.79,8.9		19.75	8.9	8.9	19.75,8.9		19.5833	9	9	19.58,9		19.5	9.1	9.1	19.5,9.1		20.625	8	8.1	20.625,8.1		20.8333	7.8	7.9	20.83,7.9		21.25	7.4	7.5	21.25,7.5
19.9	5	5.1	19.9,5.1		20.125	4.8	4.8	20.13,4.8		20.1667	4.8	4.9	20.17,4.9		20.2083	4.7	4.8	20.21,4.8		20.25	4.7	4.8	20.25,4.8		20.4167	4.5	4.6	20.42,4.6		20.5	4.4	4.5	20.5,4.5		20.625	4.3	4.3	20.625,4.3		20.8333	4.1	4.2	20.83,4.2		21.25	3.7	3.8	21.25,3.8
19.9	5.4	5.5	19.9,5.5		20.125	5.2	5.2	20.13,5.2		20.1667	5.1	5.2	20.17,5.2		20.2083	5.1	5.1	20.21,5.1		20.25	5.1	5.2	20.25,5.2		20.4167	4.9	4.9	20.42,4.9		20.5	4.8	4.8	20.5,4.8		20.625	4.7	4.8	20.625,4.8		20.8333	4.5	4.5	20.83,4.5		21.25	4.1	4.1	21.25,4.1
19.9	5.7	5.7	19.9,5.7		20.125	5.5	5.5	20.13,5.5		20.1667	5.4	5.5	20.17,5.5		20.2083	5.4	5.4	20.21,5.4		20.25	5.3	5.4	20.25,5.4		20.4167	5.2	5.2	20.42,5.2		20.5	5.1	5.1	20.5,5.1		20.625	5	5.1	20.625,5.1		20.8333	4.7	4.9	20.83,4.9		21.25	4.3	4.4	21.25,4.4
19.9	6.2	6.2	19.9,6.2		20.125	6	6	20.13,6		20.1667	6	6	20.17,6		20.2083	5.9	6	20.21,6		20.25	5.9	6	20.25,6		20.4167	5.7	5.9	20.42,5.9		20.5	5.6	5.6	20.5,5.6		20.625	5.5	5.6	20.625,5.6		20.8333	5.3	5.4	20.83,5.4		21.25	4.9	5	21.25,5
19.9	7.2	7.2	19.9,7.2		20.125	7	7.1	20.13,7.1		20.1667	7	7	20.17,7		20.2083	6.9	6.9	20.21,6.9		20.25	6.9	6.9	20.25,6.9		20.4167	6.7	6.8	20.42,6.8		20.5	6.6	6.7	20.5,6.7		20.625	6.5	6.6	20.625,6.6		20.8333	6.3	6.4	20.83,6.4		21.25	5.9	6	21.25,6
20.1	3.3	3.3	20.1,3.3		20.125	3.3	3.4	20.13,3.4		20.1667	3.3	3.4	20.17,3.4		20.2083	3.2	3.3	20.21,3.3		20.25	3.2	3.2	20.25,3.2		20.4167	3	3	20.42,3		20.5	2.9	3	20.5,3		20.625	2.8	2.8	20.625,2.8		20.8333	2.6	2.7	20.83,2.7		21.25	2.2	2.2	21.25,2.2
20.1	5.6	5.7	20.1,5.7		20.125	5.6	5.6	20.13,5.6		20.1667	5.5	5.6	20.17,5.6		20.2083	5.5	5.6	20.21,5.6		20.25	5.4	5.6	20.25,5.6		20.4167	5.3	5.4	20.42,5.4		20.5	5.2	5.3	20.5,5.3		20.625	5.1	5.1	20.625,5.1		20.8333	4.9	5	20.83,5		21.25	4.4	4.4	21.25,4.4
20.9	5.2	5.2	20.9,5.2		21.125	4.9	5	21.13,5		21.1667	4.9	4.9	21.17,4.9		21.0417	5	5.1	21.04,5.1		21.25	4.8	4.9	21.25,4.9		21.25	4.8	4.9	21.25,4.9		21.5	4.6	4.6	21.5,4.6		21.875	4.2	4.3	21.875,4.3		22.5	3.6	3.7	22.5,3.7		21.25	4.8	5	21.25,5
21.7	3.5	3.6	21.7,3.6		21.875	3.3	3.4	21.88,3.4		21.8333	3.4	3.5	21.83,3.5		21.875	3.3	3.3	21.88,3.3		21.75	3.5	3.5	21.75,3.5		22.0833	3.1	3.2	22.08,3.2		22.5	2.7	2.7	22.5,2.7		21.875	3.3	3.3	21.875,3.3		22.5	2.7	2.8	22.5,2.8		23.75	1.5	1.5	23.75,1.5
22.3	9	9	22.3,9		22.375	8.9	8.9	22.38,8.9		22.5	8.8	8.8	22.5,8.8		22.7083	8.6	8.7	22.71,8.7		22.75	8.5	8.6	22.75,8.6		22.9167	8.3	8.4	22.92,8.4		22.5	8.8	8.8	22.5,8.8		23.125	8.1	8.1	23.125,8.1		22.5	8.8	8.9	22.5,8.9		23.75	7.5	7.5	23.75,7.5
22.5	5.4	5.5	22.5,5.5		22.625	5.2	5.2	22.63,5.2		22.5	5.4	5.5	22.5,5.5		22.7083	5.2	5.3	22.71,5.3		22.75	5.1	5.2	22.75,5.2		22.9167	4.9	4.9	22.92,4.9		22.5	5.4	5.5	22.5,5.5		23.125	4.7	4.8	23.125,4.8		22.5	5.4	5.5	22.5,5.5		23.75	4.1	4.1	23.75,4.1
22.5	5.8	5.8	22.5,5.8		22.625	5.6	5.6	22.63,5.6		22.5	5.8	5.9	22.5,5.9		22.7083	5.6	5.7	22.71,5.7		22.75	5.5	5.6	22.75,5.6		22.9167	5.3	5.4	22.92,5.4		22.5	5.8	5.9	22.5,5.9		23.125	5.1	5.1	23.125,5.1		22.5	5.8	5.9	22.5,5.9		23.75	4.5	4.6	23.75,4.6
22.7	8.1	8.1	22.7,8.1		22.875	7.9	8	22.88,8		22.8333	7.9	8	22.83,8		22.7083	8.1	8.1	22.71,8.1		22.75	8	8	22.75,8		22.9167	7.9	7.9	22.92,7.9		23.5	7.3	7.4	23.5,7.4		23.125	7.6	7.6	23.125,7.6		24.1667	6.6	6.7	24.17,6.7		23.75	7	7	23.75,7
23.3	6.5	6.6	23.3,6.6		23.375	6.4	6.4	23.38,6.4		23.5	6.3	6.3	23.5,6.3		23.5417	6.2	6.3	23.54,6.3		23.75	6	6	23.75,6		23.75	6	6	23.75,6		23.5	6.3	6.4	23.5,6.4		24.375	5.4	5.5	24.375,5.5		24.1667	5.6	5.7	24.17,5.7		23.75	6	6.2	23.75,6.2
23.3	8.5	8.5	23.3,8.5		23.375	8.5	8.5	23.38,8.5		23.5	8.3	8.4	23.5,8.4		23.5417	8.3	8.4	23.54,8.4		23.75	8.1	8.2	23.75,8.2		23.75	8.1	8.2	23.75,8.2		23.5	8.3	8.3	23.5,8.3		24.375	7.5	7.6	24.375,7.6		24.1667	7.7	7.9	24.17,7.9		23.75	8.1	8.2	23.75,8.2
23.7	6.4	6.5	23.7,6.5		23.875	6.2	6.3	23.88,6.3		23.8333	6.3	6.3	23.83,6.3		23.9583	6.1	6.2	23.96,6.2		23.75	6.4	6.5	23.75,6.5		23.75	6.4	6.5	23.75,6.5		24.5	5.6	5.6	24.5,5.6		24.375	5.7	5.8	24.375,5.8		24.1667	5.9	6	24.17,6		23.75	6.4	6.5	23.75,6.5
24.9	3.9	3.9	24.9,3.9		25.125	3.7	3.8	25.13,3.8		25.1667	3.7	3.8	25.17,3.8		25.2083	3.6	3.6	25.21,3.6		25.25	3.6	3.7	25.25,3.7		25.4167	3.4	3.5	25.42,3.5		25.5	3.3	3.4	25.5,3.4		25.625	3.2	3.3	25.625,3.3		25.8333	3	3	25.83,3		26.25	2.6	2.7	26.25,2.7
24.9	5.1	5.2	24.9,5.2		25.125	4.8	4.8	25.13,4.8		25.1667	4.8	4.9	25.17,4.9		25.2083	4.8	4.8	25.21,4.8		25.25	4.7	4.8	25.25,4.8		25.4167	4.6	4.7	25.42,4.7		25.5	4.5	4.6	25.5,4.6		25.625	4.3	4.3	25.625,4.3		25.8333	4.1	4.2	25.83,4.2		26.25	3.7	3.8	26.25,3.8
24.9	6.3	6.4	24.9,6.4		25.125	6	6	25.13,6		25.1667	6	6	25.17,6		25.2083	5.9	6	25.21,6		25.25	5.9	6	25.25,6		25.4167	5.7	5.9	25.42,5.9		25.5	5.7	5.8	25.5,5.8		25.625	5.5	5.6	25.625,5.6		25.8333	5.3	5.4	25.83,5.4		26.25	4.9	5	26.25,5
24.9	7.2	7.2	24.9,7.2		25.125	7	7.1	25.13,7.1		25.1667	6.9	7	25.17,7		25.2083	6.9	6.9	25.21,6.9		25.25	6.8	6.9	25.25,6.9		25.4167	6.7	6.8	25.42,6.8		25.5	6.6	6.7	25.5,6.7		25.625	6.5	6.6	25.625,6.6		25.8333	6.2	6.4	25.83,6.4		26.25	5.8	5.8	26.25,5.8
25.1	4	4.1	25.1,4.1		25.125	4	4.1	25.13,4.1		25.1667	4	4.1	25.17,4.1		25.2083	3.9	3.9	25.21,3.9		25.25	3.9	4	25.25,4		25.4167	3.7	3.8	25.42,3.8		25.5	3.6	3.7	25.5,3.7		25.625	3.5	3.6	25.625,3.6		25.8333	3.3	3.3	25.83,3.3		26.25	2.9	2.9	26.25,2.9
25.5	5.9	6	25.5,6		25.625	5.8	5.9	25.63,5.9		25.5	5.9	6	25.5,6		25.625	5.8	5.9	25.63,5.9		25.75	5.7	5.7	25.75,5.7		26.25	5.2	5.2	26.25,5.2		25.5	5.9	5.9	25.5,5.9		25.625	5.8	6	25.625,6		25.8333	5.6	5.7	25.83,5.7		26.25	5.2	5.3	26.25,5.3
25.9	3.2	3.3	25.9,3.3		26.125	3	3	26.13,3		26.1667	2.9	2.9	26.17,2.9		26.0417	3.1	3.2	26.04,3.2		26.25	2.9	2.9	26.25,2.9		26.25	2.9	3	26.25,3		26.5	2.6	2.7	26.5,2.7		26.875	2.2	2.3	26.875,2.3		27.5	1.6	1.7	27.5,1.7		26.25	2.9	2.9	26.25,2.9
26.3	6.1	6.2	26.3,6.2		26.375	6	6	26.38,6		26.5	5.9	6	26.5,6		26.4583	6	6	26.46,6		26.75	5.7	5.7	26.75,5.7		27.0833	5.3	5.4	27.08,5.4		26.5	5.9	5.9	26.5,5.9		26.875	5.5	5.6	26.875,5.6		27.5	4.9	5	27.5,5		28.75	3.7	3.8	28.75,3.8
26.5	8.2	8.3	26.5,8.3		26.625	8	8.1	26.63,8.1		26.5	8.2	8.3	26.5,8.3		26.875	7.8	7.8	26.88,7.8		26.75	7.9	8	26.75,8		27.0833	7.6	7.8	27.08,7.8		26.5	8.2	8.3	26.5,8.3		26.875	7.8	7.9	26.875,7.9		27.5	7.2	7.4	27.5,7.4		28.75	5.9	6	28.75,6
[truncated: 4 more columns]

## Sheet: Table S4
Table S4. Experimental profile of compounds in the oxidized products in aqueous obtained using the Rancimat method and the analysis using 1 injection, with the compound identification performed by auto integration using Mass Hunter.
Order	Name	Retention time (min)	Area	M match	R match	CAS-number
1	n-Hexane	6.51	2.71358e+09	852	860	110-54-3
2	2-Butanone	7.774	3.20305e+08	888	932	78-93-3
3	2-Pentanone	9.252	3.10343e+08	825	839	107-89-9
4	Butanal, 3-methyl-	9.342	3.18082e+08	763	766	590-86-3
5	Toluene	11.024	2.72974e+08	878	887	108-88-3
6	3-Hexanone	11.249	3.98166e+08	866	919	589-38-8
7	2-Hexanone	11.645	1.4975e+09	832	838	591-78-6
8	Octanal	11.799	8.21464e+08	715	719	124-13-0
9	5-Hexen-2-one	12.145	2.60927e+08	887	894	109-49-9
10	3-Penten-one, 4-methyl-	12.55	2.25194e+08	874	885	141-79-7
11	1-Hexene,3,4,5-trimethyl-	12.844	2.12455e+08	755	776	56728-10-0
12	4-Penten-2-one, 3-methyl-	13.202	6.96941e+07	819	942	758-87-2
13	But-3-en-1-yl propyl carbonate	13.281	1.26378e+08	720	761
14	Tetrahydrofurfuryl acrylate	13.472	5.92861e+08	726	773	2399-48-6
15	1-Hexanol, 4-methyl- ,(S)-	13.885	2.93173e+08	790	797	1767-46-0
16	4-methyl-5-nonanone	14.042	8.00118e+08	738	818	35900-26-6
17	Cyclopentanone, 2-methyl-	14.146	4.84228e+08	846	874	1120-72-5
18	3-Hexen-2-one	14.265	2.82858e+08	857	865	763-93-9
19	Cyclohexanol, 1-methyl-	14.435	2.09591e+09	753	757	590-67-0
20	(Z)-2-Heptene	14.567	5.01628e+08	743	756	6443-92-1
21	Heptanal	14.639	4.0708e+08	731	790	111-71-7
22	1,5-Dimethyl-6-oxa-bicyclo[3.1.0]	14.808	1.20755e+09	765	789	82461-31-2
23	alpla-Methylstyrene	15.001	7.63012e+08	828	842	98-83-9
24	Azetidine, 3-methyl-3-phenyl-	15.122	9.18117e+07	686	903	5961-33-1
25	1-Pentanol,2-ethyl-4-methyl-	15.267	1.48085e+08	678	751	106-67-2
26	1,5-Dimethyl-6-oxa-bicyclo[3.1.0]hexane	15.332	7.98913e+08	788	798	82461-31-2
27	1,5-Dimethyl-6-oxa-bicyclo[3.1.0]hexane	15.578	6.12745e+08	780	790	82461-31-2
28	3-Hexanol, 5-methyl-	15.778	52561835	808	878	623-55-2
29	Furan, 2-butyltetrahydro-	15.849	5.62465e+07	791	847	1004-29-1
30	3-Hexen-2-one, 5-methyl-	16.015	1.07635e+08	808	818	5166-53-0
31	Hexanenitrile	16.072	1.73507e+08	747	800	628-73-9
32	2-nonanol	16.211	1.83027e+08	760	792	628-99-9
33	3-Hexene,2,2-dimethyl-,(Z)-	16.287	4.3485e+07	815	887	690-92-6
34	4-Octanol	16.37	5.27399e+08	893	904	589-63-9
35	Cyclooctane	16.556	1.64852e+09	742	753	292-64-8
36	1-Hexene,3,4,5-trimethyl-	16.673	8.89039e+07	751	794	56728-10-0
37	3-Hepten-2-one,(Z)-	16.799	1.91536e+08	830	835	69668-88-8
38	Cyclopentanone,2-ethyl-	16.914	4.68011e+08	780	811	4971-18-0
39	3-Heptanone, 5-methyl-	16.92	1.97762e+08	752	753	541-85-5
40	3-Heptanone, 5-methyl-	16.935	4.65353e+08	795	800	541-85-5
41	3-Isoproylcyclopentene	17.126	5.80967e+07	755	777	4276-45-3
42	Heptane, 1-(2-butenenyloxy)-, (E)-	17.219	2.05373e+08	711	773	56052-77-8
43	Ethanone, 1-cyclohexyl-	17.288	1.00393e+09	780	781	823-76-7
44	Cyclohexanone, 4-hydroxy-4-methyl-	17.37	1.83044e+09	768	784	17429-02-6
45	7-Octen-2-one	17.411	1.04816e+08	710	737	3664-60-6
46	Cyclopentane ,propyl-	17.436	1.08712e+09	825	843	2040-96-2
47	Cyclohexanol, 2,4-dimethyl-	17.625	5.04412e+08	816	833	69542-91-2
48	3-t-Butyl-oct-6-en-ol	17.692	1.50374e+08	742	746
49	7-Oxabicyclo[4.1.0]heptane,1-methyl-	17.847	1.32564e+09	762	819	1713-33-3
50	7-oxabicyclo[4.1.0]heptane,1,5-dimethyl-	17.937	1.69304e+09	812	813	162239-52-3
51	7-oxabicyclo[4.1.0]heptane,1,5-dimethyl-	18.093	6.94671e+08	784	786	162239-52-4
52	Ethanone,1-cyclohexyl-	18.187	4.54597e+08	828	878	823-76-7
53	6-octen-2-one, (Z)-	18.406	4.14512e+08	861	864	74810-53-0
54	4-Methyl-dodec-33-en-1-ol	18.53	5.00369e+07	717	726	156992-84-6
55	2-Methyl-oct-2-enedial	18.666	6.84985e+07	757	768	38061-92-6
56	undecanal	18.771	5.88013e+07	762	767	112-44-7
57	Oxirane, tetradecyl-	18.859	4.27827e+07	753	766	7320-37-8
58	n-Heptadecanol-1	18.992	1.54516e+08	752	752	1454-85-9
59	Cyclohexane, 1,2,4-trimethyl-	19.109	5.98551e+07	734	766	2234-75-5
60	1-Decanol,5,9-dimethyl-	19.185	2.40747e+08	749	762	91482-38-1
61	1-nonanol	19.242	4.12479e+08	799	808	143-08-8
62	Oxirane, hexyl-	19.248	7.49083e+07	796	807	2984-50-1
63	Oxirane, hexyl-	19.256	5.55519e+08	734	762	2984-50-1
64	Cyclohexene, 3,5-dimethyl-	19.408	2.87927e+08	785	807	823-17-6
65	Oxirane, [(dodecyloxy)methyl]-	19.498	2.51152e+08	741	746	2461-18-9
66	2,3-Dimethyl-3-heptane,(z)-	19.708	2.62746e+08	769	782	59643-73-1
67	undecanal	19.817	1.30889e+09	708	711	112-44-7
68	Cyclohexanone,2-ethyl-	19.952	4.13672e+08	886	913	4423-94-3
69	Cyclobuta[1,2,3,4]dicyclooctene, hexadecahydro-	20.055	1.81324e+08	762	774	18208-94-1
70	2-Cyclopenten-1-one, 2,3-dimethyl-	20.107	1.42779e+08	799	852	1121-05-7
71	Cyclodecane	20.185	1.32381e+09	788	793	293-96-9
72	1,2-Epoxynonane	20.257	1.46475e+09	750	764	28114-20-7
73	2-Octenal, (E) -	20.363	4.38928e+08	827	842	2548-87-0
74	trans-3-Nonen-2-one	20.41	4.18153e+08	793	803	18402-83-0
75	2-Cyclohexen-1-one,4,5-dimethyl-	20.473	1.39074e+08	778	848	5715-25-3
76	Dodecanal	20.538	2.52647e+08	785	795	112-54-9
77	Nona-3,5-dien-2-ol	20.64	8.48683e+07	792	796
78	2,4-Pentadien-1-ol, 3-propyl-, (2Z) -	20.716	1.14443e+08	714	784
79	Nona-3,5-dien-2-ol	20.768	1.10515e+09	756	762
80	2-Methylbenzo(e) [1,3]oxathiane	21.05	1.05756e+09	607	664	224308-95-6
81	4-Ethynyl-6,8-dioxabicyclo[3.2.1]oct-2-en-4-ol	21.06	1.22302e+09	620	664
82	2,4-Pentadien-1-ol, 3-propyl-, (2Z) -	21.228	5.11926e+08	699	802
83	4-Chloro-3-n-butyltetraahydropyran	21.35	1.20042e+08	602	675	35952-06-8
84	Nona-3,5-dien-2-ol	21.462	6.45187e+08	745	756
85	3-Cyclohexene-1-carboxaldehyde, 1-methyl-	21.627	1.50018e+08	714	746	931-96-4
86	Oxirane, tetradecyl-	21.75	9.67448e+07	742	812	7320-37-8
87	Carbonic acid, methyl octyl ester	21.869	8.12205e+08	777	835
88	Octanoic acid, 7-oxo-	22.032	3.37178e+08	711	713	14112-98-2
89	Levomenthol	22.137	1.31514e+08	776	818	2216-51-5
90	Levomenthol	22.286	6.77568e+07	739	763	2216-51-5
91	Cyclononanone	22.523	3.42688e+08	757	760	3350-30-9
92	Mannosamine	22.662	2.42008e+08	647	648	6915-39-5
93	Benzamidine	22.767	1.1808e+09	664	682	618-39-3
94	(1R,3E,7E,11R)-1,5,5,8-Tetramethyl-12-oxabicyclo[9.1.0]dodeca-3,3-diene	22.944	4.67803e+07	636	703	19888-34-7
95	1,3-Dioxolane, 4-[[(2-methoxy-4-octadecenyl)oxy)methyl]-2,2-dimethyl-	23.039	7.77301e+08	684	705	16725-41-0
96	3-Heptanol,2,4-dimethyl-	23.082	2.1821e+08	689	707	19549-72-5
97	I-Gala-I-ido-octose	23.15	9.07653e+07	695	724
98	Ethanone,1-(1-cyclohexen-1-yl)-	23.262	1.38529e+08	744	767	932-66-1
99	10-Undecanal	23.329	1.40899e+08	755	761	112-45-8
100	2-Butanone,4-cyclohexyl-	23.509	3.85227e+08	704	803	2316-85-0
101	1-(1-Methoxypropan-2-yloxy)propan-2-yl acetate	23.632	3.58335e+08	626	738
102	Z,Z-2,5-Pentadecadien-1-ol	23.737	6.32854e+07	702	706	139185-79-8
103	1,6-Octadiene, 3-ethoxy-3,7-dimethyl-	23.838	7.70313e+07	687	700	72845-33-1
104	6-Nonenoic acid, methyl ester	23.838	1.49464e+08	797	846	20731-21-9
105	Acetophenone	24.08	6.41737e+08	739	798	98-86-2
106	Z,Z,Z-1,4,6,9-Nonadecatetraene	24.189	1.0784e+08	686	687
107	Benzenemethanol, alpha,alpha-dimethyl-	24.751	1.3213e+09	778	795	617-94-7
108	12-15,16-Diepoxyhexadecane	25.255	4.74978e+07	701	701
109	2-undecanone	25.685	1.41482e+08	752	875	112-12-9
110	4-tert-Butylcyclohexyl acetate	25.763	1.93485e+08	800	829	32210-23-4
111	1,6-Octadiene,3-ethoxy-3,7-dimethyl-	25.853	1.26552e+08	681	698	72845-33-1
112	E-2-Hexenyl benzoate	26.02	1.12542e+08	701	707	76841-70-8
113	4-Acetonylcycloheptanone	26.126	8.37387e+07	716	731	86428-60-6
114	1-Hexadecanol, 2-methyl-	26.29	6.15563e+07	738	738	2490-48-4
115	4-Trifluroacetoxytridecane	26.325	7.95303e+07	799	839
116	8-Dodecenoic acid, 11-hydroxy-, methyl ester, [s-(E) ]-	26.325	4.15425e+07	728	731	59752-89-5
117	Ethanone, 1-(3-methylphenyl)-	26.578	4.24741e+07	731	799	585-74-0
118	2H-Pyran-2-one, tetrahydro-4-hydroxy-6-pentyl-	26.655	7.77771e+07	664	707	36555-25-6
119	Naphthalene	26.802	9.24754e+07	700	836	91-20-3
120	3-Chloropropane-1,2-diol, bis(tert-butyldimethylsily)ether	27.856	1.32161e+08	649	727
121	Geranyl vinyl ether	27.934	6.23092e+07	707	719
122	2-dodecanone	28.264	4.22722e+07	757	871	6172-49-1
123	Oxirane, [(hexadecyloxy)methyl]-	28.75	9.20272e+07	719	769	15956-99-8
124	3-Trifluroacetoxypentadecane	28.829	6.87467e+07	763	796
125	3-Trifluroacetoxydodecane	28.922	5.17667e+07	732	757
126	N-carbobenzyloxy-l-tyrosyl-l-valine	30.101	1.87034e+08	727	788
127	Octaethylene glycol monododecyl ether	31.331	4.41699e+07	740	741	3055-98-9
128	Pterin-6-carboxylic acid	32.012	4.45736e+07	654	666	948-60-7
129	Octaethylene glycol monododecyl ether	34.332	7.44534e+07	700	702	3055-98-9
130	Eicosane	34.712	3.88997e+09	877	891	112-95-8

## Sheet: Table S5
Table S5. Data of parameters related to peak capacity approximation for the CH/C analysis of the oxidized products in aqueous sample (obtained using the Rancimat method) using different H/C window. The data not passing the criteria are shown in red italic.
	H/C window	Beta	Approximated saturation of the separation space	Reduced 1SD	Reduced 2SD	Reduced SD Ratio	1nc/beta	2nc	Peak capacity Ratio	Total nc	# identified peaks		Analysis time (min)	Production rate (identified peak/min)
	0.2	1.24898	1	0.00105988	0.00644699	6.08274	190	40	0.210526	7600	235		918	0.255991
	0.25	1.36928	1.0307	0.00105988	0.00665005	6.27433	174	39	0.224138	6786	228		734.4	0.310458
	0.333333	1.59857	1.05381	0.00105988	0.00710692	6.70539	149	37	0.248322	5513	223		550.8	0.404866
	0.416667	1.85212	1.06818	0.00105988	0.00761456	7.18434	129	34	0.263566	4386	220		440.64	0.499274
	0.5	2.12125	1.08295	0.00105988	0.00783115	7.38869	113	33	0.292035	3729	217		367.2	0.590959
	0.833333	3.27435	1.16337	0.00105988	0.00803552	7.58152	74	33	0.445946	2442	202		220.32	0.916848
	1	3.87282	1.19289	0.00105988	0.0081377	7.67793	62	32	0.516129	1984	197		183.6	1.07298
	1.25	4.78258	1.29121	0.00105988	0.00839781	7.92334	51	31	0.607843	1581	182		146.88	1.23911
	1.66667	6.31549	1.36628	0.00105988	0.0084938	8.01391	39	31	0.794872	1209	172		110.16	1.56137
	2.5	9.40703	1.56667	0.00105988	0.00868579	8.19505	27	30	1.11111	810	150		73.44	2.04248
	5	18.7342	1.80769	0.00105988	0.00879735	8.30031	14	30	2.14286	420	130		36.72	3.54031
	Suggested criteria for the capacity calculation		<=1.5			1<= and <=8			0.125<= and <=8		50-1000		1DGC	0.741379
	Anal. Chem. 2008, 80, 461-473
	<beta> is rather constant
	1. Constituents (50-1000)
	2. a large range in the aspect ratio of the 2D separations 8-fold range in the ratio of the peak capacities of the first and second dimensions.
	3. Reduced SD ratio of <=8 and >=1
	4. saturation of the separation space (alpha<=1.5)
