# Supplementary material for: Cryogen-free comprehensive heartcut multidimensional gas chromatography using a Deans switch for improved analysis of petrochemical products derived from palmitic acid oxidation
Source: Royal Society of Chemistry journal article supplement (doi:10.1039/d0ay01527j), 2020-01-01
Supplement: d0ay01527j3.pdf [file d0ay01527j3.pdf]

## Supporting Information

# Cryogenic Free Comprehensive Multidimensional Gas Chromatography Using a Deans Switch for Improved Analysis of Petrochemical Products Derived from Palmitic Acid Oxidation

Nilobon Thongdorn-Ae<sup>1</sup>, Thumnoon Nhujak<sup>2</sup>, Pannipa Janta<sup>2</sup>, Atitarn Rueangthawee<sup>1</sup>,  
Napida Hinchiranan<sup>3,4,5\*</sup> and Chadin Kulsing<sup>2,\*</sup>

<sup>1</sup> Program in Petrochemistry and Polymer Science, Faculty of Science, Chulalongkorn University, Bangkok 10330, Thailand.

<sup>2</sup> Chromatographic Separation and Flavor Chemistry Research Unit and Center of Molecular Sensory Science, Department of Chemistry, Faculty of Science, Chulalongkorn University, Bangkok 10330, Thailand.

<sup>3</sup> Department of Chemical Technology, Faculty of Science, Chulalongkorn University, Bangkok 10330, Thailand

<sup>4</sup> Center of Excellence on Petrochemical and Materials Technology (PETROMAT), Chulalongkorn University, Bangkok 10330, Thailand

<sup>5</sup> Center of Excellence in Catalysis for Bioenergy and Renewable Chemicals (CBRC), Chulalongkorn University, Bangkok 10330, Thailand

## *Analytical Methods*

\*Authors for Correspondence:

Napida Hinchiranan

Tel: +6622187518

Email: napida.h@chula.ac.th

Chadin Kulsing

Tel: +66802971178

Email: chadin.k@chula.ac.th

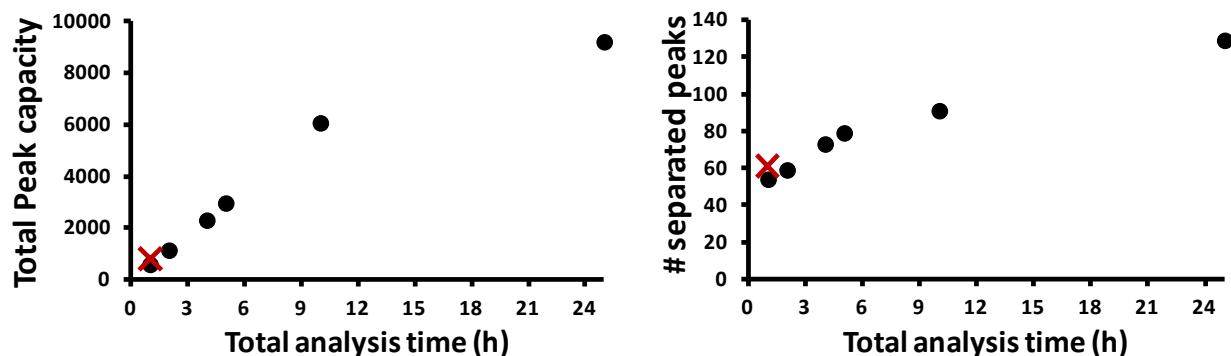

**Figure S1.** Plots of total peak capacity (left) and number of separated peaks (right) vs total CH/C analysis time obtained from the CH/C analysis of a petrochemical sample (●), compared with the data point obtained from GC×GC analysis using a flow modulator (×) for the same sample.

**Table S1.** The H/C events for each injection (run) of the comprehensive H/C analysis with the H/C window of 0.2 min.

| Run | Heart-cut range (min) |           |           |           |           |           |
|-----|-----------------------|-----------|-----------|-----------|-----------|-----------|
| 1   | 3.0-3.2               | 8.0-8.2   | 13.0-13.2 | 18.0-18.2 | 23.0-23.2 | 28.0-28.2 |
| 2   | 3.2-3.4               | 8.2-8.4   | 13.2-13.4 | 18.2-18.4 | 23.2-23.4 | 28.2-28.4 |
| 3   | 3.4-3.6               | 8.4-8.6   | 13.4-13.6 | 18.4-18.6 | 23.4-23.6 | 28.4-28.6 |
| 4   | 3.6-3.8               | 8.6-8.8   | 13.6-13.8 | 18.6-18.8 | 23.6-23.8 | 28.6-28.8 |
| 5   | 3.8-4.0               | 8.8-9.0   | 13.8-14.0 | 18.8-19.0 | 23.8-24.0 | 28.8-29.0 |
| 6   | 4.0-4.2               | 9.0-9.2   | 14.0-14.2 | 19.0-19.2 | 24.0-24.2 | 29.0-29.2 |
| 7   | 4.2-4.4               | 9.2-9.4   | 14.2-14.4 | 19.2-19.4 | 24.2-24.4 | 29.2-29.4 |
| 8   | 4.4-4.6               | 9.4-9.6   | 14.4-14.6 | 19.4-19.6 | 24.4-24.6 | 29.4-29.6 |
| 9   | 4.6-4.8               | 9.6-9.8   | 14.6-14.8 | 19.6-19.8 | 24.6-24.8 | 29.6-29.8 |
| 10  | 4.8-5.0               | 9.8-10.0  | 14.8-15.0 | 19.8-20.0 | 24.8-25.0 | 29.8-30.0 |
| 11  | 5.0-5.2               | 10.0-10.2 | 15.0-15.2 | 20.0-20.2 | 25.0-25.2 | 30.0-30.2 |
| 12  | 5.2-5.4               | 10.2-10.4 | 15.2-15.4 | 20.2-20.4 | 25.2-25.4 | 30.2-30.4 |
| 13  | 5.4-5.6               | 10.4-10.6 | 15.4-15.6 | 20.4-20.6 | 25.4-25.6 | 30.4-30.6 |
| 14  | 5.6-5.8               | 10.6-10.8 | 15.6-15.8 | 20.6-20.8 | 25.6-25.8 | 30.6-30.8 |
| 15  | 5.8-6.0               | 10.8-11.0 | 15.8-16.0 | 20.8-21.0 | 25.8-26.0 | 30.8-31.0 |
| 16  | 6.0-6.2               | 11.0-11.2 | 16.0-16.2 | 21.0-21.2 | 26.0-26.2 | 31.0-31.2 |
| 17  | 6.2-6.4               | 11.2-11.4 | 16.2-16.4 | 21.2-21.4 | 26.2-26.4 | 31.2-31.4 |
| 18  | 6.4-6.6               | 11.4-11.6 | 16.4-16.6 | 21.4-21.6 | 26.4-26.6 | 31.4-31.6 |
| 19  | 6.6-6.8               | 11.6-11.8 | 16.6-16.8 | 21.6-21.8 | 26.6-26.8 | 31.6-31.8 |
| 20  | 6.8-7.0               | 11.8-12.0 | 16.8-17.0 | 21.8-22.0 | 26.8-27.0 | 31.8-32.0 |
| 21  | 7.0-7.2               | 12.0-12.2 | 17.0-17.2 | 22.0-22.2 | 27.0-27.2 | 32.0-32.2 |
| 22  | 7.2-7.4               | 12.2-12.4 | 17.2-17.4 | 22.2-22.4 | 27.2-27.4 | 32.2-32.4 |
| 23  | 7.4-7.6               | 12.4-12.6 | 17.4-17.6 | 22.4-22.6 | 27.4-27.6 | 32.4-32.6 |
| 24  | 7.6-7.8               | 12.6-12.8 | 17.6-17.8 | 22.6-22.8 | 27.6-27.8 | 32.6-32.8 |
| 25  | 7.8-8.0               | 12.8-13.0 | 17.8-18.0 | 22.8-23.0 | 27.8-28.0 | 32.8-33.0 |

**Table S2.** Volatile compound profile of the ODH product in water obtained using the Rancimat method analyzed by using SPME 1DGC–MS.

| No. | Name                                | $t_R$<br>(min) | Retention index |            |            | Match score |            | Area<br>( $\times 10^7$ ) |
|-----|-------------------------------------|----------------|-----------------|------------|------------|-------------|------------|---------------------------|
|     |                                     |                | Experiment      | Literature | Difference | Match       | R<br>Match |                           |
| 1   | 2-Pentanone                         | 2.61           | 680             | 685        | 5          | 753         | 878        | 0.596                     |
| 2   | 3-Penten-2-one                      | 3.25           | 733             | 734        | 1          | 840         | 856        | 0.072                     |
| 3   | Toluene                             | 3.68           | 761             | 763        | 2          | 914         | 928        | 0.645                     |
| 4   | 2-Hexanone                          | 4.05           | 785             | 790        | 5          | 875         | 899        | 1.725                     |
| 5   | 4-Methyl-3-penten-2-one             | 4.25           | 798             | 798        | 0          | 685         | 703        | 0.169                     |
| 6   | 3-Hexen-2-one                       | 5.14           | 835             | 845        | 10         | 712         | 744        | 0.320                     |
| 7   | (R)-(+)-3-Methylcyclopentanone      | 5.29           | 841             | 848        | 7          | 827         | 876        | 0.168                     |
| 8   | (E)-2-Hexenal                       | 5.48           | 849             | 854        | 5          | 680         | 816        | 0.004                     |
| 9   | 5-Methyl-2-hexanone                 | 5.58           | 853             | 862        | 9          | 659         | 759        | 0.004                     |
| 10  | Ethylbenzene                        | 5.67           | 857             | 855        | -2         | 798         | 950        | 0.003                     |
| 11  | 5-Hepten-2-one                      | 6.04           | 872             | 866        | -6         | 819         | 853        | 0.318                     |
| 12  | 3-Heptanone                         | 6.33           | 884             | 887        | 3          | 755         | 756        | 0.220                     |
| 13  | 2-Heptanone                         | 6.44           | 888             | 891        | 3          | 878         | 878        | 1.364                     |
| 14  | Cyclohexanone                       | 6.47           | 889             | 894        | 5          | 715         | 749        | 0.339                     |
| 15  | 2-Methyl-2-hexenal                  | 6.54           | 892             | 884        | -8         | 655         | 679        | 0.113                     |
| 16  | Heptanal                            | 6.74           | 900             | 901        | 1          | 764         | 799        | 0.043                     |
| 17  | 2-Methyl-2-cyclopenten-1-one        | 6.88           | 905             | 913        | 8          | 793         | 836        | 0.049                     |
| 18  | 1-Cyclopentyl-ethanone              | 7.59           | 927             | 941        | 14         | 784         | 806        | 0.274                     |
| 19  | Cyclooctane                         | 7.84           | 935             | 927        | -8         | 700         | 752        | 0.178                     |
| 20  | 2-Methyl-cyclohexanone              | 8.11           | 943             | 953        | 10         | 820         | 822        | 0.147                     |
| 21  | 3-Methyl-cyclohexanone              | 8.19           | 945             | 958        | 13         | 881         | 896        | 0.094                     |
| 22  | 3-Ethylcyclopentanone               | 8.41           | 952             | 962        | 10         | 795         | 820        | 0.145                     |
| 23  | Benzaldehyde                        | 8.53           | 956             | 962        | 6          | 928         | 934        | 1.714                     |
| 24  | 4-Octanone                          | 8.98           | 970             | 976        | 6          | 797         | 851        | 0.144                     |
| 25  | Benzonitrile                        | 9.32           | 981             | 985        | 4          | 715         | 921        | 0.855                     |
| 26  | 2-Octanone                          | 9.58           | 989             | 990        | 1          | 862         | 874        | 1.260                     |
| 27  | 6-Octen-2-one                       | 9.80           | 996             | 985        | -11        | 707         | 825        | 0.093                     |
| 28  | Cycloheptanone                      | 10.20          | 1007            | 1015       | 8          | 910         | 919        | 0.303                     |
| 29  | 3,4,5-Trimethyl-2-cyclopenten-1-one | 10.74          | 1022            | 1033       | 11         | 690         | 832        | 0.032                     |
| 30  | 3-Octen-2-one                       | 10.97          | 1029            | 1040       | 11         | 665         | 666        | 0.234                     |
| 31  | (E)-2-Octenal                       | 11.92          | 1056            | 1060       | 4          | 660         | 689        | 0.065                     |
| 32  | Acetophenone                        | 12.15          | 1062            | 1065       | 3          | 902         | 931        | 0.186                     |
| 33  | 1-Octanol                           | 12.37          | 1068            | 1071       | 3          | 675         | 729        | 0.026                     |
| 34  | 8-Nonen-2-one                       | 12.80          | 1080            | 1085       | 5          | 812         | 856        | 0.174                     |

|    |                              |       |      |      |   |     |     |       |
|----|------------------------------|-------|------|------|---|-----|-----|-------|
| 35 | 3-Nonanone                   | 12.92 | 1084 | 1090 | 6 | 793 | 845 | 0.056 |
| 36 | 3-(Hydroxymethyl)-2-Nonanone | 13.10 | 1089 | 1093 | 4 | 909 | 968 | 0.297 |
| 37 | Cyclooctanone                | 13.93 | 1112 | 1115 | 3 | 682 | 809 | 0.027 |
| 38 | Methyl ester octanoic acid   | 14.29 | 1122 | 1126 | 4 | 751 | 795 | 0.002 |
| 39 | 2-Propyl-cyclohexanone       | 14.52 | 1129 | 1135 | 6 | 669 | 697 | 0.027 |
| 40 | Naphthalene                  | 16.25 | 1177 | 1182 | 5 | 772 | 850 | 0.024 |
| 41 | 2-Decanone                   | 16.67 | 1189 | 1193 | 4 | 811 | 833 | 0.041 |
| 42 | Methyl ester 8-nonenic acid  | 17.51 | 1213 | 1216 | 3 | 708 | 791 | 0.004 |
| 43 | 2-Undecanone                 | 20.15 | 1289 | 1294 | 5 | 666 | 769 | 0.004 |

$t_R$  = retention time

**Table S3.** Volatile compound profile of the ODH product in water obtained using the Rancimat method analyzed by using SPME CH/C 2DGC–FID/MS. The average difference between experimental and literature retention indices was within  $\pm 16$ .

| No. | Name                   | Retention time (min)                    |                    |                    | Retention index ( <i>I</i> ) |            |            | Match score |         | Area* (x10 <sup>7</sup> ) |
|-----|------------------------|-----------------------------------------|--------------------|--------------------|------------------------------|------------|------------|-------------|---------|---------------------------|
|     |                        | <sup>1</sup> $t_R$ + <sup>2</sup> $t_R$ | <sup>1</sup> $t_R$ | <sup>2</sup> $t_R$ | Experiment                   | Literature | Difference | Match       | R match |                           |
| 1   | Tetrahydrofuran        | 7.84                                    | 4.5                | 3.3                | 632                          | 623        | 9          | 691         | 848     | 0.695                     |
| 2   | 2-Butanone             | 8.03                                    | 4.5                | 3.5                | 632                          | 598        | 34         | 855         | 908     | 1.636                     |
| 3   | 2-Butenal              | 9.79                                    | 4.5                | 5.3                | 632                          | 629        | 3          | 780         | 843     | 0.713                     |
| 4   | (E)-2-Butenal          | 9.83                                    | 4.7                | 5.1                | 649                          | 647        | 2          | 823         | 839     | 2.532                     |
| 5   | 1-Butanol              | 11.31                                   | 4.7                | 6.6                | 649                          | 659        | 10         | 828         | 856     | 1.836                     |
| 6   | 2-Pentanone            | 9.34                                    | 5.1                | 4.2                | 683                          | 685        | 2          | 826         | 826     | 45.700                    |
| 7   | 3-Pentanol             | 10.86                                   | 5.1                | 5.8                | 683                          | 690        | 7          | 655         | 869     | 0.186                     |
| 8   | 3-Methyl-2-butanol     | 11.04                                   | 5.1                | 5.9                | 683                          | 674        | 9          | 792         | 835     | 0.652                     |
| 9   | 2-Butenenitrile        | 11.95                                   | 5.1                | 6.9                | 683                          | 664        | 19         | 673         | 842     | 0.334                     |
| 10  | Pentanal               | 9.40                                    | 5.3                | 4.1                | 700                          | 699        | 1          | 717         | 723     | 15.800                    |
| 11  | 2-Pentanol             | 11.08                                   | 5.3                | 5.8                | 700                          | 703        | 3          | 750         | 835     | 0.484                     |
| 12  | 3-Penten-2-one         | 11.77                                   | 5.7                | 6.1                | 724                          | 734        | 9          | 874         | 881     | 4.647                     |
| 13  | 3-Methyl-1-butanol     | 12.88                                   | 5.7                | 7.2                | 724                          | 736        | 12         | 805         | 858     | 1.125                     |
| 14  | Methyl Isobutyl Ketone | 10.16                                   | 5.9                | 4.3                | 736                          | 735        | 1          | 670         | 891     | 0.359                     |
| 15  | 2-Methyl-2-butenal     | 11.39                                   | 5.9                | 5.5                | 736                          | 746        | 10         | 754         | 866     | 0.526                     |
| 16  | (E)-3-Penten-2-one     | 11.80                                   | 5.9                | 5.9                | 736                          | 735        | 1          | 882         | 882     | 18.500                    |
| 17  | 3-Methyl-2-pentanone   | 10.47                                   | 6.1                | 4.4                | 748                          | 752        | 4          | 790         | 907     | 1.570                     |
| 18  | (E)-2-Pentenal         | 12.01                                   | 6.1                | 5.9                | 748                          | 754        | 6          | 846         | 850     | 1.695                     |
| 19  | Pyridine               | 12.99                                   | 6.1                | 6.9                | 748                          | 746        | 2          | 734         | 842     | 0.483                     |
| 20  | 1-Pentanol             | 13.89                                   | 6.3                | 7.6                | 760                          | 765        | 5          | 903         | 912     | 14.100                    |
| 21  | Toluene                | 11.04                                   | 6.5                | 4.5                | 772                          | 763        | 9          | 912         | 912     | 21.800                    |
| 22  | 3,5-Hexadien-2-ol      | 12.14                                   | 6.5                | 5.6                | 772                          | 781        | 9          | 783         | 783     | 22.900                    |
| 23  | Pentanenitrile         | 13.28                                   | 6.5                | 6.9                | 772                          | 738        | 34         | 896         | 905     | 8.944                     |

|    |                                    |       |     |     |     |     |    |     |     |         |
|----|------------------------------------|-------|-----|-----|-----|-----|----|-----|-----|---------|
| 24 | 3-Hexanone                         | 11.24 | 6.7 | 4.5 | 784 | 784 | 0  | 884 | 922 | 38.000  |
| 25 | 2-Hexanone                         | 11.65 | 6.7 | 5.0 | 784 | 790 | 6  | 823 | 826 | 107.000 |
| 26 | 2-Methyl-1-penten-3-one            | 11.79 | 6.7 | 5.1 | 784 | 748 | 36 | 705 | 795 | 0.244   |
| 27 | 4-Methyl-3-penten-2-one            | 12.55 | 6.9 | 5.7 | 796 | 798 | 2  | 927 | 935 | 14.200  |
| 28 | 3-Hexanol                          | 13.11 | 6.9 | 6.2 | 796 | 797 | 1  | 835 | 873 | 1.247   |
| 29 | Cyclopentanone                     | 13.49 | 6.9 | 6.6 | 796 | 791 | 5  | 937 | 873 | 25.400  |
| 30 | Tetrahydro-2-methyl-2H-pyran       | 10.81 | 7.1 | 3.7 | 806 | 838 | 32 | 693 | 771 | 0.473   |
| 31 | Hexanal                            | 11.84 | 7.1 | 4.7 | 806 | 800 | 6  | 725 | 728 | 26.200  |
| 32 | 3-Hexen-2-one(RI=811)              | 12.59 | 7.1 | 5.5 | 806 | 811 | 5  | 829 | 834 | 8.660   |
| 33 | 2-Hexanol                          | 13.58 | 7.1 | 6.5 | 806 | 801 | 5  | 731 | 766 | 3.754   |
| 34 | Hexamethyl-cyclotrisiloxane        | 10.16 | 7.5 | 2.7 | 822 | 851 | 29 | 896 | 900 | 2.976   |
| 35 | 2-Methyl-2-pentenal                | 13.15 | 7.5 | 5.7 | 822 | 837 | 15 | 655 | 780 | 0.286   |
| 36 | 4-Hexen-3-one                      | 13.88 | 7.7 | 6.2 | 830 | 855 | 25 | 882 | 882 | 6.598   |
| 37 | 3-Ethyl-2-pentanone                | 12.57 | 7.9 | 4.7 | 839 | 838 | 1  | 667 | 854 | 0.397   |
| 38 | 2-Methyl-cyclopentanone            | 14.15 | 7.9 | 6.3 | 839 | 846 | 7  | 923 | 935 | 24.600  |
| 39 | 3-Hexen-2-one(RI=845)              | 14.27 | 7.9 | 6.4 | 839 | 845 | 6  | 903 | 913 | 20.900  |
| 40 | 2-Cyclopenten-1-one                | 17.05 | 7.9 | 9.2 | 839 | 831 | 8  | 814 | 846 | 1.208   |
| 41 | 3-Methyl-2-hexanone                | 12.84 | 8.1 | 4.7 | 847 | 844 | 3  | 824 | 859 | 0.752   |
| 42 | 4-Methyl-2-hexanone                | 13.00 | 8.1 | 4.9 | 847 | 848 | 1  | 725 | 845 | 0.255   |
| 43 | 3-Methyl-cyclopentanone            | 14.58 | 8.1 | 6.5 | 847 | 853 | 6  | 862 | 880 | 7.388   |
| 44 | 5-Methyl-2-hexanone                | 13.38 | 8.3 | 5.1 | 855 | 862 | 7  | 711 | 853 | 0.827   |
| 45 | (E)-2-Hexenal                      | 14.53 | 8.3 | 6.2 | 855 | 854 | 1  | 733 | 848 | 1.189   |
| 46 | Tetrahydro-2-furanmethanol         | 12.81 | 8.5 | 4.3 | 863 | 885 | 22 | 717 | 820 | 0.673   |
| 47 | 1,3-Dimethyl-benzene               | 13.48 | 8.5 | 5.0 | 863 | 866 | 3  | 733 | 851 | 0.611   |
| 48 | 1-Hexanol                          | 16.55 | 8.5 | 8.1 | 863 | 868 | 5  | 854 | 886 | 5.547   |
| 49 | Tetrahydro-2-(methoxymethyl)-Furan | 12.83 | 8.7 | 4.1 | 871 | 859 | 12 | 757 | 797 | 1.755   |
| 50 | 4-Heptanone                        | 13.47 | 8.7 | 4.8 | 871 | 872 | 1  | 888 | 888 | 15.400  |
| 51 | 5-Hepten-2-one                     | 14.81 | 8.7 | 6.1 | 871 | 866 | 5  | 773 | 821 | 59.800  |
| 52 | Hexanenitrile                      | 16.07 | 8.9 | 7.2 | 880 | 877 | 3  | 893 | 920 | 10.100  |
| 53 | (E,E)-2,4-Hexadienal               | 17.19 | 8.9 | 8.3 | 880 | 911 | 31 | 701 | 763 | 0.568   |
| 54 | 3-Heptanone                        | 14.02 | 9.1 | 4.9 | 888 | 887 | 1  | 862 | 863 | 53.200  |
| 55 | 1-Methyl-cyclohexanol              | 14.44 | 9.1 | 5.3 | 888 | 908 | 20 | 751 | 754 | 153.000 |
| 56 | Cyclohexanol                       | 17.91 | 9.1 | 8.8 | 888 | 881 | 7  | 760 | 842 | 0.506   |
| 57 | 2-Heptanone                        | 14.48 | 9.3 | 5.2 | 896 | 891 | 5  | 828 | 831 | 62.900  |
| 58 | 2-Methyl-2-hexenal                 | 15.33 | 9.3 | 6.0 | 896 | 884 | 12 | 708 | 713 | 54.600  |
| 59 | 5-Methyl-3-hexen-2-one             | 15.58 | 9.3 | 6.3 | 896 | 875 | 21 | 747 | 748 | 22.800  |
| 60 | 3-Heptanol                         | 15.78 | 9.3 | 6.5 | 896 | 877 | 19 | 845 | 853 | 4.204   |

|    |                                                     |       |      |     |     |      |    |     |     |         |
|----|-----------------------------------------------------|-------|------|-----|-----|------|----|-----|-----|---------|
| 61 | 2-Heptanol                                          | 16.20 | 9.3  | 6.9 | 896 | 900  | 4  | 864 | 875 | 3.820   |
| 62 | Cyclohexanone                                       | 16.56 | 9.3  | 7.3 | 896 | 894  | 2  | 862 | 863 | 73.700  |
| 63 | 4-Cyclopentene-1,3-dione                            | 17.26 | 9.3  | 8.0 | 896 | 881  | 15 | 711 | 802 | 2.136   |
| 64 | 2-Propyltetrahydropyran                             | 13.37 | 9.5  | 3.9 | 904 | 911  | 7  | 773 | 829 | 0.814   |
| 65 | Heptanal                                            | 14.64 | 9.5  | 5.1 | 904 | 901  | 3  | 874 | 874 | 20.500  |
| 66 | 2-Methyl-2-cyclopenten-1-one                        | 17.86 | 9.7  | 8.2 | 911 | 913  | 2  | 915 | 917 | 18.500  |
| 67 | Deltacyclene                                        | 13.47 | 9.9  | 3.6 | 918 | 924  | 6  | 811 | 816 | 81.900  |
| 68 | 5,5-Dimethyl-2(5H)-furanone                         | 16.00 | 9.9  | 6.1 | 918 | 952  | 34 | 735 | 756 | 3.550   |
| 69 | Anisole                                             | 17.33 | 9.9  | 7.4 | 918 | 920  | 2  | 782 | 900 | 0.329   |
| 70 | 4-Oxohex-2-enal                                     | 16.30 | 10.3 | 6.0 | 933 | 957  | 24 | 808 | 825 | 4.644   |
| 71 | 1-Cyclopentyl-ethanone                              | 16.56 | 10.3 | 6.3 | 933 | 941  | 8  | 785 | 846 | 75.400  |
| 72 | 3-Hepten-2-one                                      | 16.80 | 10.3 | 6.5 | 933 | 937  | 4  | 856 | 857 | 12.300  |
| 73 | 2-Cyclohexen-1-one                                  | 19.46 | 10.3 | 9.2 | 933 | 920  | 13 | 881 | 883 | 5.685   |
| 74 | 4-Methyl-2-heptanone                                | 15.54 | 10.5 | 5.0 | 940 | 943  | 3  | 799 | 846 | 0.831   |
| 75 | Cyclohexanecarboxaldehyde                           | 16.75 | 10.5 | 6.3 | 940 | 963  | 23 | 727 | 787 | 0.388   |
| 76 | 3,5-Dimethyl-cyclohexene                            | 17.64 | 10.5 | 7.1 | 940 | 912  | 28 | 771 | 773 | 28.300  |
| 77 | 2-propenyl-Benzene                                  | 15.02 | 10.7 | 4.3 | 947 | 934  | 13 | 856 | 858 | 43.900  |
| 78 | 3-Methyl-2-heptanone                                | 15.64 | 10.7 | 4.9 | 947 | 937  | 10 | 875 | 885 | 2.301   |
| 79 | 2-Methyl-cyclohexanone                              | 17.44 | 10.7 | 6.7 | 947 | 953  | 6  | 902 | 916 | 53.200  |
| 80 | 3-Methyl-cyclohexanone                              | 17.81 | 10.7 | 7.1 | 947 | 958  | 11 | 873 | 894 | 2.202   |
| 81 | $\alpha$ -Methylstyrene                             | 15.02 | 10.9 | 4.1 | 955 | 976  | 21 | 906 | 918 | 47.000  |
| 82 | 6-Methyl-2-heptanone                                | 16.17 | 10.9 | 5.3 | 955 | 956  | 1  | 763 | 811 | 2.264   |
| 83 | 4-Methyl-cyclohexanone                              | 17.85 | 10.9 | 7.0 | 955 | 959  | 4  | 853 | 872 | 74.400  |
| 84 | 5-Methyl-2-heptanone                                | 16.57 | 11.1 | 5.5 | 962 | 971  | 9  | 857 | 912 | 2.059   |
| 85 | 2-Methyl-, 2-methyl-2-propenyl ester propanoic acid | 16.69 | 11.1 | 5.6 | 962 | 927  | 35 | 670 | 753 | 4.124   |
| 86 | (E)-2-Heptenal                                      | 17.52 | 11.1 | 6.4 | 962 | 958  | 4  | 805 | 873 | 3.935   |
| 87 | 3-Ethylcyclopentanone                               | 17.88 | 11.1 | 6.8 | 962 | 962  | 0  | 907 | 910 | 20.000  |
| 88 | 2-Butyltetrahydro-furan                             | 15.85 | 11.3 | 4.6 | 969 | 1004 | 35 | 694 | 861 | 6.595   |
| 89 | 1-Cyclohexyl-ethanone                               | 17.27 | 11.3 | 6.0 | 969 | 985  | 16 | 735 | 797 | 43.200  |
| 90 | 2-Methyl-1-hepten-6-one                             | 17.44 | 11.3 | 6.1 | 969 | 966  | 3  | 780 | 810 | 1.285   |
| 91 | 1-Heptanol                                          | 19.24 | 11.3 | 7.9 | 969 | 970  | 1  | 889 | 890 | 50.600  |
| 92 | 4-Octanone                                          | 16.40 | 11.5 | 4.9 | 976 | 976  | 0  | 910 | 911 | 26.100  |
| 93 | 2-Ethyl-2-hexenal                                   | 17.29 | 11.5 | 5.8 | 976 | 999  | 23 | 741 | 742 | 108.000 |
| 94 | 1-Methylcyclooctene                                 | 18.48 | 11.5 | 7.0 | 976 | 978  | 2  | 792 | 841 | 0.810   |
| 95 | Heptanonitrile                                      | 18.92 | 11.5 | 7.4 | 976 | 988  | 12 | 866 | 894 | 6.884   |
| 96 | 1-Octen-3-ol                                        | 19.19 | 11.5 | 7.7 | 976 | 980  | 4  | 916 | 919 | 13.200  |
| 97 | 3-Octanone                                          | 16.94 | 11.7 | 5.2 | 984 | 986  | 2  | 885 | 886 | 57.300  |

|     |                                      |       |      |     |      |      |    |     |     |         |
|-----|--------------------------------------|-------|------|-----|------|------|----|-----|-----|---------|
| 98  | 3,4-Dimethyl-2-cyclopenten-1-one     | 19.41 | 11.7 | 7.7 | 984  | 986  | 2  | 754 | 758 | 17.900  |
| 99  | 2-Norbornanone                       | 19.72 | 11.7 | 8.0 | 984  | 983  | 1  | 769 | 835 | 0.445   |
| 100 | 2-Octanone                           | 17.37 | 11.9 | 5.5 | 991  | 990  | 1  | 687 | 692 | 172.000 |
| 101 | 3,5,5-Trimethyl-2-hexene             | 17.70 | 11.9 | 5.8 | 991  | 985  | 6  | 706 | 775 | 7.196   |
| 102 | 6-Octen-2-one                        | 18.09 | 11.9 | 6.2 | 991  | 985  | 6  | 870 | 896 | 45.700  |
| 103 | 3-methyl-4-Heptanol                  | 18.25 | 11.9 | 6.4 | 991  | 997  | 6  | 752 | 781 | 2.362   |
| 104 | (Methoxymethyl)-benzene              | 19.01 | 11.9 | 7.1 | 991  | 984  | 7  | 900 | 946 | 1.306   |
| 105 | Tetrahydro-2H-pyran-2-methanol       | 16.35 | 12.1 | 4.3 | 998  | 992  | 6  | 792 | 801 | 1.868   |
| 106 | 2,6-Dimethyl-cyclohexanone           | 18.08 | 12.1 | 6.0 | 998  | 994  | 4  | 730 | 753 | 1.504   |
| 107 | 6-Methyl-5-hepten-2-one              | 18.19 | 12.1 | 6.1 | 998  | 986  | 12 | 685 | 714 | 38.900  |
| 108 | 3-Octanol                            | 18.52 | 12.1 | 6.4 | 998  | 994  | 4  | 734 | 774 | 1.612   |
| 109 | 2-Octanol                            | 18.93 | 12.1 | 6.8 | 998  | 998  | 0  | 884 | 897 | 4.796   |
| 110 | 1,4-Cyclohex-2-enedione              | 20.06 | 12.1 | 8.0 | 998  | 1032 | 34 | 758 | 812 | 11.100  |
| 111 | Octanal                              | 17.62 | 12.3 | 5.3 | 1005 | 1003 | 2  | 920 | 935 | 19.700  |
| 112 | Octahydro-1H-indene                  | 19.27 | 12.3 | 7.0 | 1005 | 991  | 14 | 674 | 835 | 0.307   |
| 113 | 1-(2-Methoxypropoxy)-2-propanol      | 20.25 | 12.3 | 8.0 | 1005 | 1010 | 5  | 712 | 710 | 0.542   |
| 114 | Benzofuran                           | 21.01 | 12.3 | 8.7 | 1005 | 1004 | 1  | 931 | 939 | 10.400  |
| 115 | 1-Propenyl-benzene                   | 16.17 | 12.5 | 3.7 | 1012 | 1011 | 1  | 827 | 834 | 1.035   |
| 116 | 1-(1-Cyclohexen-1-yl)-ethanone       | 19.41 | 12.5 | 6.9 | 1012 | 1023 | 11 | 859 | 912 | 5.548   |
| 117 | Cycloheptanone                       | 20.18 | 12.5 | 7.7 | 1012 | 1015 | 3  | 872 | 873 | 68.500  |
| 118 | Methyl ester heptanoic acid          | 17.86 | 12.7 | 5.2 | 1020 | 1023 | 3  | 789 | 812 | 0.537   |
| 119 | 3,5-Octadien-2-ol                    | 18.60 | 12.7 | 5.9 | 1020 | 1038 | 18 | 788 | 799 | 1.485   |
| 120 | Bicyclo[6.1.0]nonane                 | 19.98 | 12.7 | 7.3 | 1020 | 1003 | 17 | 693 | 790 | 0.555   |
| 121 | (E,E)-2,4-heptadienal                | 20.65 | 12.7 | 8.0 | 1020 | 1012 | 8  | 718 | 748 | 0.989   |
| 122 | 2,6-Dimethyl-7-octen-4-one           | 18.89 | 12.9 | 6.0 | 1027 | 1047 | 20 | 663 | 706 | 13.100  |
| 123 | 3-Ethyl-4-methylpentan-1-ol          | 19.11 | 12.9 | 6.2 | 1027 | 1023 | 4  | 668 | 705 | 8.291   |
| 124 | Methyl-cyclooctane                   | 19.42 | 12.9 | 6.5 | 1027 | 999  | 28 | 720 | 743 | 3.181   |
| 125 | 3,4,5-Trimethyl-2-cyclopenten-1-one  | 19.80 | 12.9 | 6.9 | 1027 | 1033 | 6  | 844 | 896 | 14.400  |
| 126 | 2-Ethyl-1-hexanol                    | 20.38 | 12.9 | 7.5 | 1027 | 1030 | 3  | 845 | 893 | 2.736   |
| 127 | 3-Octen-2-one                        | 19.82 | 13.1 | 6.7 | 1034 | 1040 | 6  | 727 | 728 | 23.600  |
| 128 | 5-Ethylcyclopent-1-enecarboxaldehyde | 20.19 | 13.1 | 7.1 | 1034 | 1040 | 6  | 655 | 665 | 3.698   |
| 129 | 4,5-Dimethyl-2-cyclohexen-1-one      | 20.48 | 13.3 | 7.2 | 1041 | 1016 | 25 | 735 | 740 | 7.903   |
| 130 | 2,3-Dimethyl-2-cyclopenten-1-one     | 22.14 | 13.3 | 8.9 | 1041 | 1040 | 1  | 811 | 832 | 2.166   |
| 131 | 3-(1-Methylethyl)-2-                 | 20.97 | 13.5 | 7.5 | 1048 | 1070 | 22 | 664 | 667 | 2.731   |

|     |                                          |       |      |     |      |      |    |     |     |         |
|-----|------------------------------------------|-------|------|-----|------|------|----|-----|-----|---------|
|     | cyclopenten-1-one                        |       |      |     |      |      |    |     |     |         |
| 132 | 1-Ethynyl-4-methyl-benzene               | 21.35 | 13.5 | 7.9 | 1048 | 1064 | 16 | 699 | 904 | 4.000   |
| 133 | Cis-4-methylcyclohexyl ester formic acid | 16.81 | 13.7 | 3.1 | 1055 | 1035 | 20 | 688 | 727 | 2.288   |
| 134 | Cyclopropyl-benzene                      | 19.12 | 13.7 | 5.4 | 1055 | 1032 | 23 | 797 | 831 | 7.864   |
| 135 | 2,2,3-Trimethyl-bicyclo[2.2.1]heptane    | 20.22 | 13.7 | 6.5 | 1055 | 1052 | 3  | 705 | 738 | 0.978   |
| 136 | (E)-2-Octenal                            | 20.36 | 13.7 | 6.7 | 1055 | 1060 | 5  | 899 | 910 | 19.300  |
| 137 | 1-Propynyl-benzene                       | 21.37 | 13.7 | 7.7 | 1055 | 1052 | 3  | 782 | 837 | 0.817   |
| 138 | N-butyl-benzene                          | 19.08 | 13.9 | 5.2 | 1062 | 1054 | 8  | 834 | 940 | 0.435   |
| 139 | 3-Nonen-5-one                            | 19.50 | 13.9 | 5.6 | 1062 | 1051 | 11 | 681 | 698 | 16.500  |
| 140 | 3-Methyl-1,2,4-cyclopentanetrione        | 20.72 | 13.9 | 6.8 | 1062 | 1090 | 28 | 684 | 716 | 5.003   |
| 141 | 2,3,4-Trimethyl-2-cyclopenten-1-one      | 21.63 | 13.9 | 7.7 | 1062 | 1071 | 9  | 874 | 906 | 4.541   |
| 142 | 2-Hexyl-tetrahydrofuran                  | 18.84 | 14.1 | 4.7 | 1069 | 1075 | 6  | 696 | 724 | 0.491   |
| 143 | Cyclohexyl ester acetic acid             | 20.24 | 14.1 | 6.1 | 1069 | 1043 | 26 | 681 | 691 | 21.600  |
| 144 | 2-Ethyl-3-methoxy-2-cyclopentenone       | 20.40 | 14.1 | 6.3 | 1069 | 1097 | 28 | 693 | 677 | 13.800  |
| 145 | Decahydro-, trans-naphthalene            | 20.55 | 14.1 | 6.5 | 1069 | 1056 | 13 | 691 | 727 | 0.561   |
| 146 | 2-Methoxy-phenol                         | 21.61 | 14.1 | 7.5 | 1069 | 1090 | 21 | 657 | 741 | 0.191   |
| 147 | 1-Octanol                                | 21.87 | 14.1 | 7.8 | 1069 | 1071 | 2  | 909 | 910 | 46.200  |
| 148 | (E)-2-Octen-1-ol                         | 22.75 | 14.1 | 8.7 | 1069 | 1067 | 2  | 757 | 826 | 0.492   |
| 149 | 3-Methyl-benzaldehyde                    | 23.63 | 14.1 | 9.5 | 1069 | 1070 | 1  | 904 | 931 | 1.879   |
| 150 | 2-Methyl-enzaldehyde                     | 23.68 | 14.1 | 9.6 | 1069 | 1064 | 5  | 915 | 947 | 0.836   |
| 151 | 2-Hexyl-2-furanmethanol                  | 18.86 | 14.3 | 4.6 | 1076 | 1075 | 1  | 717 | 728 | 3.263   |
| 152 | 5-Nonanone                               | 19.29 | 14.3 | 5.0 | 1076 | 1073 | 3  | 742 | 791 | 7.255   |
| 153 | 1,2-Dimethyl-cyclooctane                 | 20.17 | 14.3 | 5.9 | 1076 | 1069 | 7  | 682 | 692 | 6.791   |
| 154 | 3,7-Dimethyl-1,5,7-octatrien-3-ol        | 20.58 | 14.3 | 6.3 | 1076 | 1107 | 31 | 670 | 786 | 1.803   |
| 155 | 3-Ethyl-2,6-dimethyl-pyridine            | 18.24 | 14.5 | 3.7 | 1083 | 1110 | 27 | 685 | 709 | 0.435   |
| 156 | 8-Nonen-2-one                            | 20.77 | 14.5 | 6.3 | 1083 | 1085 | 2  | 843 | 874 | 77.700  |
| 157 | 2(1H)-Pyridinone                         | 21.63 | 14.5 | 7.1 | 1083 | 1094 | 11 | 658 | 747 | 2.423   |
| 158 | Octanenitrile                            | 21.75 | 14.5 | 7.3 | 1083 | 1082 | 1  | 885 | 907 | 3.066   |
| 159 | 3-Nonanone                               | 19.86 | 14.7 | 5.2 | 1090 | 1090 | 0  | 777 | 894 | 3.646   |
| 160 | 2-Nonanone                               | 20.26 | 14.7 | 5.6 | 1090 | 1092 | 2  | 817 | 825 | 109.000 |
| 161 | 4,4-Dimethyl-2-cyclohexen-1-one          | 22.46 | 14.7 | 7.8 | 1090 | 1101 | 11 | 785 | 839 | 3.304   |
| 162 | Undecane                                 | 18.20 | 14.9 | 3.3 | 1097 | 1100 | 3  | 847 | 896 | 0.807   |



|     |                                                                                             |       |      |     |      |      |    |     |     |        |
|-----|---------------------------------------------------------------------------------------------|-------|------|-----|------|------|----|-----|-----|--------|
| 163 | 3,3,6-Trimethyl-1,5-heptadien-4-ol                                                          | 19.27 | 14.9 | 4.4 | 1097 | 1084 | 13 | 732 | 776 | 0.971  |
| 164 | 7-Methyl-3-octen-2-one                                                                      | 21.44 | 14.9 | 6.5 | 1097 | 1062 | 35 | 693 | 758 | 2.395  |
| 165 | Linalool                                                                                    | 22.01 | 14.9 | 7.1 | 1097 | 1099 | 2  | 828 | 836 | 1.679  |
| 166 | Acetophenone                                                                                | 22.51 | 14.9 | 7.6 | 1097 | 1065 | 32 | 928 | 931 | 40.900 |
| 167 | Nonanal                                                                                     | 20.53 | 15.1 | 5.4 | 1105 | 1104 | 1  | 904 | 909 | 8.493  |
| 168 | 2-Methyl-3-ethyl-2-heptene                                                                  | 21.31 | 15.1 | 6.2 | 1105 | 1073 | 32 | 659 | 765 | 0.496  |
| 169 | Methyl ester 4-octenoic acid                                                                | 21.13 | 15.3 | 5.8 | 1112 | 1118 | 6  | 731 | 779 | 4.368  |
| 170 | 4-Acetyl-1-methylcyclohexene                                                                | 22.14 | 15.3 | 6.8 | 1112 | 1137 | 25 | 748 | 752 | 2.667  |
| 171 | 1,2,3,5-Tetramethylbenzene                                                                  | 23.18 | 15.3 | 7.9 | 1112 | 1117 | 5  | 687 | 711 | 1.579  |
| 172 | 2-Methyl-benzofuran                                                                         | 23.63 | 15.3 | 8.3 | 1112 | 1109 | 3  | 801 | 887 | 0.846  |
| 173 | Methyl ester octanoic acid                                                                  | 20.72 | 15.5 | 5.2 | 1119 | 1126 | 7  | 889 | 900 | 6.187  |
| 174 | 2-Nonanol                                                                                   | 21.17 | 15.5 | 5.7 | 1119 | 1102 | 17 | 652 | 679 | 5.060  |
| 175 | Decahydro-, cis-naphthalene                                                                 | 22.30 | 15.5 | 6.8 | 1119 | 1101 | 18 | 712 | 722 | 3.222  |
| 176 | 2-Nonen-4-one                                                                               | 21.92 | 15.7 | 6.2 | 1126 | 1124 | 2  | 684 | 731 | 1.410  |
| 177 | 2-Propyl-cyclohexanone                                                                      | 22.53 | 16.1 | 6.4 | 1141 | 1135 | 6  | 761 | 765 | 17.000 |
| 178 | 4-Isopropenylcyclohexanone                                                                  | 23.30 | 16.1 | 7.2 | 1141 | 1161 | 20 | 706 | 772 | 0.502  |
| 179 | 2,4,6-Cycloheptatrien-1-one                                                                 | 21.08 | 16.3 | 4.8 | 1148 | 1182 | 34 | 730 | 790 | 73.100 |
| 180 | Cyclodecane                                                                                 | 23.03 | 16.3 | 6.7 | 1148 | 1147 | 1  | 714 | 750 | 1.782  |
| 181 | $\beta$ -Methylbenzeneethanol                                                               | 21.14 | 16.5 | 4.6 | 1155 | 1179 | 24 | 670 | 671 | 16.700 |
| 182 | (E)-2-Nonenal                                                                               | 23.15 | 16.5 | 6.7 | 1155 | 1162 | 7  | 846 | 865 | 2.408  |
| 183 | 6,6-Dimethyl-(1R)-bicyclo[3.1.1]heptan-2-one                                                | 24.12 | 16.7 | 7.4 | 1163 | 1139 | 24 | 707 | 742 | 1.644  |
| 184 | 1,2,3,4-Tetrahydronaphthalene                                                               | 23.65 | 16.9 | 6.8 | 1170 | 1155 | 15 | 888 | 929 | 1.556  |
| 185 | trans-3-Nonen-2-one                                                                         | 23.88 | 16.9 | 7.0 | 1170 | 1144 | 26 | 764 | 780 | 3.444  |
| 186 | 1-Nonanol                                                                                   | 24.42 | 16.9 | 7.5 | 1170 | 1173 | 3  | 668 | 805 | 1.315  |
| 187 | 3-Nonen-2-one                                                                               | 23.05 | 17.1 | 6.0 | 1177 | 1142 | 35 | 661 | 669 | 3.809  |
| 188 | 1,2-Dimethyl-3-(1-methylethenyl)-, [1R-(1 $\alpha$ ,2 $\alpha$ ,3 $\alpha$ )]-cyclopentanol | 23.27 | 17.1 | 6.2 | 1177 | 1155 | 22 | 707 | 725 | 2.690  |
| 189 | 5-Methyl-2-(1-methylethyl)-, (1 $\alpha$ ,2 $\alpha$ ,5 $\beta$ )-cyclohexanol              | 24.56 | 17.1 | 7.5 | 1177 | 1168 | 9  | 791 | 880 | 0.656  |
| 190 | 1-(4-Methylphenyl)-ethanone                                                                 | 26.58 | 17.1 | 9.5 | 1177 | 1183 | 6  | 928 | 960 | 5.038  |
| 191 | 2-Decanone                                                                                  | 23.04 | 17.5 | 5.5 | 1192 | 1193 | 1  | 904 | 910 | 35.600 |
| 192 | Stereoisomer p-menth-8-en-1-ol                                                              | 23.79 | 17.5 | 6.3 | 1192 | 1161 | 31 | 706 | 727 | 4.517  |

|     |                                                |       |      |     |      |      |    |     |     |             |
|-----|------------------------------------------------|-------|------|-----|------|------|----|-----|-----|-------------|
| 193 | Naphthalene                                    | 26.80 | 17.5 | 9.3 | 1192 | 1182 | 10 | 941 | 945 | 8.763       |
| 194 | 1-(2-Methylphenyl)-<br>ethanone                | 27.06 | 17.5 | 9.6 | 1192 | 1173 | 19 | 773 | 930 | 0.530       |
| 195 | Dodecane                                       | 21.03 | 17.7 | 3.3 | 1199 | 1200 | 1  | 665 | 763 | 0.461       |
| 196 | Decanal                                        | 23.33 | 17.9 | 5.4 | 1206 | 1206 | 0  | 883 | 899 | 2.005       |
| 197 | 3-Decen-2-one                                  | 24.19 | 17.9 | 6.3 | 1206 | 1233 | 27 | 701 | 714 | 3.594       |
| 198 | 2,4-Dimethyl-<br>benzenemethanol               | 25.27 | 18.1 | 7.2 | 1214 | 1226 | 12 | 661 | 663 | 55.500      |
| 199 | N,N-Diethyl-2-methyl-<br>benzenamine           | 24.24 | 18.3 | 5.9 | 1222 | 1193 | 29 | 778 | 797 | 0.699       |
| 200 | 3-(1-Methylethyl)-<br>phenol                   | 26.56 | 18.3 | 8.3 | 1222 | 1228 | 6  | 668 | 702 | 3.156       |
| 201 | Isopropyl ether (3-<br>methylphenyl) methanol  | 21.81 | 18.5 | 3.3 | 1229 | 1212 | 17 | 659 | 705 | 0.687       |
| 202 | 2,3,6-Trimethyl-phenol                         | 24.79 | 18.5 | 6.3 | 1229 | 1239 | 10 | 662 | 669 | 113.00<br>0 |
| 203 | 3-Phenylpropanol                               | 24.78 | 18.9 | 5.9 | 1244 | 1232 | 12 | 671 | 765 | 110.00<br>0 |
| 204 | 2-Ethyl-6-methyl-phenol                        | 26.80 | 18.9 | 7.9 | 1244 | 1236 | 8  | 728 | 798 | 4.845       |
| 205 | 2,3-Dihydro-benzofuran                         | 23.69 | 19.3 | 4.4 | 1260 | 1224 | 36 | 764 | 813 | 1.012       |
| 206 | (E)-2-Decenal                                  | 25.82 | 19.3 | 6.5 | 1260 | 1263 | 3  | 902 | 914 | 5.968       |
| 207 | N,N-Diethyl-3-methyl-<br>benzenamine           | 26.30 | 19.3 | 7.0 | 1260 | 1290 | 30 | 816 | 849 | 1.491       |
| 208 | 4-Ethyl-3-methyl-phenol                        | 26.97 | 19.3 | 7.7 | 1260 | 1237 | 23 | 660 | 748 | 3.114       |
| 209 | (1-Methylenebutyl)-<br>benzene                 | 27.86 | 19.3 | 8.6 | 1260 | 1236 | 24 | 711 | 733 | 7.123       |
| 210 | 1-(4-Ethylphenyl)-<br>ethanone                 | 28.60 | 19.5 | 9.1 | 1267 | 1277 | 10 | 761 | 852 | 0.600       |
| 211 | 2,3,5-Trimethyl-phenol                         | 24.94 | 19.9 | 5.0 | 1282 | 1276 | 6  | 655 | 655 | 16.100      |
| 212 | 3-Undecanone                                   | 25.30 | 19.9 | 5.4 | 1282 | 1283 | 1  | 715 | 783 | 2.014       |
| 213 | 1,3,5,5-Tetramethyl-1,3-<br>cyclohexadiene     | 25.58 | 19.9 | 5.7 | 1282 | 1292 | 10 | 682 | 715 | 4.688       |
| 214 | (Z)-Undec-6-en-2-one                           | 26.13 | 19.9 | 6.2 | 1282 | 1274 | 8  | 759 | 805 | 7.867       |
| 215 | 1-Chloro-decane                                | 27.13 | 19.9 | 7.2 | 1282 | 1262 | 20 | 729 | 752 | 1.423       |
| 216 | 3-Phenyl-2-propenal                            | 23.44 | 20.1 | 3.3 | 1290 | 1274 | 16 | 673 | 783 | 0.679       |
| 217 | 2-Undecanone                                   | 25.69 | 20.1 | 5.6 | 1290 | 1294 | 4  | 927 | 927 | 9.546       |
| 218 | Methyl ester decanoic<br>acid                  | 26.05 | 20.9 | 5.2 | 1321 | 1325 | 4  | 869 | 921 | 2.297       |
| 219 | N,N-Diethyl-4-methyl-<br>benzenamine           | 25.21 | 21.7 | 3.5 | 1353 | 1343 | 10 | 807 | 824 | 1.048       |
| 220 | 1-Undecanol                                    | 31.26 | 22.3 | 9.0 | 1376 | 1371 | 5  | 827 | 899 | 2.958       |
| 221 | 3-Dodecanone                                   | 27.86 | 22.5 | 5.4 | 1384 | 1385 | 1  | 780 | 885 | 0.954       |
| 222 | 2-Dodecanone                                   | 28.26 | 22.5 | 5.8 | 1384 | 1396 | 12 | 870 | 922 | 4.299       |
| 223 | 2-Methyl-2-phenylethyl<br>ester propanoic acid | 30.77 | 22.7 | 8.1 | 1392 | 1396 | 4  | 835 | 892 | 1.813       |
| 224 | Decyl ester acetic acid                        | 29.78 | 23.3 | 6.5 | 1417 | 1408 | 9  | 710 | 783 | 1.337       |
| 225 | Trifluoro-dodecyl ester<br>acetic acid         | 31.84 | 23.3 | 8.5 | 1417 | 1432 | 15 | 724 | 795 | 1.107       |
| 226 | Methyl-3-methylphenyl                          | 30.10 | 23.7 | 6.4 | 1435 | 1465 | 30 | 845 | 848 | 7.564       |

| ester carbamic acid |                                       |       |      |     |      |      |    |     |     |       |
|---------------------|---------------------------------------|-------|------|-----|------|------|----|-----|-----|-------|
| 227                 | 1-Pentadecene                         | 28.83 | 24.9 | 3.9 | 1487 | 1492 | 5  | 861 | 887 | 3.453 |
| 228                 | 4-Phenoxy-octane                      | 29.97 | 24.9 | 5.1 | 1487 | 1464 | 23 | 712 | 742 | 3.583 |
| 229                 | 2-Tridecanone                         | 31.15 | 24.9 | 6.3 | 1487 | 1497 | 10 | 683 | 738 | 1.048 |
| 230                 | $\alpha$ Isomethyl ionone             | 32.08 | 24.9 | 7.2 | 1487 | 1480 | 7  | 756 | 783 | 1.675 |
| 231                 | 1-Dodecanol                           | 29.13 | 25.1 | 4.0 | 1495 | 1473 | 22 | 656 | 873 | 0.964 |
| 232                 | Methyl ester dodecanoic acid          | 31.44 | 25.5 | 5.9 | 1513 | 1526 | 13 | 828 | 864 | 2.829 |
| 233                 | Dodecyl ester formic acid             | 29.11 | 25.9 | 3.2 | 1531 | 1543 | 12 | 698 | 860 | 1.373 |
| 234                 | 3,5-Dimethyl-, methylcarbamate phenol | 32.41 | 26.3 | 6.1 | 1549 | 1564 | 15 | 718 | 781 | 0.479 |
| 235                 | 2,6,10-Trimethyl-tetradecane          | 34.67 | 26.5 | 8.2 | 1558 | 1539 | 19 | 679 | 734 | 0.715 |

$^1t_R$  = the retention time on  $^1D$  column

$^2t_R$  = the retention time on  $^2D$  column

$I_{\text{Experiment}}$  = Retention index from experiment  $I_{\text{Literature}}$  = Retention index from literature

$^1t_R + ^2t_R$  = total of the retention time on  $^1D$  and  $^2D$  column or peak time observed with MS detector

**Table S4.** Experimental profile of compounds in the oxidized products in water obtained using the Rancimat method and the analysis using 1 injection, with the compound identification performed by auto integration using Mass Hunter.

| Order | Name                           | Retention time (min) | Match | R match |
|-------|--------------------------------|----------------------|-------|---------|
| 1     | n-Hexane                       | 6.51                 | 852   | 860     |
| 2     | 2-Butanone                     | 7.77                 | 888   | 932     |
| 3     | 2-Pentanone                    | 9.25                 | 825   | 839     |
| 4     | 3-Methyl-butanal               | 9.34                 | 763   | 766     |
| 5     | Toluene                        | 11.02                | 878   | 887     |
| 6     | 3-Hexanone                     | 11.25                | 866   | 919     |
| 7     | 2-Hexanone                     | 11.65                | 832   | 838     |
| 8     | Octanal                        | 11.80                | 715   | 719     |
| 9     | 5-Hexen-2-one                  | 12.15                | 887   | 894     |
| 10    | 4-Methyl-3-penten-one          | 12.55                | 874   | 885     |
| 11    | 3,4,5-Trimethyl-1-hexene       | 12.84                | 755   | 776     |
| 12    | 3-Methyl-4-penten-2-one        | 13.20                | 819   | 942     |
| 13    | But-3-en-1-yl propyl carbonate | 13.28                | 720   | 761     |
| 14    | Tetrahydrofurfuryl acrylate    | 13.47                | 726   | 773     |
| 15    | 4-Methyl-, (S)-1-hexanol       | 13.89                | 790   | 797     |
| 16    | 4-Methyl-5-nonanone            | 14.04                | 738   | 818     |
| 17    | 2-Methyl-cyclopentanone        | 14.15                | 846   | 874     |
| 18    | 3-Hexen-2-one                  | 14.27                | 857   | 865     |
| 19    | 1-Methyl-cyclohexanol          | 14.44                | 753   | 757     |
| 20    | (Z)-2-Heptene                  | 14.57                | 743   | 756     |
| 21    | Heptanal                       | 14.64                | 731   | 790     |

|    |                                         |       |     |     |
|----|-----------------------------------------|-------|-----|-----|
| 22 | 1,5-Dimethyl-6-oxa-bicyclo[3.1.0]       | 14.81 | 765 | 789 |
| 23 | alpha-Methylstyrene                     | 15.00 | 828 | 842 |
| 24 | 3-Methyl-3-phenyl-azetidine             | 15.12 | 686 | 903 |
| 25 | 2-Ethyl-4-methyl-1-pentanol             | 15.27 | 678 | 751 |
| 26 | 1,5-Dimethyl-6-oxa-bicyclo[3.1.0]hexane | 15.33 | 788 | 798 |
| 27 | 1,5-Dimethyl-6-oxa-bicyclo[3.1.0]hexane | 15.58 | 780 | 790 |
| 28 | 5-Methyl-3-hexanol                      | 15.78 | 808 | 878 |
| 29 | 2-Butyltetrahydro-furan                 | 15.85 | 791 | 847 |
| 30 | 5-Methyl-3-hexen-2-one                  | 16.02 | 808 | 818 |
| 31 | Hexanenitrile                           | 16.07 | 747 | 800 |
| 32 | 2-nonanol                               | 16.21 | 760 | 792 |
| 33 | 2,2-Dimethyl-,(Z)-3-hexene              | 16.29 | 815 | 887 |
| 34 | 4-Octanol                               | 16.37 | 893 | 904 |
| 35 | Cyclooctane                             | 16.56 | 742 | 753 |
| 36 | 3,4,5-Trimethyl-1-hexene                | 16.67 | 751 | 794 |
| 37 | (Z)-3-Hepten-2-one                      | 16.80 | 830 | 835 |
| 38 | 2-Ethyl-cyclopentanone                  | 16.91 | 780 | 811 |
| 39 | 5-Methyl-3-heptanone                    | 16.92 | 752 | 753 |
| 40 | 5-Methyl-3-heptanone                    | 16.94 | 795 | 800 |
| 41 | 3-Isoproylcyclopentene                  | 17.13 | 755 | 777 |
| 42 | 1-(2-Butenenyloxy)-, (E)-heptane        | 17.22 | 711 | 773 |
| 43 | 1-Cyclohexyl-ethanone                   | 17.29 | 780 | 781 |
| 44 | 4-Hydroxy-4-methyl-cyclohexanone        | 17.37 | 768 | 784 |
| 45 | 7-Octen-2-one                           | 17.41 | 710 | 737 |
| 46 | Propyl-cyclopentane                     | 17.44 | 825 | 843 |
| 47 | 2,4-Dimethyl-cyclohexanol               | 17.63 | 816 | 833 |
| 48 | 3-t-Butyl-oct-6-en-ol                   | 17.69 | 742 | 746 |
| 49 | 1-Methyl-7-oxabicyclo[4.1.0]heptane     | 17.85 | 762 | 819 |
| 50 | 1,5-Dimethyl-7-oxabicyclo[4.1.0]heptane | 17.94 | 812 | 813 |
| 51 | 1,5-Dimethyl-7-oxabicyclo[4.1.0]heptane | 18.09 | 784 | 786 |
| 52 | 1-Cyclohexyl-ethanone                   | 18.19 | 828 | 878 |
| 53 | (Z)-6-octen-2-one                       | 18.41 | 861 | 864 |
| 54 | 4-Methyl-dodec-33-en-1-ol               | 18.53 | 717 | 726 |
| 55 | 2-Methyl-oct-2-enedial                  | 18.67 | 757 | 768 |
| 56 | Undecanal                               | 18.77 | 762 | 767 |
| 57 | Tetradecyl-oxirane                      | 18.86 | 753 | 766 |
| 58 | n-Heptadecanol-1                        | 18.99 | 752 | 752 |
| 59 | 1,2,4-Trimethyl-cyclohexane             | 19.11 | 734 | 766 |
| 60 | 5,9-Dimethyl-1-decanol                  | 19.19 | 749 | 762 |
| 61 | 1-nonanol                               | 19.24 | 799 | 808 |
| 62 | Hexyl-oxirane                           | 19.25 | 796 | 807 |
| 63 | Hexyl-oxirane                           | 19.26 | 734 | 762 |
| 64 | 3,5-Dimethyl-cyclohexene                | 19.41 | 785 | 807 |

|     |                                                                         |       |     |     |
|-----|-------------------------------------------------------------------------|-------|-----|-----|
| 65  | [(dodecyloxy)methyl]-oxirane                                            | 19.50 | 741 | 746 |
| 66  | (z)-2,3-Dimethyl-3-heptane                                              | 19.71 | 769 | 782 |
| 67  | undecanal                                                               | 19.82 | 708 | 711 |
| 68  | 2-Ethyl-cyclohexanone                                                   | 19.95 | 886 | 913 |
| 69  | Hexadecahydro-cyclobuta[1,2,3,4]dicyclooctene                           | 20.06 | 762 | 774 |
| 70  | 2,3-Dimethyl-2-cyclopenten-1-one                                        | 20.11 | 799 | 852 |
| 71  | Cyclodecane                                                             | 20.19 | 788 | 793 |
| 72  | 1,2-Epoxy-nonane                                                        | 20.26 | 750 | 764 |
| 73  | (E)-2-Octenal                                                           | 20.36 | 827 | 842 |
| 74  | trans-3-Nonen-2-one                                                     | 20.41 | 793 | 803 |
| 75  | 4,5-Dimethyl-2-cyclohexen-1-one                                         | 20.47 | 778 | 848 |
| 76  | Dodecanal                                                               | 20.54 | 785 | 795 |
| 77  | Nona-3,5-dien-2-ol                                                      | 20.64 | 792 | 796 |
| 78  | 3-Propyl-, (2Z)-2,4-pentadien-1-ol                                      | 20.72 | 714 | 784 |
| 79  | Nona-3,5-dien-2-ol                                                      | 20.77 | 756 | 762 |
| 80  | 2-Methylbenzo(e) [1,3]oxathiane                                         | 21.05 | 607 | 664 |
| 81  | 4-Ethynyl-6,8-dioxabicyclo[3.2.1]oct-2-en-4-ol                          | 21.06 | 620 | 664 |
| 82  | 3-Propyl-, (2Z) -2,4-pentadien-1-ol                                     | 21.23 | 699 | 802 |
| 83  | 4-Chloro-3-n-butyltetraahydropyran                                      | 21.35 | 602 | 675 |
| 84  | Nona-3,5-dien-2-ol                                                      | 21.46 | 745 | 756 |
| 85  | 1-Methyl-3-cyclohexene-1-carboxaldehyde                                 | 21.63 | 714 | 746 |
| 86  | Tetradecyl-oxirane                                                      | 21.75 | 742 | 812 |
| 87  | Methyl octyl ester carbonic acid                                        | 21.87 | 777 | 835 |
| 88  | 7-Oxo-octanoic acid                                                     | 22.03 | 711 | 713 |
| 89  | Levomenthol                                                             | 22.14 | 776 | 818 |
| 90  | Levomenthol                                                             | 22.29 | 739 | 763 |
| 91  | Cyclononanone                                                           | 22.52 | 757 | 760 |
| 92  | Mannosamine                                                             | 22.66 | 647 | 648 |
| 93  | Benzamidine                                                             | 22.77 | 664 | 682 |
| 94  | (1R,3E,7E,11R)-1,5,5,8-Tetramethyl-12-oxabicyclo[9.1.0]dodeca-3,3-diene | 22.94 | 636 | 703 |
| 95  | 4-[[[(2-Methoxy-4-octadecenyl)oxy)methyl]-2,2-dimethyl-1,3-dioxolane    | 23.04 | 684 | 705 |
| 96  | 2,4-Dimethyl-3-heptanol                                                 | 23.08 | 689 | 707 |
| 97  | I-Gala-I-ido-octose                                                     | 23.15 | 695 | 724 |
| 98  | 1-(1-Cyclohexen-1-yl)-ethanone                                          | 23.26 | 744 | 767 |
| 99  | 10-Undecanal                                                            | 23.33 | 755 | 761 |
| 100 | 4-Cyclohexyl-2-butanone                                                 | 23.51 | 704 | 803 |
| 101 | 1-(1-Methoxypropan-2-yloxy)propan-2-yl acetate                          | 23.63 | 626 | 738 |
| 102 | Z,Z-2,5-Pentadecadien-1-ol                                              | 23.74 | 702 | 706 |
| 103 | 3-Ethoxy-3,7-dimethyl-1,6-octadiene                                     | 23.84 | 687 | 700 |
| 104 | Methyl ester 6-nonenic acid                                             | 23.84 | 797 | 846 |
| 105 | Acetophenone                                                            | 24.08 | 739 | 798 |

|     |                                                             |       |     |     |
|-----|-------------------------------------------------------------|-------|-----|-----|
| 106 | Z,Z,Z-1,4,6,9-Nonadecatetraene                              | 24.19 | 686 | 687 |
| 107 | alpha,alpha-Dimethyl-benzenemethanol                        | 24.75 | 778 | 795 |
| 108 | 12-15,16-Diepoxyhexadecane                                  | 25.26 | 701 | 701 |
| 109 | 2-undecanone                                                | 25.69 | 752 | 875 |
| 110 | 4-tert-Butylcyclohexyl acetate                              | 25.76 | 800 | 829 |
| 111 | 3-Ethoxy-3,7-dimethyl-1,6-octadiene                         | 25.85 | 681 | 698 |
| 112 | E-2-Hexenyl benzoate                                        | 26.02 | 701 | 707 |
| 113 | 4-Acetyl-cycloheptanone                                     | 26.13 | 716 | 731 |
| 114 | 2-Methyl-1-hexadecanol                                      | 26.29 | 738 | 738 |
| 115 | 4-Trifluoroacetoxytridecane                                 | 26.33 | 799 | 839 |
| 116 | 11-Hydroxy-, methyl ester, [s-(E)]-8-dodecenoic acid        | 26.33 | 728 | 731 |
| 117 | 1-(3-Methylphenyl)-ethanone                                 | 26.58 | 731 | 799 |
| 118 | Tetrahydro-4-hydroxy-6-pentyl-2H-pyran-2-one                | 26.66 | 664 | 707 |
| 119 | Naphthalene                                                 | 26.80 | 700 | 836 |
| 120 | Bis(tert-butyl-dimethylsilyl)ether 3-chloropropane-1,2-diol | 27.86 | 649 | 727 |
| 121 | Geranyl vinyl ether                                         | 27.93 | 707 | 719 |
| 122 | 2-Dodecanone                                                | 28.26 | 757 | 871 |
| 123 | [(Hexadecyloxy)methyl]-oxirane                              | 28.75 | 719 | 769 |
| 124 | 3-Trifluoroacetoxy-pentadecane                              | 28.83 | 763 | 796 |
| 125 | 3-Trifluoroacetoxy-dodecane                                 | 28.92 | 732 | 757 |
| 126 | N-carbobenzyloxy-l-tyrosyl-l-valine                         | 30.10 | 727 | 788 |
| 127 | Octaethylene glycol monododecyl ether                       | 31.33 | 740 | 741 |
| 128 | Pterin-6-carboxylic acid                                    | 32.01 | 654 | 666 |
| 129 | Octaethylene glycol monododecyl ether                       | 34.33 | 700 | 702 |
| 130 | Eicosane                                                    | 34.71 | 877 | 891 |

---

### Peak capacity approximation based on the undersampling approach

When the significantly wide H/C window (0.2 min) was applied in this study, undersampling process occurred in the data analysis<sup>19</sup>. This results in re-combination of the separated peaks from <sup>1</sup>D separation (<sup>1</sup>D resolution loss due to overlapped selectivity with the <sup>2</sup>D separation) within the same H/C fraction. In an extreme case, such process leads to the average peak width at baseline in <sup>1</sup>D separation (<sup>1</sup>w<sub>b,ave</sub>) = t<sub>H/C</sub> as previously reported in<sup>3</sup>. In general, <sup>1</sup>w<sub>b,ave</sub> of peaks can be approximated according to<sup>1</sup>

$${}^1w_{b,ave} = \langle \beta \rangle w_{b,ave, MDGC - FID} \quad (S1)$$

where  $\langle \beta \rangle$  is the average first-dimension broadening factor (during the sampling process resulting in broader peak in <sup>1</sup>D separation than the corresponding width in 1DGC).  $\langle \beta \rangle$  can be approximated as<sup>19</sup>

$$\langle \beta \rangle = \left[ \sqrt{1 + 0.21 \left( \frac{t_{H/C}}{\sigma_{ave, MDGC - FID}} \right)^2} \right] \quad (S2).$$

w<sub>b,ave,MDGC-FID</sub> and  $\sigma_{ave,MDGC-FID}$  are average peak width at baseline and peak standard deviation of all the separated peaks (excluding that of the solvent) obtained from MDGC analysis with the DS diverging flow towards FID. The average width at baseline in chromatograms obtained with MS for each H/C analysis was assumed to be <sup>2</sup>w<sub>b,ave</sub> obtained from MDGC analysis with the DS diverging flow towards MS.

n<sub>c,total</sub><sup>20</sup> is calculated based on the 2D rectangular separation space between the first and the latest eluting peaks with the retention times of t<sub>R,first</sub> and t<sub>R,last</sub>, respectively. n<sub>c,total</sub> was calculated here according to<sup>19</sup>

$$n_{c,total} = {}^1n_c \times {}^2n_c \quad (S3)$$

$${}^1n_c = 1 + \frac{{}^1t_{R,last} - {}^1t_{R,first}}{\langle \beta \rangle w_{b,ave, MDGC - FID}} \quad (S4)$$

$${}^2n_c = \frac{{}^2D \text{ separation time}}{{}^2w_{b,ave}} \quad (\text{S5})$$

where the superscripts 1 and 2 indicate that the parameters are in <sup>1</sup>D or <sup>2</sup>D separation, respectively. <sup>2</sup>D separation time of 5 min was applied in this study since 2D separation was performed under wraparound situation where the <sup>2</sup>D separation space can be fully occupied. It should be noted that **Equations S1-S5** were used for the  $n_c$  calculation. However, these equations can be applicable providing that (1) the sample contains 50-1000 constituents, (2) <sup>1</sup>D to <sup>2</sup>D peak capacity ratios ( ${}^1n_c/{}^2n_c$ ) within the range from 0.125 to 8, (3) reduced <sup>1</sup> $\sigma$  to reduced <sup>2</sup> $\sigma$  ratios of  $\geq 1$  and  $\leq 8$ , and (4) saturation of the separation space ( $\alpha$ ) of  $\leq 1.5$  where  $\alpha$  is a statistical parameter inversely proportional to the total peak capacity ( $n_{c,\text{total}}$ )<sup>19</sup>. Whilst most of the data were in agreement with the criteria above, the  $n_c$  calculation for the CH/C using 2.5 and 5.0 min windows can be less reliable due to the relatively high  $\alpha$  and reduced  $\sigma$  ratio data, see all the related data provided in **Table S5**. The calculated peak capacity data obtained by using the undersampling approach (**Equations S1-S5**) are provided in **Figure S2**.

**Table S5.** Data of parameters related to peak capacity approximation for the CH/C analysis of the oxidized products in sample (obtained using the Rancimat method) using different H/C window. The data not passing the criteria are shown in *red italic*.

| H/C window                        | $\langle\beta\rangle$ | Approximated saturation of the separation space ( $\alpha$ ) | Reduced <sup>1</sup> $\sigma$ | Reduced <sup>2</sup> $\sigma$ | Reduced $\sigma$ Ratio         | ${}^1n_c/\langle\beta\rangle$ | ${}^2n_c$ | $n_c$ Ratio                    | Total $n_c$ | # identified peaks |
|-----------------------------------|-----------------------|--------------------------------------------------------------|-------------------------------|-------------------------------|--------------------------------|-------------------------------|-----------|--------------------------------|-------------|--------------------|
| 0.20                              | 1.25                  | 1.00                                                         | 0.001                         | 0.006                         | 6.08                           | 190                           | 40        | 0.21                           | 7600        | 235                |
| 0.25                              | 1.37                  | 1.03                                                         | 0.001                         | 0.007                         | 6.27                           | 174                           | 39        | 0.22                           | 6786        | 228                |
| 0.33                              | 1.60                  | 1.05                                                         | 0.001                         | 0.007                         | 6.71                           | 149                           | 37        | 0.25                           | 5513        | 223                |
| 0.42                              | 1.85                  | 1.07                                                         | 0.001                         | 0.008                         | 7.18                           | 129                           | 34        | 0.26                           | 4386        | 220                |
| 0.50                              | 2.12                  | 1.08                                                         | 0.001                         | 0.008                         | 7.39                           | 113                           | 33        | 0.29                           | 3729        | 217                |
| 0.83                              | 3.27                  | 1.16                                                         | 0.001                         | 0.008                         | 7.58                           | 74                            | 33        | 0.45                           | 2442        | 202                |
| 1.00                              | 3.87                  | 1.19                                                         | 0.001                         | 0.008                         | 7.68                           | 62                            | 32        | 0.52                           | 1984        | 197                |
| 1.25                              | 4.78                  | 1.29                                                         | 0.001                         | 0.008                         | 7.92                           | 51                            | 31        | 0.61                           | 1581        | 182                |
| 1.67                              | 6.32                  | 1.37                                                         | 0.001                         | 0.008                         | <i>8.01</i>                    | 39                            | 31        | 0.79                           | 1209        | 172                |
| 2.50                              | 9.41                  | <i>1.57</i>                                                  | 0.001                         | 0.009                         | <i>8.20</i>                    | 27                            | 30        | 1.11                           | 810         | 150                |
| 5.00                              | 18.73                 | <i>1.81</i>                                                  | 0.001                         | 0.009                         | <i>8.30</i>                    | 14                            | 30        | 2.14                           | 420         | 130                |
| <i>Suggested criteria for the</i> |                       | <i><math>\leq 1.5</math></i>                                 |                               |                               | <i>1 <math>\leq</math> and</i> |                               |           | <i>0.125 <math>\leq</math></i> |             | <i>50-1000</i>     |



<sup>1</sup>With the approach obtained from J. M. Davis, D. R. Stoll and P. W. Carr, *Anal. Chem.*, 2008, **80**, 461-73.

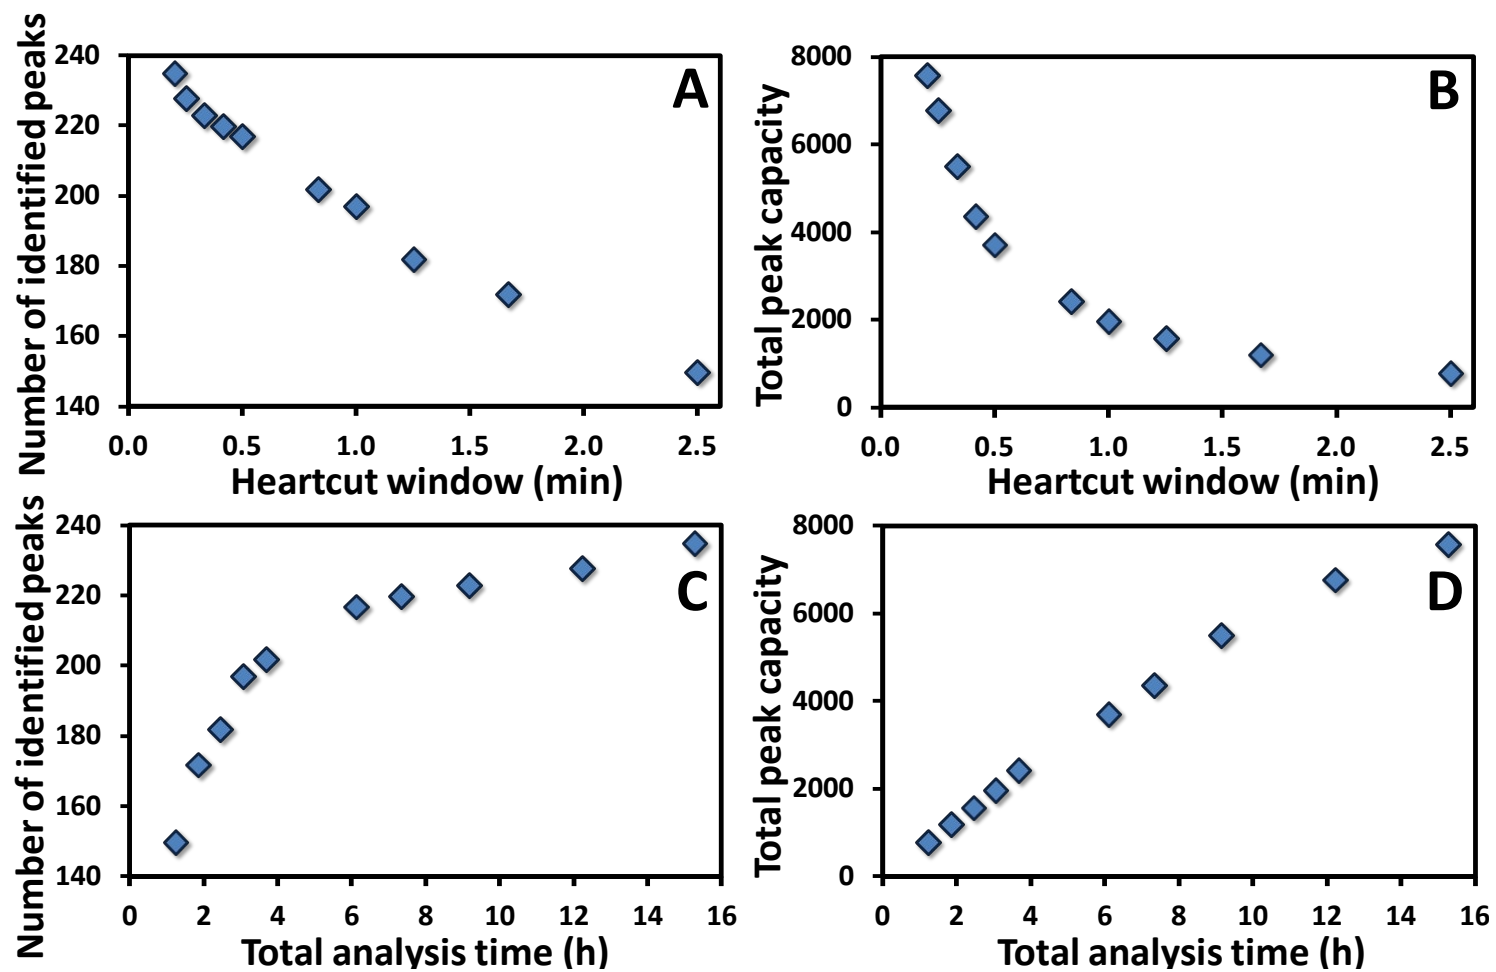

**Figure S2.** Effect of heartcut window with the developed CH/C MDGC analysis on (A) number of separated peaks and (B) total peak capacity obtained according to the undersampling approach, with the corresponding plots of (C) total analysis time vs number of separated peaks and (D) total analysis time vs total peak capacity.
